# Supplementary material for: Metal-Free Carbenoid C–H Insertion: A Versatile Strategy for Constructing Fluorenes with Quaternary Carbon Centers
Source: Research Square preprint supplement (doi:10.21203/rs.3.rs-7514325/v1), 2025-09-12

## Supporting Information

### **Metal-Free carbenoid C–H insertion: A versatile strategy for constructing fluorenes with quaternary carbon centres**

Lili Wu, Qiuzhan Huang, Cong-Ying Zhou,\* Chengming Wang\*

*College of Chemistry and Materials Science, Jinan University*

*Guangzhou, 511443, China*

*Email: cmwang2019@jnu.edu.cn; zhoucy2018@jnu.edu.cn*

#### **Table of Contents:**

|                                                              |             |
|--------------------------------------------------------------|-------------|
| <b>General Methods and Materials</b>                         | <b>S-2</b>  |
| <b>Conditions Screening</b>                                  | <b>S-3</b>  |
| <b>General Procedure</b>                                     | <b>S-7</b>  |
| <b>Characterization of Starting Materials and Products</b>   | <b>S-9</b>  |
| <b>Characterization of Products</b>                          | <b>S-13</b> |
| <b>Procedure for Scale-Up and Reduction Reaction</b>         | <b>S-30</b> |
| <b>References</b>                                            | <b>S-32</b> |
| <b>NMR Spectra Images of Starting Materials and Products</b> | <b>S-33</b> |

## General Methods and Materials

Unless specified, all reactions were carried out under a nitrogen atmosphere with dry solvents under anhydrous conditions. For reactions that require heating, the heat source is SCILOGEX (type: MS-H-Pro+) magnetic stirrer with metal heating module. Diazo compounds <sup>1-3</sup> were synthesized according to previous literatures. KHCO<sub>3</sub> (purity: 99%) was purchased from *Bidepharm*; MeCN (super dry, 99.7%) was purchased from *J&K*; all other reagents were purchased and used without further purification unless specified otherwise. Solvents for chromatography were technical grade and distilled prior to use.

Flash chromatography was performed using 200-300 mesh silica gel with the indicated solvent system according to standard techniques. Analytical thin-layer chromatography (TLC) was performed on pre-coated, glass-backed silica gel plates. Visualization of the developed chromatogram was performed by UV absorbance (254 nm).

<sup>1</sup>H NMR and <sup>13</sup>C NMR data were recorded on Bruker 300 M nuclear resonance spectrometers unless otherwise specified, respectively. Chemical shifts ( $\delta$ ) are given in parts per million relatively to the solvent peak, and coupling constants (*J*) are given in hertz (Hz). The peaks around  $\delta$  7.26 (<sup>1</sup>H NMR) and 77.16 (<sup>13</sup>C NMR) correspond to CDCl<sub>3</sub>. <sup>13</sup>C NMR spectra were recorded with total proton decoupling. Multiplicities are given as: s (singlet), brs (broad singlet), d (doublet), t (triplet), q (quartet), m (multiplet). High resolution mass spectrometry (HRMS) analysis was performed using electrospray ionization (ESI) with a quadrupole-time of flight (QTOF) mass analyzer. HRMS (ESI) analysis was performed by The Analytical Instrumentation Center at College of Chemistry and Materials Science, Jinan University, and (HRMS) data were reported with ion mass/charge (*m/z*) ratios as values in atomic mass units.

## Conditions Screening

**Table 1** Temperature optimizations <sup>a</sup>

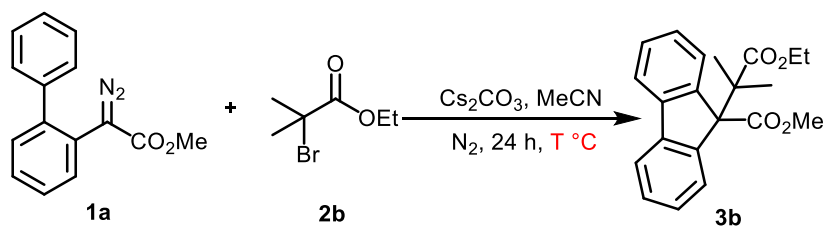

| Entry | Temperature (°C) | Yield of <b>3b</b> |
|-------|------------------|--------------------|
| 1     | 80               | 18%                |
| 2     | 90               | 50%                |
| 3     | <b>100</b>       | <b>56%</b>         |
| 4     | 110              | 55%                |
| 5     | 120              | 50%                |

<sup>a</sup> Reaction on a 0.1 mmol scale, using **1a** (1.0 equiv.), **2b** (2.0 equiv.),  $\text{Cs}_2\text{CO}_3$  (1.0 equiv.), MeCN (1.0 mL), under  $\text{N}_2$ , 24 h, and  $^1\text{H}$  NMR yield.

**Table 2** Base optimizations <sup>a</sup>

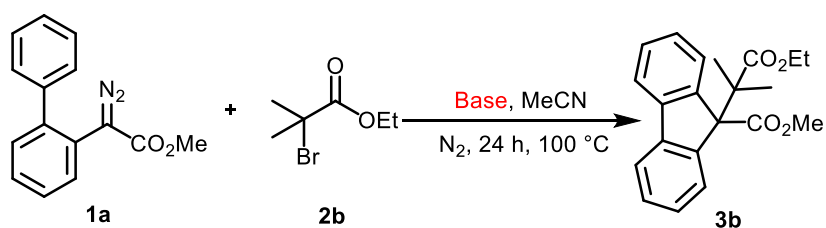

| Entry | Base                              | Yield of <b>3b</b> |
|-------|-----------------------------------|--------------------|
| 1     | <b><math>\text{KHCO}_3</math></b> | <b>71%</b>         |
| 2     | $\text{Na}_2\text{CO}_3$          | 27%                |
| 3     | $\text{K}_2\text{CO}_3$           | 70%                |
| 4     | $\text{Cs}_2\text{CO}_3$          | 56%                |
| 5     | $t\text{BuONa}$                   | 14%                |
| 6     | $\text{K}_3\text{PO}_4$           | 40%                |
| 7     | DIPEA                             | 62%                |
| 8     | DBU                               | 18%                |

<sup>a</sup> Reaction on a 0.1 mmol scale, using **1a** (1.0 equiv.), **2b** (2.0 equiv.), base (1.0 equiv.), MeCN (1.0 mL), under  $\text{N}_2$ , 24 h, and  $^1\text{H}$  NMR yield.

**Table 3** Solvent optimizations <sup>a</sup>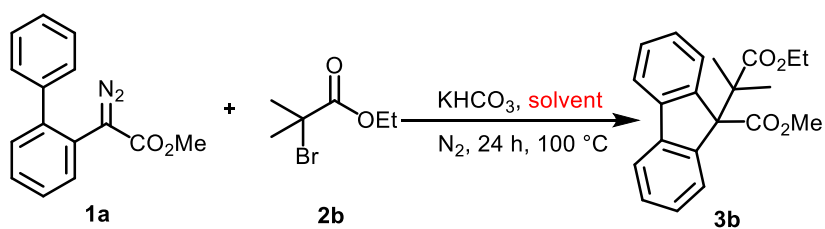

| Entry    | Solvent     | Yield of <b>3b</b> |
|----------|-------------|--------------------|
| 1        | 1,4-dioxane | 12%                |
| <b>2</b> | <b>MeCN</b> | <b>71%</b>         |
| 3        | DMSO        | 46%                |
| 5        | PhMe        | 67%                |
| 6        | DMF         | 69%                |
| 7        | DME         | 45%                |

<sup>a</sup> Reaction on a 0.1 mmol scale, using **1a** (1.0 equiv.), **2b** (2.0 equiv.),  $\text{KHCO}_3$  (1.0 equiv.), solvent (1.0 mL), under  $\text{N}_2$ , 24 h, and  $^1\text{H}$  NMR yield.

**Table 4** Amounts of  $\text{KHCO}_3$  <sup>a</sup>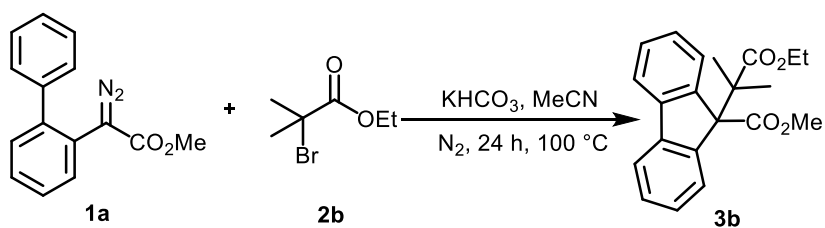

| Entry    | Amounts of $\text{KHCO}_3$ (equiv.) | Yield of <b>3b</b> |
|----------|-------------------------------------|--------------------|
| 1        | 0.5                                 | 41%                |
| <b>2</b> | <b>1.0</b>                          | <b>71%</b>         |
| 3        | 1.5                                 | 71%                |
| 4        | 2.0                                 | 71%                |

<sup>a</sup> Reaction on a 0.1 mmol scale, using **1a** (1.0 equiv.), **2b** (2.0 equiv.),  $\text{KHCO}_3$  (X equiv.), MeCN (1.0 mL), under  $\text{N}_2$ , 24 h, and  $^1\text{H}$  NMR yield.

**Table 5** Concentration optimizations <sup>a</sup>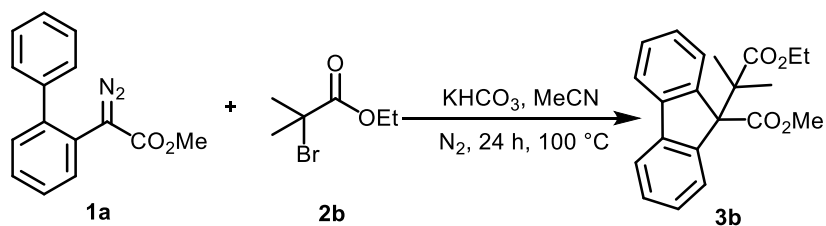

| Entry | Concentration (M) | Yield of <b>3b</b> |
|-------|-------------------|--------------------|
| 1     | 0.1               | 71%                |
| 2     | 0.2               | 66%                |
| 3     | 0.3               | 74%                |
| 4     | <b>0.5</b>        | <b>77%</b>         |
| 5     | 1.0               | 59%                |

<sup>a</sup> Reaction on a 0.1 mmol scale, using **1a** (1.0 equiv.), **2b** (2.0 equiv.),  $\text{KHCO}_3$  (1.0 equiv.), MeCN, under  $\text{N}_2$ , 24 h, and  $^1\text{H}$  NMR yield.

**Table 6** Amounts of **1a** and **2b** <sup>a</sup>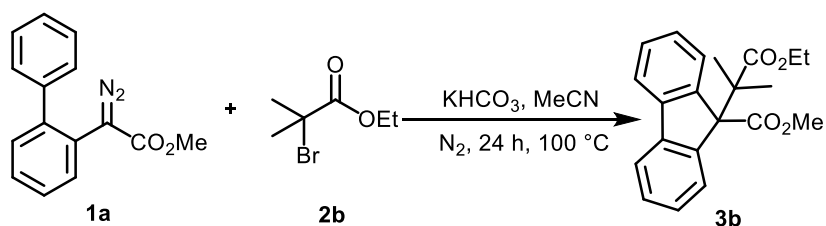

| Entry | Amounts of <b>1a</b> (equiv.) | Amounts of <b>2b</b> (equiv.) | Yield of <b>3b</b> |
|-------|-------------------------------|-------------------------------|--------------------|
| 1     | 1.0                           | 1.0                           | 54%                |
| 2     | 1.0                           | 1.2                           | 61%                |
| 3     | <b>1.0</b>                    | <b>1.5</b>                    | <b>79%</b>         |
| 4     | 1.0                           | 2.0                           | 77%                |
| 6     | 1.5                           | 1.0                           | 65%                |

<sup>a</sup> Reaction on a 0.1 mmol scale, using **1a** (X equiv.), **2b** (Y equiv.),  $\text{KHCO}_3$  (1.0 equiv.), MeCN (0.2 mL), under  $\text{N}_2$ , 24 h, and  $^1\text{H}$  NMR yield.

**Table 7** Reaction time optimizations <sup>a</sup>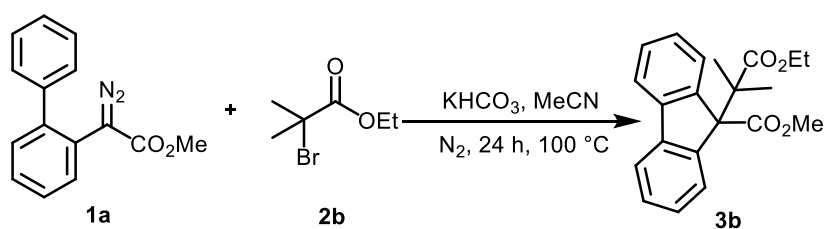

| Entry    | Time (h)  | Yield of <b>3b</b> |
|----------|-----------|--------------------|
| 1        | 8         | 49%                |
| 2        | 16        | 63%                |
| <b>3</b> | <b>24</b> | <b>79%</b>         |
| 4        | 30        | 65%                |
| 5        | 48        | 64%                |

<sup>a</sup> Reaction on a 0.1 mmol scale, using **1a** (1.0 equiv.), **2b** (1.5 equiv.), KHCO<sub>3</sub> (1.0 equiv.), MeCN (0.2 mL), under N<sub>2</sub>, and <sup>1</sup>H NMR yield.

**Table 8** Control experiments <sup>a</sup>

| Entry    | Variation from standard conditions | Yield of <b>3b</b> |
|----------|------------------------------------|--------------------|
| 1        | Without KHCO <sub>3</sub>          | N.D.               |
| <b>2</b> | <b>None</b>                        | <b>79%</b>         |

<sup>a</sup> Reaction on a 0.1 mmol scale, using **1a** (1.0 equiv.), **2b** (1.5 equiv.), KHCO<sub>3</sub> (1.0 equiv.), MeCN (0.2 mL), under N<sub>2</sub>, 24 h, and <sup>1</sup>H NMR yield.

**Note:**

DBU = 1,8-diazabicyclo[5,4,0]undec-7-ene; DME = 1,2-dimethoxyethane;

DIPEA = N,N-diisopropylethylamine;

N.D. = not detected.

## General Procedure

### (I) Preparation of alkyl 2-(biaryl-2-yl)diazoacetates<sup>2-3</sup>

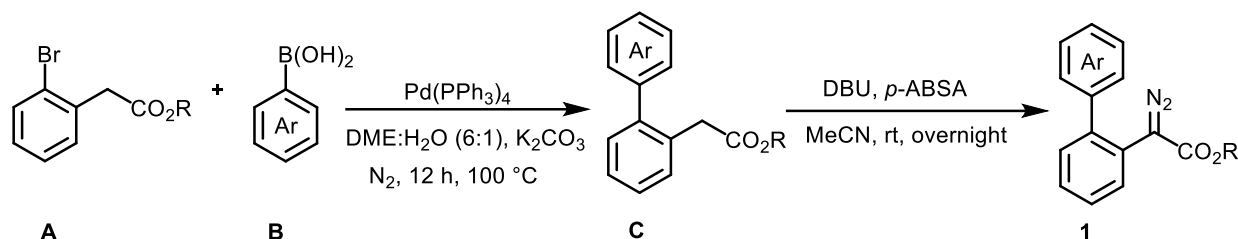

To a solution of alkyl 2-(2-bromophenyl)acetate **A** (10 mmol, 1.0 equiv.) and  $\text{Pd(PPh}_3)_4$  (0.1 mmol) dissolved in 40 mL DME (dimethoxyethane),  $\text{K}_2\text{CO}_3$  (30 mmol, 3.0 equiv) in 17 mL of distilled water was added under argon atmosphere. After stirring for 5 min, the corresponding boronic acid **B** (15 mmol, 1.5 equiv.) in 60 mL of DME was added, and the resulting mixture was heated to 100 °C for 12 h. After cooling, DME was evaporated under reduced pressure, and the residual was dissolved in DCM. The organic phase was washed with 1.0 M HCl solution and saturated  $\text{NaHCO}_3$  solution, dried over anhydrous  $\text{Na}_2\text{SO}_4$ . The solvent was removed under reduced pressure and the resulting residue was purified by column chromatography on silica gel by using a mixtures of petroleum ether/EtOAc (50:1) to provide alkyl 2-(biaryl-2-yl)acetates **C**.

To a dried 250 mL round bottom flask, **C** (12 mmol, 1.0 equiv.) and *p*-ABSA (*p*-acetamidobenzenesulfonyl azide) (36 mmol, 3.0 equiv.) were dissolved in MeCN (77 mL). After stirring for 5 min, DBU (120 mmol, 10 equiv.) was added. The reaction mixture was stirred for 12 h at room temperature. After reaction, water (50 mL) was added to the above solution, and the mixture was extracted with EtOAc (30 mL  $\times$  3). The organic layer was washed with saturated brine (30 mL) and dried over  $\text{Na}_2\text{SO}_4$ . The solvent was removed under reduced pressure and the resulting residue was purified by column chromatography on silica gel by using a mixtures of petroleum ether/EtOAc (50:1) as an eluent to provide the corresponding alkyl 2-(biaryl-2-yl)diazoacetate **1**.

### (II) Preparation of fluorene products

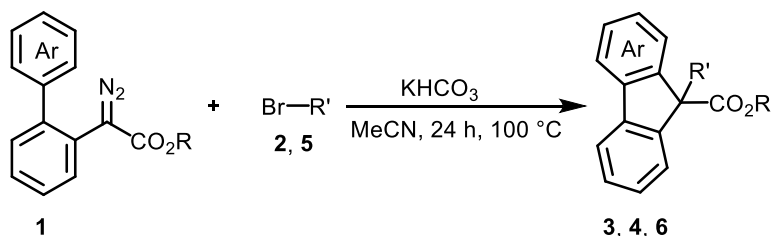

$\text{KHCO}_3$  (0.02 mmol, 1.0 equiv.) was weighed into a Schlenk tube. The reaction vessel was capped and subjected to three vacuum-purge/nitrogen-flush cycles. Then alkyl 2-(biaryl-2-yl)diazoacetate **1** (0.2 mmol, 1.0 equiv.) and **2/5** (0.3 mmol, 1.5 equiv.) in MeCN (0.4 mL) were added through the side-arm by syringe. The reaction was stirred

under nitrogen at 100 °C for 24 h. After reaction, the mixture was cooled to room temperature. Water (10 mL) was added to the above solution, and the mixture was extracted with EtOAc (10 mL × 3). The organic layer was washed with saturated brine (10 mL) and dried over Na<sub>2</sub>SO<sub>4</sub>. Volatile solvent and reagents were removed by rotary evaporation and the residue was purified by silica gel flash chromatography using petroleum ether/EtOAc (100:1 to 5:1) to afford the desired fluorene products **3-4, 6**.

## Characterization of Starting Materials

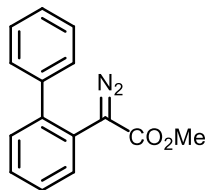

**methyl 2-([1,1'-biphenyl]-2-yl)-2-diazoacetate (1a).** Following the *General Procedure (I)*, yellow oil.  $^1\text{H}$  NMR (400 MHz,  $\text{CDCl}_3$ )  $\delta$  7.60 (d,  $J = 7.0$  Hz, 1H), 7.46-7.32 (m, 8H), 3.75 (s, 3H). The  $^1\text{H}$  NMR data was in accordance with previous report.<sup>1</sup>

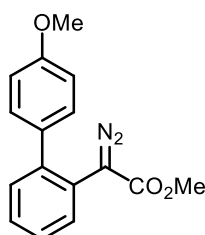

**methyl 2-diazo-2-(4'-methoxy-[1,1'-biphenyl]-2-yl)acetate (1b).** Following the *General Procedure (I)*, yellow oil.  $^1\text{H}$  NMR (400 MHz,  $\text{CDCl}_3$ )  $\delta$  7.61-7.56 (m, 1H), 7.42-7.24 (m, 6H), 7.00-6.93 (m, 2H), 3.85 (s, 3H), 3.77 (s, 2H). The  $^1\text{H}$  NMR data was in accordance with previous report.<sup>1</sup>

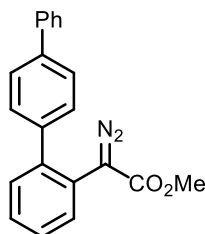

**methyl 2-([1,1':4',1''-terphenyl]-2-yl)-2-diazoacetate (1c).** Following the *General Procedure (I)*, yellow solid.  $^1\text{H}$  NMR (400 MHz,  $\text{CDCl}_3$ )  $\delta$  7.71-7.60 (m, 5H), 7.50-7.34 (m, 8H), 3.77 (s, 3H). The  $^1\text{H}$  NMR data was in accordance with previous report.<sup>1</sup>

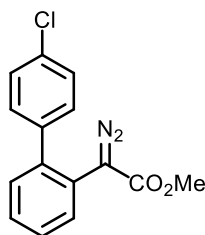

**methyl 2-(4'-chloro-[1,1'-biphenyl]-2-yl)-2-diazoacetate (1d).** Following the *General Procedure (I)*, yellow oil.  $^1\text{H}$  NMR (400 MHz,  $\text{CDCl}_3$ )  $\delta$  7.59 (d,  $J = 7.7$  Hz, 1H), 7.46-7.37 (m, 4H), 7.34-7.26 (m, 3H), 3.76 (s, 3H). The  $^1\text{H}$  NMR data was in accordance with previous report.<sup>1</sup>

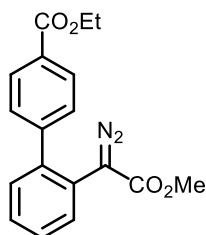

**ethyl 2'-(1-diazo-2-methoxy-2-oxoethyl)-[1,1'-biphenyl]-4-carboxylate (1e).** Following the *General Procedure (I)*, yellow oil.  $^1\text{H}$  NMR (400 MHz,  $\text{CDCl}_3$ )  $\delta$  8.12 (d,  $J$  = 8.4 Hz, 2H), 7.62 (dd,  $J$  = 7.4, 1.8 Hz, 1H), 7.49-7.34 (m, 5H), 4.41 (q,  $J$  = 7.1 Hz, 2H), 3.75 (s, 3H), 1.42 (t,  $J$  = 7.1 Hz, 3H). The  $^1\text{H}$  NMR data was in accordance with previous report.<sup>1</sup>

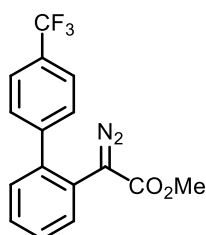

**methyl 2-diazo-2-(4'-(trifluoromethyl)-[1,1'-biphenyl]-2-yl)acetate (1f).** Following the *General Procedure (I)*, yellow oil.  $^1\text{H}$  NMR (400 MHz,  $\text{CDCl}_3$ )  $\delta$  7.70 (d,  $J$  = 8.1 Hz, 2H), 7.62 (d,  $J$  = 7.6 Hz, 1H), 7.50-7.41 (m, 4H), 7.36 (td,  $J$  = 7.9, 7.4, 1.6 Hz, 1H), 3.74 (s, 3H);  $^{19}\text{F}$  NMR (377 MHz,  $\text{CDCl}_3$ )  $\delta$  -62.53 (s, 3F). The  $^1\text{H}$  NMR data was in accordance with previous report.<sup>1</sup>

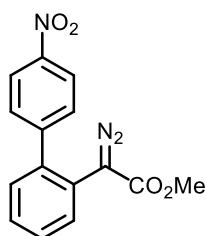

**methyl 2-diazo-2-(4'-nitro-[1,1'-biphenyl]-2-yl)acetate (1g).** Following the *General Procedure (I)*, yellow solid.  $^1\text{H}$  NMR (400 MHz,  $\text{CDCl}_3$ )  $\delta$  8.34-8.29 (m, 2H), 7.64 (dd,  $J$  = 7.5, 1.6 Hz, 1H), 7.56-7.43 (m, 4H), 7.37 (dd,  $J$  = 7.7, 1.5 Hz, 1H), 3.75 (s, 3H). The  $^1\text{H}$  NMR data was in accordance with previous report.<sup>1</sup>

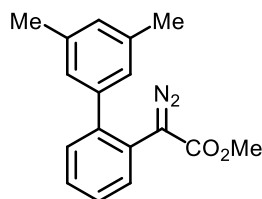

**methyl 2-diazo-2-(3',5'-dimethyl-[1,1'-biphenyl]-2-yl)acetate (1h).** Following the *General Procedure (I)*, yellow oil.  $^1\text{H}$  NMR (400 MHz,  $\text{CDCl}_3$ )  $\delta$  7.59 (d,  $J$  = 8.0 Hz, 1H), 7.43-7.30

(m, 3H), 6.99 (s, 1H), 6.94 (s, 2H), 3.77 (s, 3H), 2.35 (s, 6H). The  $^1\text{H}$  NMR data was in accordance with previous report.<sup>1</sup>

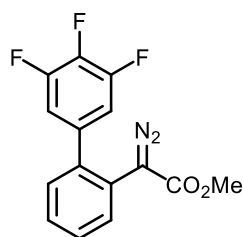

**methyl 2-diazo-2-(3',4',5'-trifluoro-[1,1'-biphenyl]-2-yl)acetate (1i).** Following the *General Procedure (I)*, yellow oil.  $^1\text{H}$  NMR (400 MHz,  $\text{CDCl}_3$ )  $\delta$  7.60 (dd,  $J$  = 7.7, 1.5 Hz, 1H), 7.49-7.38 (m, 2H), 7.29 (dd,  $J$  = 7.6, 1.6 Hz, 1H), 7.04-6.94 (m, 2H), 3.79 (s, 3H);  $^{19}\text{F}$  NMR (377 MHz,  $\text{CDCl}_3$ )  $\delta$  -133.44 (s, 1F), -133.49 (s, 1F), -161.51 (s, 1F). The  $^1\text{H}$  NMR data was in accordance with previous report.<sup>2</sup>

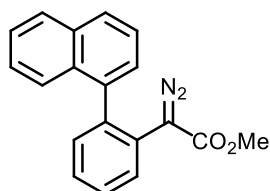

**methyl 2-diazo-2-(2-(naphthalen-1-yl)phenyl)acetate (1j).** Following the *General Procedure (I)*, yellow oil.  $^1\text{H}$  NMR (400 MHz,  $\text{CDCl}_3$ )  $\delta$  7.90 (dd,  $J$  = 8.3, 4.2 Hz, 2H), 7.70 (dd,  $J$  = 7.8, 1.4 Hz, 1H), 7.56-7.41 (m, 5H), 7.40-7.33 (m, 3H), 3.63 (s, 3H). The  $^1\text{H}$  NMR data was in accordance with previous report.<sup>1</sup>

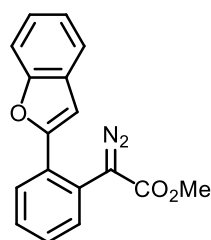

**methyl 2-(2-(benzofuran-2-yl)phenyl)-2-diazoacetate (1k).** Following the *General Procedure (I)*, yellow oil.  $^1\text{H}$  NMR (400 MHz,  $\text{CDCl}_3$ )  $\delta$  7.90-7.86 (m, 1H), 7.64-7.57 (m, 2H), 7.53 (d,  $J$  = 7.8 Hz, 1H), 7.47-7.42 (m, 2H), 7.33-7.25 (m, 2H), 6.92 (s, 1H), 3.77 (s, 3H);  $^{13}\text{C}$  NMR (101 MHz,  $\text{CDCl}_3$ )  $\delta$  154.8, 153.9, 132.1, 129.1, 129.1, 128.9, 128.9, 124.7, 123.1, 122.5, 121.3, 111.2, 104.8, 52.3. IR (ATR): 3063, 2952, 2089, 1698, 1434, 1256, 743  $\text{cm}^{-1}$ . HRMS (ESI)  $m/z$ :  $[\text{M}+\text{Na}]^+$  Calcd for  $\text{C}_{17}\text{H}_{12}\text{N}_2\text{NaO}_3$  315.0740; Found 315.0742.

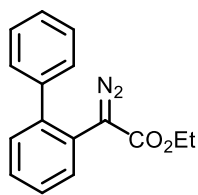

**ethyl 2-([1,1'-biphenyl]-2-yl)-2-diazoacetate (1).** Following the *General Procedure (I)*, yellow oil.  $^1\text{H}$  NMR (400 MHz,  $\text{CDCl}_3$ )  $\delta$  7.63-7.58 (m, 1H), 7.46-7.34 (m, 8H), 4.22 (q,  $J = 7.1$  Hz, 2H), 1.24 (t,  $J = 7.1$  Hz, 3H). The  $^1\text{H}$  NMR data was in accordance with previous report.<sup>3</sup>

## Characterization of Products

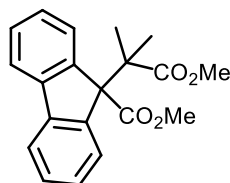

### **methyl 9-(1-methoxy-2-methyl-1-oxopropan-2-yl)-9H-fluorene-9-carboxylate (3a).**

Following the *General Procedure (II)*, the product was purified by flash chromatography on silica gel (petroleum ether/EtOAc, 80:1 to 50:1), 19.6 mg, yield: 31%, white solid, melting point: 110-113 °C.  $^1\text{H}$  NMR (400 MHz,  $\text{CDCl}_3$ )  $\delta$  7.69 (d,  $J$  = 7.3 Hz, 2H), 7.65 (d,  $J$  = 7.7 Hz, 2H), 7.39 (t,  $J$  = 7.4 Hz, 2H), 7.29 (t,  $J$  = 7.5 Hz, 2H), 3.76 (s, 3H), 3.66 (s, 3H), 1.14 (s, 6H);  $^{13}\text{C}$  NMR (101 MHz,  $\text{CDCl}_3$ )  $\delta$  176.7, 172.4, 143.2, 141.4, 128.3, 127.14, 127.10, 119.6, 65.3, 52.4, 52.2, 50.2, 22.9. IR (ATR): 2951, 1715, 1430, 1241, 751  $\text{cm}^{-1}$ . HRMS (ESI)  $m/z$ :  $[\text{M}+\text{Na}]^+$  Calcd for  $\text{C}_{20}\text{H}_{20}\text{NaO}_4$  347.1254; Found 347.1262.

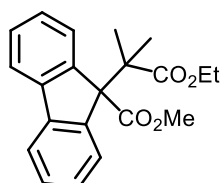

### **methyl 9-(1-ethoxy-2-methyl-1-oxopropan-2-yl)-9H-fluorene-9-carboxylate (3b).**

Following the *General Procedure (II)*, the product was purified by flash chromatography on silica gel (petroleum ether/EtOAc, 80:1 to 50:1), 40.7 mg, yield: 60%, white solid, melting point: 98-100 °C.  $^1\text{H}$  NMR (400 MHz,  $\text{CDCl}_3$ )  $\delta$  7.68 (t,  $J$  = 8.7 Hz, 4H), 7.39 (t,  $J$  = 7.5 Hz, 2H), 7.28 (t,  $J$  = 7.5 Hz, 2H), 4.21 (q,  $J$  = 7.1 Hz, 2H), 3.65 (s, 3H), 1.28 (t,  $J$  = 7.2 Hz, 3H), 1.14 (s, 6H);  $^{13}\text{C}$  NMR (101 MHz,  $\text{CDCl}_3$ )  $\delta$  176.2, 172.5, 143.4, 141.4, 128.3, 127.2, 127.1, 119.6, 65.3, 61.1, 52.4, 50.0, 22.9, 14.1. IR (ATR): 2985, 1712, 1238, 1137, 750  $\text{cm}^{-1}$ . HRMS (ESI)  $m/z$ :  $[\text{M}+\text{Na}]^+$  Calcd for  $\text{C}_{21}\text{H}_{22}\text{NaO}_4$  361.1410; Found 361.1399.

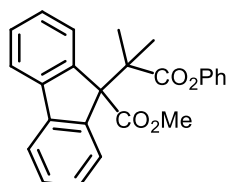

### **methyl 9-(2-methyl-1-oxo-1-phenoxypropan-2-yl)-9H-fluorene-9-carboxylate (3c).**

Following the *General Procedure (II)*, using **1a** (0.15 mmol). The product was purified by flash chromatography on silica gel (petroleum ether/EtOAc, 100:1 to 70:1), 41 mg, yield: 71%, white solid, melting point: 132-134 °C.  $^1\text{H}$  NMR (400 MHz,  $\text{CDCl}_3$ )  $\delta$  7.77 (d,  $J$  = 7.7 Hz, 2H), 7.71 (d,  $J$  = 7.5 Hz, 2H), 7.44-7.37 (m, 4H), 7.32 (td,  $J$  = 7.6, 1.3 Hz, 2H), 7.24 (t,  $J$  = 7.4 Hz, 1H), 7.07 (d,  $J$  = 7.5 Hz, 2H), 3.62 (s, 3H), 1.33 (s, 6H);  $^{13}\text{C}$  NMR (101 MHz,  $\text{CDCl}_3$ )  $\delta$  174.9, 172.3, 150.8, 143.2, 141.5, 129.6, 128.5, 127.3, 127.2, 126.0, 121.4, 119.7, 65.3, 52.6, 50.3, 23.2.

IR (ATR): 2945, 1718, 1448, 1109, 747  $\text{cm}^{-1}$ . HRMS (ESI)  $m/z$ :  $[\text{M}+\text{Na}]^+$  Calcd for  $\text{C}_{25}\text{H}_{22}\text{NaO}_4$  409.1410; Found 409.1422.

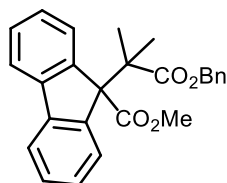

**methyl 9-(1-(benzyloxy)-2-methyl-1-oxopropan-2-yl)-9H-fluorene-9-carboxylate (3d).** Following the *General Procedure (II)*, using **1a** (0.15 mmol). The product was purified by flash chromatography on silica gel (petroleum ether/EtOAc, 60:1 to 40:1), 47.9 mg, yield: 80%, colorless oil.  $^1\text{H}$  NMR (400 MHz,  $\text{CDCl}_3$ )  $\delta$  7.66 (d,  $J$  = 7.6 Hz, 2H), 7.61 (d,  $J$  = 7.8 Hz, 2H), 7.40–7.32 (m, 7H), 7.24 (td,  $J$  = 7.6, 1.2 Hz, 2H), 5.19 (s, 2H), 3.49 (s, 3H), 1.17 (s, 6H);  $^{13}\text{C}$  NMR (101 MHz,  $\text{CDCl}_3$ )  $\delta$  176.0, 172.4, 143.3, 141.4, 135.6, 128.6, 128.4, 128.33, 128.31, 127.14, 127.12, 119.6, 67.0, 52.3, 50.2, 23.0. IR (ATR): 2949, 1724, 1236, 1129, 746  $\text{cm}^{-1}$ . HRMS (ESI)  $m/z$ :  $[\text{M}+\text{Na}]^+$  Calcd for  $\text{C}_{26}\text{H}_{24}\text{NaO}_4$  423.1567; Found 423.1573.

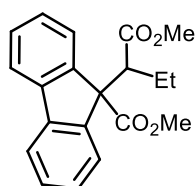

**methyl 9-(1-methoxy-1-oxobutan-2-yl)-9H-fluorene-9-carboxylate (3e).** Following the *General Procedure (II)*, using **1a** (0.15 mmol). The product was purified by flash chromatography on silica gel (petroleum ether/EtOAc, 100:1 to 60:1), 36.5 mg, yield: 75%, white solid, melting point: 120–123  $^{\circ}\text{C}$ .  $^1\text{H}$  NMR (400 MHz,  $\text{CDCl}_3$ )  $\delta$  7.93 (d,  $J$  = 7.8 Hz, 1H), 7.71 (dd,  $J$  = 7.7, 2.2 Hz, 2H), 7.61 (d,  $J$  = 7.5 Hz, 1H), 7.41 (td,  $J$  = 7.5, 1.2 Hz, 2H), 7.35–7.30 (m, 2H), 3.70 (s, 3H), 3.59 (s, 3H), 3.54 (dd,  $J$  = 10.5, 3.5 Hz, 1H), 1.22–1.12 (m, 1H), 0.87–0.75 (m, 1H), 0.67 (t,  $J$  = 7.3 Hz, 3H);  $^{13}\text{C}$  NMR (101 MHz,  $\text{CDCl}_3$ )  $\delta$  174.6, 173.3, 144.1, 142.8, 141.6, 141.3, 128.7, 128.4, 127.64, 127.62, 127.5, 124.4, 119.8, 119.7, 63.3, 53.9, 52.8, 51.7, 20.8, 12.7. IR (ATR): 2952, 1721, 1434, 1241, 752  $\text{cm}^{-1}$ . HRMS (ESI)  $m/z$ :  $[\text{M}+\text{Na}]^+$  Calcd for  $\text{C}_{20}\text{H}_{20}\text{NaO}_3$  347.1254; Found 347.1263.

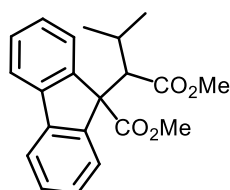

**methyl 9-(1-methoxy-3-methyl-1-oxobutan-2-yl)-9H-fluorene-9-carboxylate (3f).** Following the *General Procedure (II)*, using **1a** (0.15 mmol). The product was purified by flash chromatography on silica gel (petroleum ether/EtOAc, 80:1 to 50:1), 38.4 mg, yield: 76%,

white solid, melting point: 122-124 °C.  $^1\text{H}$  NMR (400 MHz,  $\text{CDCl}_3$ )  $\delta$  8.20 (d,  $J$  = 7.7 Hz, 1H), 7.72 (dd,  $J$  = 7.6, 4.4 Hz, 2H), 7.56 (d,  $J$  = 7.6 Hz, 1H), 7.44-7.38 (m, 2H), 7.32 (q,  $J$  = 6.8 Hz, 2H), 3.71 (s, 3H), 3.69 (d,  $J$  = 3.9 Hz, 1H), 3.53 (s, 3H), 1.15-1.05 (m, 1H), 0.72 (d,  $J$  = 6.9 Hz, 3H), 0.45 (d,  $J$  = 6.8 Hz, 3H);  $^{13}\text{C}$  NMR (101 MHz,  $\text{CDCl}_3$ )  $\delta$  174.5, 174.0, 144.3, 142.9, 142.1, 141.4, 129.0, 128.7, 128.4, 127.6, 127.4, 124.0, 119.9, 119.7, 63.0, 58.0, 52.8, 51.4, 26.5, 24.0, 19.8. IR (ATR): 2951, 1726, 1236, 1193, 749  $\text{cm}^{-1}$ . HRMS (ESI)  $m/z$ :  $[\text{M}+\text{Na}]^+$  Calcd for  $\text{C}_{21}\text{H}_{22}\text{NaO}_4$  361.1410; Found 361.1419.

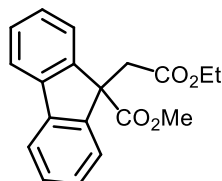

**methyl 9-(2-ethoxy-2-oxoethyl)-9H-fluorene-9-carboxylate (3g).** Following the *General Procedure (II)*, using **1a** (0.3 mmol). The product was purified by flash chromatography on silica gel (petroleum ether/EtOAc, 40:1 to 20:1), 65.7 mg, yield: 71%, colorless oil.  $^1\text{H}$  NMR (400 MHz,  $\text{CDCl}_3$ )  $\delta$  7.69 (dd,  $J$  = 11.4, 7.5 Hz, 4H), 7.39 (t,  $J$  = 7.5 Hz, 2H), 7.31 (t,  $J$  = 7.5 Hz, 2H), 4.10 (q,  $J$  = 7.1 Hz, 2H), 3.62 (s, 3H), 3.13 (s, 2H), 1.15 (t,  $J$  = 7.2 Hz, 3H);  $^{13}\text{C}$  NMR (101 MHz,  $\text{CDCl}_3$ )  $\delta$  173.1, 170.8, 144.7, 140.6, 128.6, 127.8, 125.2, 120.1, 60.8, 58.2, 52.9, 43.0, 14.1. IR (ATR): 2982, 1727, 1449, 1241, 739  $\text{cm}^{-1}$ . HRMS (ESI)  $m/z$ :  $[\text{M}+\text{Na}]^+$  Calcd for  $\text{C}_{19}\text{H}_{18}\text{NaO}_4$  333.1097; Found 333.1096.

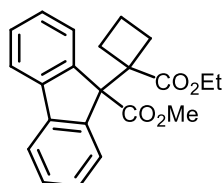

**methyl 9-(1-(ethoxycarbonyl)cyclobutyl)-9H-fluorene-9-carboxylate (3h).** Following the *General Procedure (II)*, using **1a** (0.3 mmol). The product was purified by flash chromatography on silica gel (petroleum ether/EtOAc, 80:1 to 50:1), 60.1 mg, yield: 57%, white solid, melting point: 95-98 °C.  $^1\text{H}$  NMR (400 MHz,  $\text{CDCl}_3$ )  $\delta$  7.71 (d,  $J$  = 7.6 Hz, 2H), 7.67 (d,  $J$  = 7.7 Hz, 2H), 7.41 (t,  $J$  = 7.5 Hz, 2H), 7.31 (t,  $J$  = 7.6 Hz, 2H), 4.21 (q,  $J$  = 7.2 Hz, 2H), 3.69 (s, 3H), 2.27-2.15 (m, 4H), 1.89-1.77 (m, 1H), 1.43-1.31 (m, 1H), 1.25 (t,  $J$  = 7.1 Hz, 3H);  $^{13}\text{C}$  NMR (101 MHz,  $\text{CDCl}_3$ )  $\delta$  175.5, 172.6, 142.8, 141.4, 128.5, 127.4, 126.5, 119.7, 63.9, 61.1, 54.4, 52.3, 27.7, 15.9, 14.0. IR (ATR): 2950, 1708, 1444, 1240, 749  $\text{cm}^{-1}$ . HRMS (ESI)  $m/z$ :  $[\text{M}+\text{Na}]^+$  Calcd for  $\text{C}_{22}\text{H}_{22}\text{NaO}_4$  373.1410; Found 373.1407.

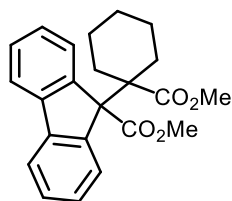

**methyl 9-(1-(methoxycarbonyl)cyclohexyl)-9H-fluorene-9-carboxylate (3i).** Following the *General Procedure (II)*, using **1a** (0.3 mmol). The product was purified by flash chromatography on silica gel (petroleum ether/EtOAc, 100:1 to 60:1), 30 mg, yield: 27%, colorless oil.  $^1\text{H}$  NMR (400 MHz,  $\text{CDCl}_3$ )  $\delta$  7.73 (d,  $J$  = 7.8 Hz, 2H), 7.66 (d,  $J$  = 7.7 Hz, 2H), 7.38 (td,  $J$  = 7.5, 1.1 Hz, 2H), 7.29 (td,  $J$  = 7.6, 1.3 Hz, 2H), 3.69 (s, 3H), 3.62 (s, 3H), 2.11 (d,  $J$  = 12.4 Hz, 2H), 1.57-1.44 (m, 3H), 1.37-1.15 (m, 5H);  $^{13}\text{C}$  NMR (101 MHz,  $\text{CDCl}_3$ )  $\delta$  173.7, 171.0, 142.3, 141.3, 128.3, 126.6, 119.2, 67.1, 55.2, 52.4, 51.5, 30.2, 25.1, 23.6. IR (ATR): 2947, 1727, 1219, 745  $\text{cm}^{-1}$ . HRMS (ESI)  $m/z$ :  $[\text{M}+\text{Na}]^+$  Calcd for  $\text{C}_{23}\text{H}_{24}\text{NaO}_4$  387.1567; Found 387.1558.

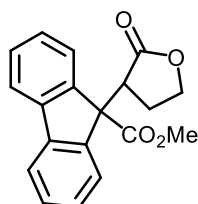

**methyl 9-(2-oxotetrahydrofuran-3-yl)-9H-fluorene-9-carboxylate (3j).** Following the *General Procedure (II)*, using **1a** (0.3 mmol). The product was purified by flash chromatography on silica gel (petroleum ether/EtOAc, 30:1 to 10:1), 72.7 mg, yield: 79%, white solid, melting point: 158-161  $^{\circ}\text{C}$ .  $^1\text{H}$  NMR (400 MHz,  $\text{CDCl}_3$ )  $\delta$  7.76-7.66 (m, 3H), 7.61 (d,  $J$  = 7.8 Hz, 1H), 7.47-7.38 (m, 2H), 7.37-7.30 (m, 2H), 4.14 (dd,  $J$  = 11.4, 9.0 Hz, 1H), 4.05-3.97 (m, 1H), 3.88 (td,  $J$  = 9.0, 2.2 Hz, 1H), 3.71 (s, 3H), 1.69-1.59 (m, 1H), 1.13-0.99 (m, 1H);  $^{13}\text{C}$  NMR (101 MHz,  $\text{CDCl}_3$ )  $\delta$  176.5, 172.2, 143.4, 141.9, 141.4, 140.4, 129.02, 128.96, 128.3, 128.2, 126.7, 123.9, 120.2, 120.1, 66.4, 60.6, 53.1, 47.1, 23.5. IR (ATR): 2956, 1764, 1726, 1449, 1374, 1240, 748  $\text{cm}^{-1}$ . HRMS (ESI)  $m/z$ :  $[\text{M}+\text{Na}]^+$  Calcd for  $\text{C}_{19}\text{H}_{16}\text{NaO}_4$  331.0941; Found 331.0942.

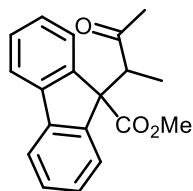

**methyl 9-(3-oxobutan-2-yl)-9H-fluorene-9-carboxylate (3k).** Following the *General Procedure (II)*, using **1a** (0.15 mmol). The product was purified by flash chromatography on silica gel (petroleum ether/EtOAc, 50:1 to 20:1), 30.5 mg, yield: 69%, white solid, melting point: 119-121  $^{\circ}\text{C}$ .  $^1\text{H}$  NMR (400 MHz,  $\text{CDCl}_3$ )  $\delta$  7.86 (d,  $J$  = 8.0 Hz, 1H), 7.70 (t,  $J$  = 6.9 Hz, 2H), 7.57 (d,  $J$  = 7.6 Hz, 1H), 7.39 (t,  $J$  = 7.4 Hz, 2H), 7.31 (t,  $J$  = 7.5 Hz, 2H), 3.87 (q,  $J$  = 7.6 Hz, 1H), 3.57 (s, 3H), 2.24 (s, 3H), 0.52 (d,  $J$  = 7.6 Hz, 3H);  $^{13}\text{C}$  NMR (101 MHz,  $\text{CDCl}_3$ )  $\delta$  210.2, 174.1, 144.4, 142.9, 142.0, 141.2, 128.7, 128.5, 128.1, 127.7, 127.6, 123.6, 119.8, 119.7, 63.06, 54.8, 52.7,

28.6, 10.9. IR (ATR): 2970, 1704, 1429, 1248, 750  $\text{cm}^{-1}$ . HRMS (ESI)  $m/z$ :  $[\text{M}+\text{Na}]^+$  Calcd for  $\text{C}_{19}\text{H}_{18}\text{NaO}_3$  317.1148; Found 317.1162.

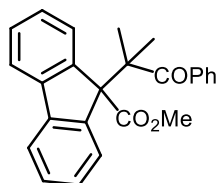

**methyl 9-(2-methyl-1-oxo-1-phenylpropan-2-yl)-9H-fluorene-9-carboxylate (3l).**

Following the *General Procedure (II)*, using **1a** (0.15 mmol). The product was purified by flash chromatography on silica gel (petroleum ether/EtOAc, 100:1 to 60:1), 39.1 mg, yield: 70%, white solid, melting point: 154-156  $^{\circ}\text{C}$ .  $^1\text{H}$  NMR (400 MHz,  $\text{CDCl}_3$ )  $\delta$  7.70 (d,  $J$  = 7.7 Hz, 4H), 7.45-7.27 (m, 9H), 3.68 (s, 3H), 1.24 (s, 6H);  $^{13}\text{C}$  NMR (101 MHz,  $\text{CDCl}_3$ )  $\delta$  209.5, 173.4, 144.2, 141.6, 139.6, 130.5, 128.3, 128.1, 127.5, 127.23, 127.16, 119.7, 65.6, 56.7, 52.4, 23.8. IR (ATR): 2947, 1712, 1239, 747  $\text{cm}^{-1}$ . HRMS (ESI)  $m/z$ :  $[\text{M}+\text{Na}]^+$  Calcd for  $\text{C}_{25}\text{H}_{22}\text{NaO}_3$  393.1461; Found 393.1477.

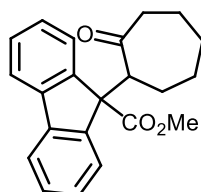

**methyl 9-(2-oxocycloheptyl)-9H-fluorene-9-carboxylate (3m).**

Following the *General Procedure (II)*, using **1a** (0.15 mmol). The product was purified by flash chromatography on silica gel (petroleum ether/EtOAc, 80:1 to 50:1), 25 mg, yield: 50%, colorless oil.  $^1\text{H}$  NMR (400 MHz,  $\text{CDCl}_3$ )  $\delta$  7.90 (d,  $J$  = 7.6 Hz, 1H), 7.74-7.68 (m, 2H), 7.62 (d,  $J$  = 7.6 Hz, 1H), 7.43-7.37 (m, 2H), 7.34-7.28 (m, 2H), 3.98-3.91 (m, 1H), 3.56 (s, 3H), 2.83-2.74 (m, 1H), 2.52-2.41 (m, 1H), 1.89-1.75 (m, 3H), 1.52-1.43 (m, 1H), 1.20-1.07 (m, 2H), 0.75-0.66 (m, 2H);  $^{13}\text{C}$  NMR (101 MHz,  $\text{CDCl}_3$ )  $\delta$  214.2, 174.2, 144.5, 143.3, 142.1, 141.4, 128.8, 128.7, 128.1, 127.7, 127.6, 123.7, 119.8, 119.6, 63.1, 59.6, 52.6, 44.0, 30.1, 29.7, 25.2, 23.8. IR (ATR): 2927, 1720, 1449, 1241, 738  $\text{cm}^{-1}$ . HRMS (ESI)  $m/z$ :  $[\text{M}+\text{Na}]^+$  Calcd for  $\text{C}_{22}\text{H}_{22}\text{NaO}_3$  357.1461; Found 357.1471.

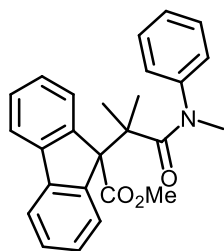

**methyl 9-(2-methyl-1-(methyl(phenyl)amino)-1-oxopropan-2-yl)-9H-fluorene-9-**

**carboxylate (3n).** Following the *General Procedure (II)*, the product was purified by flash chromatography on silica gel (petroleum ether/EtOAc, 20:1), 23.6 mg, yield: 30%, yellow solid, melting point: 163-165 °C. <sup>1</sup>H NMR (400 MHz, CDCl<sub>3</sub>) δ 7.73 (d, *J* = 7.5 Hz, 2H), 7.64 (d, *J* = 7.4 Hz, 2H), 7.36 (td, *J* = 7.4, 1.2 Hz, 2H), 7.29 (td, *J* = 7.5, 1.3 Hz, 2H), 7.23-7.18 (m, 3H), 7.02 (dd, *J* = 7.9, 1.8 Hz, 2H), 3.67 (s, 3H), 3.35 (s, 3H), 0.79 (s, 6H); <sup>13</sup>C NMR (101 MHz, CDCl<sub>3</sub>) δ 176.1, 173.5, 144.7, 144.4, 141.6, 129.3, 128.5, 128.0, 127.9, 127.4, 127.1, 119.4, 67.5, 60.4, 53.8, 52.3, 42.2, 24.1. IR (ATR): 2983, 2946, 1720, 1629, 1235, 747 cm<sup>-1</sup>. HRMS (ESI) *m/z*: [M+Na]<sup>+</sup> Calcd for C<sub>26</sub>H<sub>25</sub>NNaO<sub>3</sub> 422.1727; Found 422.1740.

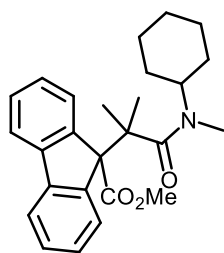

**methyl 9-(1-(cyclohexyl(methyl)amino)-2-methyl-1-oxopropan-2-yl)-9H-fluorene-9-carboxylate (3o).** Following the *General Procedure (II)*, using **1a** (0.3 mmol). The product was purified by flash chromatography on silica gel (petroleum ether/EtOAc, 50:1 to 20:1), 11 mg, yield: 14%, white solid, melting point: 195-197 °C. <sup>1</sup>H NMR (400 MHz, CDCl<sub>3</sub>) δ 7.73 (d, *J* = 7.7 Hz, 2H), 7.68 (d, *J* = 7.6 Hz, 2H), 7.39 (td, *J* = 7.5, 1.1 Hz, 2H), 7.29 (dd, *J* = 7.5, 1.2 Hz, 2H), 3.67 (s, 3H), 1.97-1.88 (m, 2H), 1.74-1.58 (m, 5H), 1.46-1.32 (m, 3H), 1.27 (dd, *J* = 9.7, 2.5 Hz, 1H), 1.11 (s, 6H); <sup>13</sup>C NMR (101 MHz, CDCl<sub>3</sub>) δ 174.8, 172.6, 143.6, 141.3, 128.2, 127.4, 127.1, 119.5, 65.4, 52.5, 49.8, 48.2, 33.1, 25.5, 24.8, 23.1. IR (ATR): 3279, 2927, 1725, 1621, 1241, 746 cm<sup>-1</sup>. HRMS (ESI) *m/z*: [M+Na]<sup>+</sup> Calcd for C<sub>26</sub>H<sub>31</sub>NNaO<sub>3</sub> 414.2040; Found 414.2054.

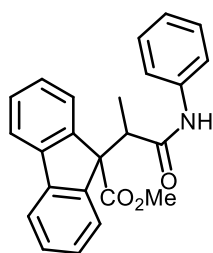

**methyl 9-(1-oxo-1-(phenylamino)propan-2-yl)-9H-fluorene-9-carboxylate (3p).** Following the *General Procedure (II)*, using **1a** (0.3 mmol), The product was purified by flash chromatography on silica gel (petroleum ether/EtOAc, 20:1), 11.2 mg, yield: 15%, colorless oil, melting point: 233-235 °C. <sup>1</sup>H NMR (400 MHz, CDCl<sub>3</sub>) δ 7.79 (d, *J* = 7.7 Hz, 1H), 7.73 (d, *J* = 7.5 Hz, 2H), 7.64 (d, *J* = 7.6 Hz, 1H), 7.61 (s, 1H), 7.48 (d, *J* = 7.6 Hz, 2H), 7.46-7.40 (m, 2H), 7.37-7.31 (m, 4H), 7.11 (t, *J* = 7.3 Hz, 1H), 3.60 (s, 3H), 0.69 (d, *J* = 7.1 Hz, 3H); <sup>13</sup>C NMR (101 MHz, CDCl<sub>3</sub>) δ 174.4, 171.4, 143.9, 142.1, 141.7, 141.3, 137.8, 129.1, 128.8, 128.5, 127.8, 127.7, 127.5, 124.3, 124.1, 120.1, 119.9, 119.8, 63.7, 53.0, 48.0, 12.1. IR (ATR): 3362, 2982, 1715,

1539, 1245, 748  $\text{cm}^{-1}$ . HRMS (ESI)  $m/z$ :  $[\text{M}+\text{Na}]^+$  Calcd for  $\text{C}_{24}\text{H}_{21}\text{NNaO}_3$  394.1414; Found 394.1416.

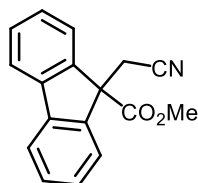

**methyl 9-(cyanomethyl)-9H-fluorene-9-carboxylate (3q).** Following the *General Procedure (II)*, using **1a** (0.3 mmol). The product was purified by flash chromatography on silica gel (petroleum ether/EtOAc, 40:1 to 20:1), 54.3 mg, yield: 68%, white solid, melting point: 130-132  $^{\circ}\text{C}$ .  $^1\text{H}$  NMR (400 MHz,  $\text{CDCl}_3$ )  $\delta$  7.78 (d,  $J$  = 7.6 Hz, 2H), 7.61 (d,  $J$  = 7.6 Hz, 2H), 7.49 (t,  $J$  = 7.5 Hz, 2H), 7.38 (t,  $J$  = 7.5 Hz, 2H), 3.63 (s, 3H), 3.15 (s, 2H);  $^{13}\text{C}$  NMR (101 MHz,  $\text{CDCl}_3$ )  $\delta$  171.9, 143.0, 140.9, 129.5, 128.3, 123.9, 120.7, 116.9, 57.4, 53.4, 26.3. IR (ATR): 2924, 2251, 1730, 1244, 749  $\text{cm}^{-1}$ . HRMS (ESI)  $m/z$ :  $[\text{M}+\text{Na}]^+$  Calcd for  $\text{C}_{17}\text{H}_{13}\text{NaO}_2$  286.0838; Found 286.0833.

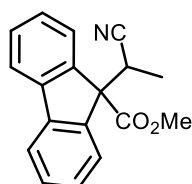

**methyl 9-(1-cyanoethyl)-9H-fluorene-9-carboxylate (3r).** Following the *General Procedure (II)*, using **1a** (0.15 mmol), the product was purified by flash chromatography on silica gel (petroleum ether/EtOAc, 80:1 to 50:1), 33.9 mg, yield: 81%, colorless oil.  $^1\text{H}$  NMR (400 MHz,  $\text{CDCl}_3$ )  $\delta$  7.87 (d,  $J$  = 7.7 Hz, 1H), 7.75 (t,  $J$  = 7.1 Hz, 2H), 7.52-7.38 (m, 4H), 7.34 (td,  $J$  = 7.6, 1.2 Hz, 1H), 3.88 (q,  $J$  = 7.2 Hz, 1H), 3.66 (s, 3H), 0.71 (d,  $J$  = 7.2 Hz, 3H);  $^{13}\text{C}$  NMR (101 MHz,  $\text{CDCl}_3$ )  $\delta$  172.0, 141.7, 141.53, 141.47, 141.2, 129.4, 129.3, 128.3, 128.1, 125.3, 123.6, 121.3, 120.5, 120.4, 62.0, 53.3, 32.4, 12.4. IR (ATR): 2952, 2243, 1723, 1241, 747  $\text{cm}^{-1}$ . HRMS (ESI)  $m/z$ :  $[\text{M}+\text{Na}]^+$  Calcd for  $\text{C}_{18}\text{H}_{15}\text{NNaO}_2$  300.0995; Found 300.1004.

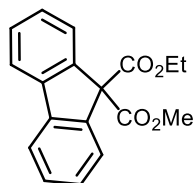

**ethyl 9-methyl 9H-fluorene-9,9-dicarboxylate (3s).** Following the *General Procedure (II)*, the product was purified by flash chromatography on silica gel (petroleum ether/EtOAc, 80:1 to 50:1), 22.1 mg, yield: 37%, white solid. melting point: 113-115  $^{\circ}\text{C}$ .  $^1\text{H}$  NMR (400 MHz,  $\text{CDCl}_3$ )  $\delta$  7.80 (d,  $J$  = 7.6 Hz, 2H), 7.71 (d,  $J$  = 7.5 Hz, 2H), 7.44 (td,  $J$  = 7.5, 1.2 Hz, 2H), 7.36 (td,  $J$  = 7.5, 1.2 Hz, 2H), 4.23 (q,  $J$  = 7.1 Hz, 2H), 3.75 (s, 3H), 1.24 (t,  $J$  = 7.1 Hz, 3H);  $^{13}\text{C}$  NMR (101 MHz,

CDCl<sub>3</sub>)  $\delta$  169.2, 168.4, 141.3, 140.1, 129.2, 127.8, 126.8, 120.1, 68.3, 62.4, 53.3, 14.0. IR (ATR): 3435, 2956, 1728, 1234, 1053, 748 cm<sup>-1</sup>. HRMS (ESI)  $m/z$ : [M+Na]<sup>+</sup> Calcd for C<sub>18</sub>H<sub>16</sub>NaO<sub>4</sub> 319.0941; Found 319.0947.

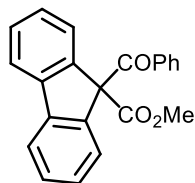

**methyl 9-benzoyl-9H-fluorene-9-carboxylate (3t).** Following the *General Procedure (II)*, the product was purified by flash chromatography on silica gel (petroleum ether/EtOAc, 80:1), 11 mg, yield: 18%, white solid, melting point: 98-100 °C. <sup>1</sup>H NMR (400 MHz, CDCl<sub>3</sub>)  $\delta$  7.75 (d,  $J$  = 7.6 Hz, 2H), 7.60 (d,  $J$  = 7.6 Hz, 2H), 7.40 (td,  $J$  = 7.6, 1.1 Hz, 2H), 7.27-7.21 (m, 3H), 7.12-7.05 (m, 2H), 7.04-6.96 (m, 2H), 3.74 (s, 3H); <sup>13</sup>C NMR (101 MHz, CDCl<sub>3</sub>)  $\delta$  196.7, 169.3, 141.3, 141.1, 135.3, 132.6, 129.3, 128.6, 128.2, 128.1, 127.4, 120.5, 53.3. IR (ATR): 2922, 1739, 1448, 1234, 743 cm<sup>-1</sup>. HRMS (ESI)  $m/z$ : [M+Na]<sup>+</sup> Calcd for C<sub>22</sub>H<sub>16</sub>NaO<sub>3</sub> 351.0992; Found 351.1004.

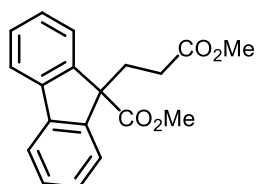

**methyl 9-(3-methoxy-3-oxopropyl)-9H-fluorene-9-carboxylate (3u).** Following the *General Procedure (II)*, the product was purified by flash chromatography on silica gel (petroleum ether/EtOAc, 50:1 to 30:1), 47 mg, yield: 76%, colorless oil. <sup>1</sup>H NMR (400 MHz, CDCl<sub>3</sub>)  $\delta$  7.72 (d,  $J$  = 7.5 Hz, 2H), 7.52 (d,  $J$  = 7.5 Hz, 2H), 7.40 (td,  $J$  = 7.5, 1.2 Hz, 2H), 7.33 (td,  $J$  = 7.5, 1.3 Hz, 2H), 3.58 (s, 3H), 3.48 (s, 3H), 2.79-2.71 (m, 2H), 1.70-1.62 (m, 2H); <sup>13</sup>C NMR (101 MHz, CDCl<sub>3</sub>)  $\delta$  173.6, 173.4, 144.2, 141.2, 128.5, 127.8, 124.5, 120.2, 60.5, 52.7, 51.5, 31.8, 28.6. IR (ATR): 2952, 1728, 1238, 728 cm<sup>-1</sup>. HRMS (ESI)  $m/z$ : [M+Na]<sup>+</sup> Calcd for C<sub>19</sub>H<sub>18</sub>NaO<sub>4</sub> 333.1097; Found 333.1110.

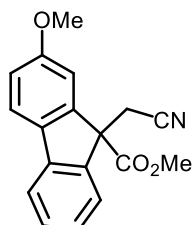

**methyl 9-(cyanomethyl)-2-methoxy-9H-fluorene-9-carboxylate (4a).** Following the *General Procedure (II)*, using **1b** (0.17 mmol). The product was purified by flash chromatography on silica gel (petroleum ether/EtOAc, 30:1 to 20:1), 28.7 mg, yield: 58%, colorless oil. <sup>1</sup>H NMR (400 MHz, CDCl<sub>3</sub>)  $\delta$  7.67 (d,  $J$  = 8.1 Hz, 2H), 7.55 (d,  $J$  = 7.6 Hz, 1H), 7.44

(t,  $J = 7.5$  Hz, 1H), 7.30 (t,  $J = 7.6$  Hz, 1H), 7.14 (d,  $J = 2.3$  Hz, 1H), 7.01 (dd,  $J = 8.4, 2.4$  Hz, 1H), 3.87 (s, 3H), 3.63 (s, 3H), 3.12 (d,  $J = 3.7$  Hz, 2H);  $^{13}\text{C}$  NMR (101 MHz,  $\text{CDCl}_3$ )  $\delta$  171.9, 160.1, 144.7, 142.6, 140.8, 133.5, 129.5, 127.0, 123.8, 121.6, 119.9, 116.9, 115.3, 109.6, 57.3, 55.7, 53.4, 26.4. IR (ATR): 2955, 2252, 1728, 1241, 730  $\text{cm}^{-1}$ . HRMS (ESI)  $m/z$ :  $[\text{M}+\text{Na}]^+$  Calcd for  $\text{C}_{18}\text{H}_{15}\text{NNaO}_3$  316.0944; Found 316.0961.

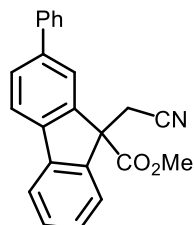

**methyl 9-(cyanomethyl)-2-phenyl-9H-fluorene-9-carboxylate (4b).** Following the *General Procedure (II)*, using **1c** (0.26 mmol). The product was purified by flash chromatography on silica gel (petroleum ether/EtOAc, 20:1), 31.0 mg, yield: 35%, white solid, melting point: 161-164  $^{\circ}\text{C}$ .  $^1\text{H}$  NMR (400 MHz,  $\text{CDCl}_3$ )  $\delta$  7.85-7.77 (m, 3H), 7.72 (dd,  $J = 8.0, 1.5$  Hz, 1H), 7.68-7.60 (m, 3H), 7.52-7.44 (m, 3H), 7.41-7.34 (m, 2H), 3.64 (s, 3H), 3.19 (s, 2H);  $^{13}\text{C}$  NMR (101 MHz,  $\text{CDCl}_3$ )  $\delta$  171.9, 143.8, 143.3, 141.5, 140.5, 139.9, 129.6, 129.0, 128.5, 128.2, 127.7, 127.2, 124.0, 122.6, 121.0, 120.8, 117.0, 57.4, 53.4, 26.4. IR (ATR): 2955, 2252, 1731, 1238, 761  $\text{cm}^{-1}$ . HRMS (ESI)  $m/z$ :  $[\text{M}+\text{Na}]^+$  Calcd for  $\text{C}_{23}\text{H}_{17}\text{NNaO}_2$  362.1151; Found 362.1157.

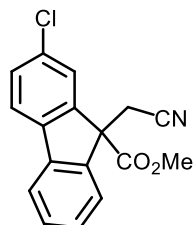

**methyl 2-chloro-9-(cyanomethyl)-9H-fluorene-9-carboxylate (4c).** Following the *General Procedure (II)*, using **1d** (0.12 mmol). The product was purified by flash chromatography on silica gel (petroleum ether/EtOAc, 40:1 to 20:1), 14.8 mg, yield: 42%, white solid, melting point: 171-173  $^{\circ}\text{C}$ .  $^1\text{H}$  NMR (400 MHz,  $\text{CDCl}_3$ )  $\delta$  7.75 (d,  $J = 7.4$  Hz, 1H), 7.70 (d,  $J = 8.1$  Hz, 1H), 7.62-7.57 (m, 2H), 7.52-7.44 (m, 2H), 7.40 (td,  $J = 7.5, 1.2$  Hz, 1H), 3.65 (s, 3H), 3.17 (d,  $J = 2.0$  Hz, 2H);  $^{13}\text{C}$  NMR (101 MHz,  $\text{CDCl}_3$ )  $\delta$  171.2, 144.5, 139.8, 139.5, 133.9, 129.9, 129.7, 128.6, 124.5, 124.0, 121.7, 120.8, 116.5, 57.5, 53.6, 26.2. IR (ATR): 2966, 2251, 1718, 1248, 747  $\text{cm}^{-1}$ . HRMS (ESI)  $m/z$ :  $[\text{M}_{\text{Cl}^{35}}+\text{Na}]^+$  Calcd for  $\text{C}_{17}\text{H}_{12}\text{ClNNaO}_2$  320.0449, Found 320.0449;  $[\text{M}_{\text{Cl}^{37}}+\text{Na}]^+$  Calcd for  $\text{C}_{17}\text{H}_{12}\text{ClNNaO}_2$  322.0419, Found 322.0425.

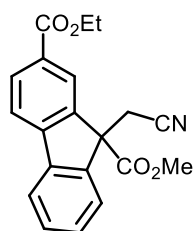

**2-ethyl 9-methyl 9-(cyanomethyl)-9H-fluorene-2,9-dicarboxylate (4d).** Following the *General Procedure (II)*, using **1e** (0.16 mmol). The product was purified by flash chromatography on silica gel (petroleum ether/EtOAc, 40:1 to 20:1), 41.5 mg, yield: 77%, white solid, melting point: 127-129 °C.  $^1\text{H}$  NMR (400 MHz,  $\text{CDCl}_3$ )  $\delta$  8.25-8.17 (m, 2H), 7.84 (dd,  $J$  = 7.6, 2.8 Hz, 2H), 7.65 (d,  $J$  = 7.4 Hz, 1H), 7.52 (td,  $J$  = 7.5, 1.2 Hz, 1H), 7.45 (td,  $J$  = 7.6, 1.2 Hz, 1H), 4.42 (q,  $J$  = 7.1 Hz, 2H), 3.63 (s, 3H), 3.36 (d,  $J$  = 16.6 Hz, 1H), 3.16 (d,  $J$  = 16.6 Hz, 1H), 1.43 (t,  $J$  = 7.1 Hz, 3H);  $^{13}\text{C}$  NMR (101 MHz,  $\text{CDCl}_3$ )  $\delta$  171.3, 166.1, 145.3, 143.9, 143.1, 139.8, 131.3, 130.3, 129.7, 129.4, 125.0, 124.2, 121.6, 120.5, 116.4, 61.3, 57.4, 53.5, 26.0, 14.4. IR (ATR): 2983, 2254, 1731, 1240, 731  $\text{cm}^{-1}$ . HRMS (ESI)  $m/z$ :  $[\text{M}+\text{Na}]^+$  Calcd for  $\text{C}_{20}\text{H}_{17}\text{NNaO}_4$  358.1050; Found 358.1061.

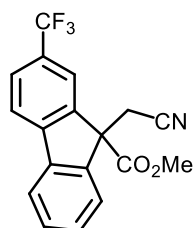

**methyl 9-(cyanomethyl)-2-(trifluoromethyl)-9H-fluorene-9-carboxylate (4e).** Following the *General Procedure (II)*, using **1f** (0.16 mmol). The product was purified by flash chromatography on silica gel (petroleum ether/EtOAc, 50:1 to 20:1), 48.5 mg, yield: 92%, white solid, melting point: 153-155 °C.  $^1\text{H}$  NMR (400 MHz,  $\text{CDCl}_3$ )  $\delta$  7.90-7.81 (m, 3H), 7.75 (d,  $J$  = 8.0 Hz, 1H), 7.66 (d,  $J$  = 7.5 Hz, 1H), 7.53 (td,  $J$  = 7.5, 1.2 Hz, 1H), 7.46 (td,  $J$  = 7.5, 1.2 Hz, 1H), 3.66 (s, 3H), 3.29-3.15 (m, 2H);  $^{19}\text{F}$  NMR (377 MHz,  $\text{CDCl}_3$ )  $\delta$  -61.90 (s, 3F);  $^{13}\text{C}$  NMR (101 MHz,  $\text{CDCl}_3$ )  $\delta$  171.0, 144.4, 143.5, 143.4, 139.3, 130.2 (q,  $J$  = 33.3 Hz), 129.8, 129.5, 127.0 (q,  $J$  = 4.0 Hz), 124.2, 124.0 (q,  $J$  = 273.7 Hz), 121.5, 121.03 (q,  $J$  = 4.0 Hz), 121.0, 116.3, 57.5, 53.6, 26.2. IR (ATR): 2923, 1728, 1329, 1245, 734  $\text{cm}^{-1}$ . HRMS (ESI)  $m/z$ :  $[\text{M}+\text{Na}]^+$  Calcd for  $\text{C}_{18}\text{H}_{12}\text{F}_3\text{NNaO}_2$  354.0712; Found 354.0707.

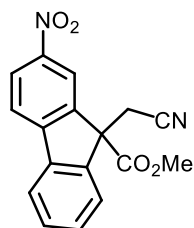

**methyl 9-(cyanomethyl)-2-nitro-9H-fluorene-9-carboxylate (4f).** Following the *General Procedure (II)*, the product was purified by flash chromatography on silica gel (petroleum

ether/EtOAc, 10:1), 48 mg, yield: 78%, white solid, melting point: 201-203 °C.  $^1\text{H}$  NMR (400 MHz,  $\text{CDCl}_3$ )  $\delta$  8.47 (d,  $J$  = 2.1 Hz, 1H), 8.41 (dd,  $J$  = 8.4, 2.1 Hz, 1H), 7.92 (d,  $J$  = 8.4 Hz, 1H), 7.89 (d,  $J$  = 7.4 Hz, 1H), 7.69 (d,  $J$  = 7.4 Hz, 1H), 7.60-7.50 (m, 2H), 3.68 (s, 3H), 3.39-3.25 (m, 2H);  $^{13}\text{C}$  NMR (101 MHz,  $\text{CDCl}_3$ )  $\delta$  170.5, 147.6, 147.3, 144.3, 143.9, 138.5, 130.4, 130.2, 125.7, 124.4, 122.2, 121.0, 119.8, 116.0, 57.6, 53.8, 26.0. IR (ATR): 2963, 2250, 1728, 1518, 1339, 1244, 741  $\text{cm}^{-1}$ . HRMS (ESI)  $m/z$ :  $[\text{M}+\text{Na}]^+$  Calcd for  $\text{C}_{17}\text{H}_{12}\text{N}_2\text{NaO}_4$  333.0689; Found 333.0693.

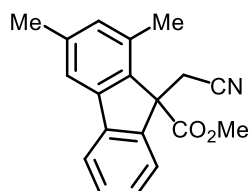

**methyl 9-(cyanomethyl)-1,3-dimethyl-9H-fluorene-9-carboxylate (4g).** Following the *General Procedure (II)*, using **1h** (0.16 mmol). The product was purified by flash chromatography on silica gel (petroleum ether/EtOAc, 40:1 to 20:1), 19.5 mg, yield: 42%, white solid, melting point: 203-205 °C.  $^1\text{H}$  NMR (400 MHz,  $\text{CDCl}_3$ )  $\delta$  7.74 (d,  $J$  = 7.6 Hz, 1H), 7.51-7.43 (m, 3H), 7.35 (td,  $J$  = 7.5, 1.2 Hz, 1H), 6.96 (s, 1H), 3.58 (s, 3H), 3.56 (d,  $J$  = 17.4 Hz, 1H), 3.24 (d,  $J$  = 16.9 Hz, 1H), 2.41 (s, 3H), 2.31 (s, 3H);  $^{13}\text{C}$  NMR (101 MHz,  $\text{CDCl}_3$ )  $\delta$  172.6, 143.5, 141.8, 141.3, 139.5, 138.2, 133.7, 131.3, 129.5, 128.1, 122.9, 120.7, 119.2, 116.3, 57.2, 53.2, 24.2, 21.5, 18.4. IR (ATR): 2955, 2248, 1720, 1435, 1248, 757  $\text{cm}^{-1}$ . HRMS (ESI)  $m/z$ :  $[\text{M}+\text{Na}]^+$  Calcd for  $\text{C}_{19}\text{H}_{17}\text{NNaO}_2$  314.1151; Found 314.1159.

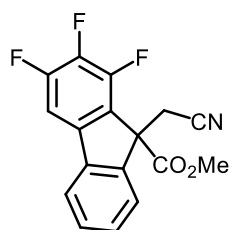

**methyl 9-(cyanomethyl)-1,2,3-trifluoro-9H-fluorene-9-carboxylate (4h).** Following the *General Procedure (II)*, the product was purified by flash chromatography on silica gel (petroleum ether/EtOAc, 50:1 to 20:1), 42.7 mg, yield: 67%, white solid, melting point: 172-174 °C.  $^1\text{H}$  NMR (400 MHz,  $\text{CDCl}_3$ )  $\delta$  7.69 (d,  $J$  = 7.6 Hz, 1H), 7.59 (d,  $J$  = 7.6 Hz, 1H), 7.52 (t,  $J$  = 7.4 Hz, 1H), 7.45 (d,  $J$  = 7.5 Hz, 1H), 7.43-7.35 (m, 1H), 3.66 (s, 3H), 3.63-3.33 (m, 2H);  $^{19}\text{F}$  NMR (377 MHz,  $\text{CDCl}_3$ )  $\delta$  -130.73 (dd,  $J$  = 19.3, 8.2 Hz, 1F), -137.93 (dd,  $J$  = 20.8, 8.2 Hz, 1F), -160.03 (t,  $J$  = 18.9 Hz, 1F);  $^{13}\text{C}$  NMR (101 MHz,  $\text{CDCl}_3$ )  $\delta$  170.0, 152.9 (ddd,  $J$  = 252.5, 11.1, 2.0), 148.2 (ddd,  $J$  = 253.5, 12.1, 4.0), 142.6, 139.6 (dt,  $J$  = 253.5, 14.1), 139.0-138.9 (m), 137.6-137.4 (m), 130.2, 129.3, 125.3 (dd,  $J$  = 12.1, 3.0), 123.4, 121.2, 115.5, 105.0 (dd,  $J$  = 20.2, 4.0 Hz), 56.8, 53.7, 24.3. IR (ATR): 2925, 2257, 1738, 1246, 746  $\text{cm}^{-1}$ . HRMS (ESI)  $m/z$ :  $[\text{M}+\text{Na}]^+$  Calcd for  $\text{C}_{17}\text{H}_{10}\text{F}_3\text{NNaO}_2$  340.0556; Found 340.0556.

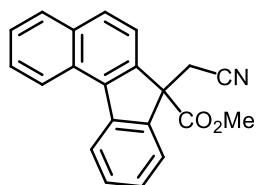

**methyl 7-(cyanomethyl)-7H-benzo[c]fluorene-7-carboxylate (4i).** Following the *General Procedure (II)*, using **1j** (0.14 mmol). The product was purified by flash chromatography on silica gel (petroleum ether/EtOAc, 20:1), 33.7 mg, yield: 77%, white solid, melting point: 171-173 °C. <sup>1</sup>H NMR (400 MHz, CDCl<sub>3</sub>) δ 8.74 (d, *J* = 8.5 Hz, 1H), 8.39 (d, *J* = 7.8 Hz, 1H), 7.97 (d, *J* = 8.2 Hz, 1H), 7.91 (d, *J* = 8.4 Hz, 1H), 7.72-7.65 (m, 3H), 7.58 (t, *J* = 7.6 Hz, 2H), 7.42 (t, *J* = 7.1 Hz, 1H), 3.59 (s, 3H), 3.24 (d, *J* = 2.0 Hz, 2H); <sup>13</sup>C NMR (101 MHz, CDCl<sub>3</sub>) δ 172.0, 143.9, 142.0, 141.5, 136.3, 134.6, 129.64, 129.57, 129.5, 129.4, 127.5, 127.4, 126.4, 124.1, 123.8, 123.7, 120.8, 116.8, 57.5, 53.4, 26.0. IR (ATR): 2920, 2255, 1735, 1242, 755 cm<sup>-1</sup>. HRMS (ESI) *m/z*: [M+Na]<sup>+</sup> Calcd for C<sub>21</sub>H<sub>15</sub>NNaO<sub>2</sub> 336.0995; Found 336.1004.

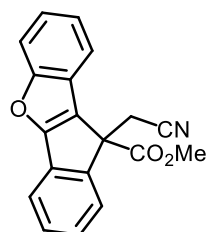

**Methyl 10-(cyanomethyl)-10H-indeno[1,2-b]benzofuran-10-carboxylate (4j).** Following the *General Procedure (II)*, using **1k** (0.1 mmol). The product was purified by flash chromatography on silica gel (petroleum ether/EtOAc, 40:1 to 20:1), 23 mg, yield: 76%, yellow solid, melting point: 106-108 °C. <sup>1</sup>H NMR (400 MHz, CDCl<sub>3</sub>) δ 7.81-7.75 (m, 1H), 7.66-7.58 (m, 3H), 7.47 (t, *J* = 7.7 Hz, 1H), 7.38-7.31 (m, 3H), 3.69 (s, 3H), 3.43 (d, *J* = 16.5 Hz, 1H), 2.92 (d, *J* = 16.4 Hz, 1H); <sup>13</sup>C NMR (101 MHz, CDCl<sub>3</sub>) δ 170.9, 161.5, 159.9, 146.6, 131.9, 129.6, 127.4, 124.6, 124.3, 124.24, 124.20, 124.15, 120.3, 118.8, 117.0, 112.6, 53.6, 53.4, 25.2. IR (ATR): 2956, 2253, 1732, 1239, 746 cm<sup>-1</sup>. HRMS (ESI) *m/z*: [M+Na]<sup>+</sup> Calcd for C<sub>19</sub>H<sub>13</sub>NNaO<sub>3</sub> 326.0788; Found 326.0796.

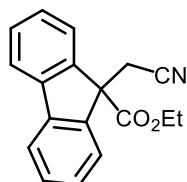

**ethyl 9-(cyanomethyl)-9H-fluorene-9-carboxylate (4k).** Following the *General Procedure (II)*, using **1l** (0.18 mmol). The product was purified by flash chromatography on silica gel (petroleum ether/EtOAc, 40:1 to 20:1), 29.3 mg, yield: 59%, colorless oil. <sup>1</sup>H NMR (400 MHz, CDCl<sub>3</sub>) δ 7.77 (d, *J* = 7.3 Hz, 2H), 7.62 (d, *J* = 7.6 Hz, 2H), 7.47 (t, *J* = 7.5 Hz, 2H), 7.37 (t, *J* = 7.5 Hz, 2H), 4.13 (q, *J* = 7.1 Hz, 2H), 3.13 (s, 2H), 1.10 (t, *J* = 7.1 Hz, 3H); <sup>13</sup>C NMR (101 MHz, CDCl<sub>3</sub>) δ 171.2, 143.2, 140.8, 129.4, 128.2, 124.0, 120.7, 117.0, 62.3, 57.4, 26.4, 13.9. IR (ATR): 2982,

2254, 1725, 1240, 737  $\text{cm}^{-1}$ . HRMS (ESI)  $m/z$ :  $[\text{M}+\text{Na}]^+$  Calcd for  $\text{C}_{18}\text{H}_{15}\text{NNaO}_2$  300.0995; Found 300.1009.

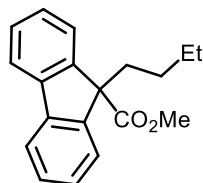

**methyl 9-butyl-9H-fluorene-9-carboxylate (6a).** Following the *General Procedure (II)*, using **1a** (0.15 mmol). The product was purified by flash chromatography on silica gel (petroleum ether/EtOAc, 100:1), 35.5 mg, yield: 85%, colorless oil.  $^1\text{H}$  NMR (400 MHz,  $\text{CDCl}_3$ )  $\delta$  7.71 (d,  $J = 7.5$  Hz, 2H), 7.54 (d,  $J = 7.5$  Hz, 2H), 7.38 (td,  $J = 7.4, 1.2$  Hz, 2H), 7.32 (td,  $J = 7.5, 1.3$  Hz, 2H), 3.58 (s, 3H), 2.37-2.27 (m, 2H), 1.21-1.09 (m, 2H), 0.71 (t,  $J = 7.4$  Hz, 5H);  $^{13}\text{C}$  NMR (101 MHz,  $\text{CDCl}_3$ )  $\delta$  174.3, 145.5, 141.0, 128.0, 127.5, 124.6, 120.0, 61.5, 52.6, 37.3, 25.8, 22.8, 13.8. IR (ATR): 2954, 1726, 1448, 1233, 741  $\text{cm}^{-1}$ . HRMS (ESI)  $m/z$ :  $[\text{M}+\text{Na}]^+$  Calcd for  $\text{C}_{19}\text{H}_{20}\text{NaO}_2$  303.1356; Found 303.1363.

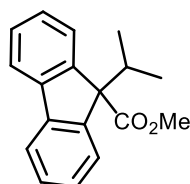

**methyl 9-isopropyl-9H-fluorene-9-carboxylate (6b).** Following the *General Procedure (II)*, the product was purified by flash chromatography on silica gel (petroleum ether/EtOAc, 100:1), 21.7 mg, yield: 41%, white solid, melting point: 83-85  $^{\circ}\text{C}$ .  $^1\text{H}$  NMR (400 MHz,  $\text{CDCl}_3$ )  $\delta$  7.70 (d,  $J = 7.5$  Hz, 2H), 7.65 (d,  $J = 7.5$  Hz, 2H), 7.39 (td,  $J = 7.4, 1.2$  Hz, 2H), 7.32 (td,  $J = 7.5, 1.3$  Hz, 2H), 3.67 (s, 3H), 2.99-2.88 (m, 1H), 0.72 (d,  $J = 6.8$  Hz, 6H);  $^{13}\text{C}$  NMR (101 MHz,  $\text{CDCl}_3$ )  $\delta$  173.8, 144.2, 141.2, 128.0, 127.2, 125.7, 119.7, 66.1, 52.4, 36.9, 17.8. IR (ATR): 2971, 1720, 1240, 741  $\text{cm}^{-1}$ . HRMS (ESI)  $m/z$ :  $[\text{M}+\text{Na}]^+$  Calcd for  $\text{C}_{18}\text{H}_{18}\text{NaO}_2$  289.1199; Found 289.1211.

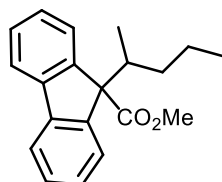

**methyl 9-(pentan-2-yl)-9H-fluorene-9-carboxylate (6c).** Following the *General Procedure (II)*, using **1a** (0.15 mmol). The product was purified by flash chromatography on silica gel (petroleum ether/EtOAc, 100:1), 23.1 mg, yield: 52%, yellow oil.  $^1\text{H}$  NMR (400 MHz,  $\text{CDCl}_3$ )  $\delta$  7.70 (d,  $J = 7.5$  Hz, 2H), 7.64 (t,  $J = 7.4$  Hz, 2H), 7.39 (tt,  $J = 7.5, 1.3$  Hz, 2H), 7.31 (t,  $J = 7.5$  Hz, 2H), 3.66 (s, 3H), 2.78-2.68 (m, 1H), 1.39-1.30 (m, 1H), 1.20-1.06 (m, 2H), 1.00-0.89 (m, 1H), 0.79 (t,  $J = 7.1$  Hz, 3H), 0.66 (d,  $J = 6.8$  Hz, 3H);  $^{13}\text{C}$  NMR (101 MHz,  $\text{CDCl}_3$ )  $\delta$  173.9, 144.6,

144.1, 141.4, 141.2, 127.9, 127.23, 127.16, 125.9, 125.6, 119.7, 119.6, 66.5, 52.4, 41.3, 34.3, 20.9, 14.6, 14.1. IR (ATR): 2957, 1725, 1448, 1233, 743  $\text{cm}^{-1}$ . HRMS (ESI)  $m/z$ :  $[\text{M}+\text{Na}]^+$  Calcd for  $\text{C}_{20}\text{H}_{22}\text{NaO}_2$  317.1512; Found 317.1527.

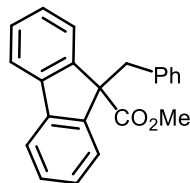

**methyl 9-benzyl-9H-fluorene-9-carboxylate (6d).** Following the *General Procedure (II)*, using **1a** (0.15 mmol). The product was purified by flash chromatography on silica gel (petroleum ether/EtOAc, 100:1), 35.4 mg, yield: 75%, white solid, melting point: 103-106  $^{\circ}\text{C}$ .  $^1\text{H}$  NMR (400 MHz,  $\text{CDCl}_3$ )  $\delta$  7.58 (d,  $J$  = 7.4 Hz, 2H), 7.45 (d,  $J$  = 7.7 Hz, 2H), 7.33 (td,  $J$  = 7.4, 1.3 Hz, 2H), 7.28 (td,  $J$  = 7.4, 1.3 Hz, 2H), 7.07-6.95 (m, 3H), 6.75-6.69 (m, 2H), 3.63 (s, 3H), 3.53 (s, 2H);  $^{13}\text{C}$  NMR (101 MHz,  $\text{CDCl}_3$ )  $\delta$  173.8, 144.6, 140.8, 136.2, 130.3, 128.1, 127.4, 127.1, 126.5, 125.6, 119.9, 62.4, 52.7, 43.9. IR (ATR): 2954, 2925, 2102, 1724, 1449, 1236, 742, 699  $\text{cm}^{-1}$ . HRMS (ESI)  $m/z$ :  $[\text{M}+\text{Na}]^+$  Calcd for  $\text{C}_{22}\text{H}_{18}\text{NaO}_2$  337.1199; Found 337.1206.

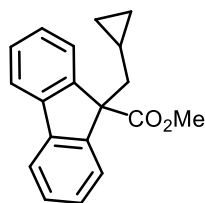

**methyl 9-(cyclopropylmethyl)-9H-fluorene-9-carboxylate (6e).** Following the *General Procedure (II)*, the product was purified by flash chromatography on silica gel (petroleum ether/EtOAc, 100:1), 37.1 mg, yield: 67%, yellow oil.  $^1\text{H}$  NMR (400 MHz,  $\text{CDCl}_3$ )  $\delta$  7.88 (d,  $J$  = 7.2 Hz, 2H), 7.77 (d,  $J$  = 7.6 Hz, 2H), 7.55 (td,  $J$  = 7.5, 1.3 Hz, 2H), 7.47 (td,  $J$  = 7.5, 1.2 Hz, 2H), 3.76 (s, 3H), 2.40 (d,  $J$  = 6.8 Hz, 2H), 0.50-0.39 (m, 1H), 0.30-0.25 (m, 2H), 0.02-0.03 (m, 2H);  $^{13}\text{C}$  NMR (101 MHz,  $\text{CDCl}_3$ )  $\delta$  174.1, 145.6, 140.9, 128.0, 127.2, 125.2, 119.9, 61.8, 52.5, 42.9, 6.6, 4.4. IR (ATR): 2999, 1725, 1448, 1235, 741  $\text{cm}^{-1}$ . HRMS (ESI)  $m/z$ :  $[\text{M}+\text{Na}]^+$  Calcd for  $\text{C}_{19}\text{H}_{18}\text{NaO}_2$  301.1199; Found 301.1216.

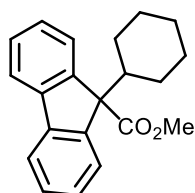

**methyl 9-cyclohexyl-9H-fluorene-9-carboxylate (6f).** Following the *General Procedure (II)*, the product was purified by flash chromatography on silica gel (petroleum ether/EtOAc, 100:1), 43.7 mg, yield: 71%, yellow solid, melting point: 129-131  $^{\circ}\text{C}$ .  $^1\text{H}$  NMR (400 MHz,  $\text{CDCl}_3$ )  $\delta$  7.68 (t,  $J$  = 7.3 Hz, 4H), 7.38 (td,  $J$  = 7.4, 1.3 Hz, 2H), 7.32 (td,  $J$  = 7.4, 1.4 Hz, 2H), 3.66 (s, 3H),

2.53 (tt,  $J = 12.0, 2.9$  Hz, 1H), 1.65-1.52 (m, 3H), 1.34 (d,  $J = 11.4$  Hz, 2H), 1.26-1.12 (m, 2H), 1.03-0.81 (m, 3H);  $^{13}\text{C}$  NMR (101 MHz,  $\text{CDCl}_3$ )  $\delta$  173.6, 144.4, 141.2, 128.0, 127.2, 126.0, 119.6, 66.1, 52.4, 47.5, 28.0, 26.7, 26.3. IR (ATR): 2923, 1716, 1446, 1234, 738  $\text{cm}^{-1}$ . HRMS (ESI)  $m/z$ :  $[\text{M}+\text{Na}]^+$  Calcd for  $\text{C}_{21}\text{H}_{22}\text{NaO}_2$  329.1512; Found 329.1522.

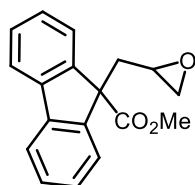

**methyl 9-(oxiran-2-ylmethyl)-9H-fluorene-9-carboxylate (6g).** Following the *General Procedure (II)*, the product was purified by flash chromatography on silica gel (petroleum ether/EtOAc, 50:1 to 20:1), 34.4 mg, yield: 61%, colorless oil.  $^1\text{H}$  NMR (400 MHz,  $\text{CDCl}_3$ )  $\delta$  7.75 (dd,  $J = 7.5, 2.8$  Hz, 2H), 7.58 (dd,  $J = 16.4, 7.5$  Hz, 2H), 7.43 (tdd,  $J = 7.5, 4.2, 1.2$  Hz, 2H), 7.39-7.31 (m, 2H), 3.60 (s, 3H), 2.74-2.65 (m, 1H), 2.47-2.35 (m, 3H), 2.19 (dd,  $J = 5.0, 2.5$  Hz, 1H);  $^{13}\text{C}$  NMR (101 MHz,  $\text{CDCl}_3$ )  $\delta$  173.5, 144.7, 144.6, 141.0, 140.8, 128.5, 127.7, 127.6, 124.9, 124.6, 120.27, 120.25, 59.8, 52.8, 48.5, 47.0, 40.2. IR (ATR): 2995, 1727, 1449, 1238, 741  $\text{cm}^{-1}$ . HRMS (ESI)  $m/z$ :  $[\text{M}+\text{Na}]^+$  Calcd for  $\text{C}_{18}\text{H}_{16}\text{NaO}_3$  303.0992; Found 303.1007.

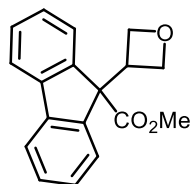

**methyl 9-(oxetan-3-yl)-9H-fluorene-9-carboxylate (6h).** Following the *General Procedure (II)*, the product was purified by flash chromatography on silica gel (petroleum ether/EtOAc, 50:1 to 30:1), 32.2 mg, yield: 57%, white solid, melting point: 125-127  $^{\circ}\text{C}$ .  $^1\text{H}$  NMR (400 MHz,  $\text{CDCl}_3$ )  $\delta$  7.76 (d,  $J = 7.5$  Hz, 2H), 7.60 (d,  $J = 7.5$  Hz, 2H), 7.45 (td,  $J = 7.4, 1.2$  Hz, 2H), 7.36 (td,  $J = 7.5, 1.2$  Hz, 2H), 4.62 (dd,  $J = 8.3, 6.6$  Hz, 2H), 4.31 (t,  $J = 6.7$  Hz, 2H), 4.15-4.05 (m, 1H), 3.59 (s, 3H);  $^{13}\text{C}$  NMR (101 MHz,  $\text{CDCl}_3$ )  $\delta$  173.1, 143.0, 141.3, 128.8, 127.9, 125.0, 120.3, 73.4, 61.2, 52.7, 41.2. IR (ATR): 2952, 1721, 1432, 1241, 745  $\text{cm}^{-1}$ . HRMS (ESI)  $m/z$ :  $[\text{M}+\text{Na}]^+$  Calcd for  $\text{C}_{18}\text{H}_{16}\text{NaO}_3$  303.0992; Found 303.1001.

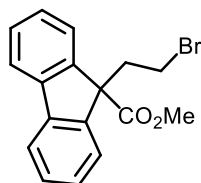

**methyl 9-(2-bromoethyl)-9H-fluorene-9-carboxylate (6i).** Following the *General Procedure (II)*, the product was purified by flash chromatography on silica gel (petroleum ether/EtOAc, 50:1 to 10:1), 32.4 mg, yield: 49%, yellow solid, melting point: 87-89  $^{\circ}\text{C}$ .  $^1\text{H}$  NMR

(400 MHz, CDCl<sub>3</sub>)  $\delta$  7.73 (d,  $J$  = 7.5 Hz, 2H), 7.54 (d,  $J$  = 7.5 Hz, 2H), 7.43 (td,  $J$  = 7.5, 1.2 Hz, 2H), 7.35 (td,  $J$  = 7.4, 1.2 Hz, 2H), 3.60 (s, 3H), 2.99-2.91 (m, 2H), 2.75-2.67 (m, 2H); <sup>13</sup>C NMR (101 MHz, CDCl<sub>3</sub>)  $\delta$  173.0, 143.7, 141.0, 128.7, 128.0, 124.4, 120.4, 61.3, 52.9, 40.2, 27.2. IR (ATR): 2951, 1727, 1449, 1240, 742 cm<sup>-1</sup>. HRMS (ESI)  $m/z$ : [M<sub>Br</sub><sup>79</sup>+Na]<sup>+</sup> Calcd for C<sub>17</sub>H<sub>15</sub>BrNaO<sub>2</sub> 353.0148, Found 353.0150; [M<sub>Br</sub><sup>81</sup>+Na]<sup>+</sup> Calcd for C<sub>17</sub>H<sub>15</sub>BrNaO<sub>2</sub> 355.0127, Found 355.0134.

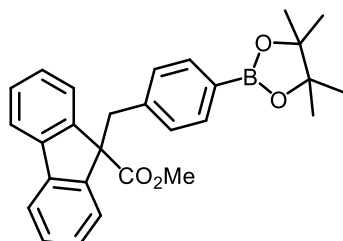

**methyl 9-(4-(4,4,5,5-tetramethyl-1,3,2-dioxaborolan-2-yl)benzyl)-9H-fluorene-9-carboxylate (6j).** Following the *General Procedure (II)*, the product was purified by flash chromatography on silica gel (petroleum ether/EtOAc, 80:1 to 50:1), 44.1 mg, yield: 50%, white solid, melting point: 141-143 °C. <sup>1</sup>H NMR (400 MHz, CDCl<sub>3</sub>)  $\delta$  7.59 (d,  $J$  = 7.7 Hz, 2H), 7.47-7.42 (m, 4H), 7.33 (td,  $J$  = 7.4, 1.3 Hz, 2H), 7.27 (td,  $J$  = 7.5, 1.3 Hz, 2H), 6.76 (d,  $J$  = 8.0 Hz, 2H), 3.62 (s, 3H), 3.54 (s, 2H), 1.29 (s, 12H); <sup>13</sup>C NMR (101 MHz, CDCl<sub>3</sub>)  $\delta$  173.7, 144.5, 140.7, 139.5, 134.0, 129.7, 128.1, 127.1, 125.6, 120.0, 83.7, 62.3, 52.7, 44.0, 24.9. IR (ATR): 2980, 1733, 1357, 1230, 731 cm<sup>-1</sup>. HRMS (ESI)  $m/z$ : [M+Na]<sup>+</sup> Calcd for C<sub>28</sub>H<sub>29</sub>BNaO<sub>4</sub> 463.2051; Found 463.2054.

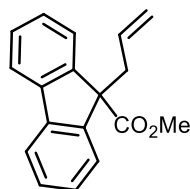

**methyl 9-allyl-9H-fluorene-9-carboxylate (6k).** Following the *General Procedure (II)*, using **1a** (0.15 mmol). The product was purified by flash chromatography on silica gel (petroleum ether/EtOAc, 100:1), 36.9 mg, yield: 93%, white solid, melting point: 75-77 °C. <sup>1</sup>H NMR (400 MHz, CDCl<sub>3</sub>)  $\delta$  7.71 (d,  $J$  = 7.5 Hz, 2H), 7.56 (d,  $J$  = 7.5 Hz, 2H), 7.39 (td,  $J$  = 7.5, 1.3 Hz, 2H), 7.32 (td,  $J$  = 7.5, 1.3 Hz, 2H), 5.35-5.23 (m, 1H), 4.92-4.79 (m, 2H), 3.59 (s, 3H), 3.03 (d,  $J$  = 7.2 Hz, 2H); <sup>13</sup>C NMR (101 MHz, CDCl<sub>3</sub>)  $\delta$  173.6, 144.9, 140.9, 132.6, 128.2, 127.4, 124.9, 120.0, 118.8, 61.0, 52.6, 41.9. IR (ATR): 2952, 2923, 1721, 1448, 1237, 743 cm<sup>-1</sup>. HRMS (ESI)  $m/z$ : [M+Na]<sup>+</sup> Calcd for C<sub>18</sub>H<sub>16</sub>NaO<sub>2</sub> 287.1043; Found 287.1055.

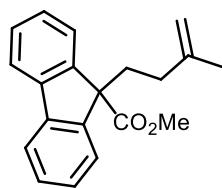

**methyl 9-(3-methylbut-3-en-1-yl)-9H-fluorene-9-carboxylate (6l).** Following the *General Procedure (II)*, the product was purified by flash chromatography on silica gel (petroleum ether/EtOAc, 100:1), 10.7 mg, yield: 18%, yellow solid, melting point: 84-87 °C. <sup>1</sup>H NMR (400 MHz, CDCl<sub>3</sub>) δ 7.73 (d, *J* = 7.6 Hz, 2H), 7.55 (d, *J* = 7.6 Hz, 2H), 7.41 (td, *J* = 7.5, 1.2 Hz, 2H), 7.34 (td, *J* = 7.5, 1.2 Hz, 2H), 4.59 (s, 1H), 4.53 (s, 1H), 3.60 (s, 3H), 2.53-2.46 (m, 2H), 1.55 (s, 3H), 1.42-1.35 (m, 2H); <sup>13</sup>C NMR (101 MHz, CDCl<sub>3</sub>) δ 145.2, 145.1, 141.1, 128.1, 127.6, 124.5, 120.0, 109.7, 61.2, 52.6, 35.4, 31.5, 22.6. IR (ATR): 2951, 1723, 1448, 1233, 735 cm<sup>-1</sup>. HRMS (ESI) *m/z*: [M+Na]<sup>+</sup> Calcd for C<sub>20</sub>H<sub>20</sub>NaO<sub>2</sub> 315.1356; Found 315.1366.

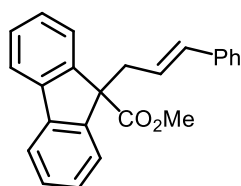

**methyl 9-cinnamyl-9H-fluorene-9-carboxylate (6m).** Following the *General Procedure (II)*, the product was purified by flash chromatography on silica gel (petroleum ether/EtOAc, 100:1), 48.9 mg, yield: 72%, colorless oil. <sup>1</sup>H NMR (400 MHz, CDCl<sub>3</sub>) δ 7.70 (d, *J* = 7.5 Hz, 2H), 7.58 (d, *J* = 7.5 Hz, 2H), 7.37 (td, *J* = 7.4, 1.2 Hz, 2H), 7.30 (td, *J* = 7.5, 1.2 Hz, 2H), 7.23-7.10 (m, 5H), 6.23 (d, *J* = 15.8 Hz, 1H), 5.89-5.80 (m, 1H), 3.60 (s, 3H), 3.11 (dd, *J* = 7.5, 1.4 Hz, 2H); <sup>13</sup>C NMR (101 MHz, CDCl<sub>3</sub>) δ 173.6, 145.0, 140.8, 137.3, 133.9, 128.5, 128.3, 127.5, 127.2, 126.2, 125.1, 124.7, 120.1, 61.4, 52.7, 41.5. IR (ATR): 2949, 1723, 1448, 1237, 745 cm<sup>-1</sup>. HRMS (ESI) *m/z*: [M+Na]<sup>+</sup> Calcd for C<sub>24</sub>H<sub>20</sub>NaO<sub>2</sub> 363.1356; Found 363.1368.

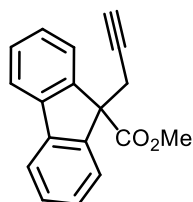

**methyl 9-(prop-2-yn-1-yl)-9H-fluorene-9-carboxylate (6n).** Following the *General Procedure (II)*, the product was purified by flash chromatography on silica gel (petroleum ether/EtOAc, 80:1), 19.4 mg, yield: 37%, white solid, melting point: 119-121 °C. <sup>1</sup>H NMR (400 MHz, CDCl<sub>3</sub>) δ 7.74 (d, *J* = 7.5 Hz, 2H), 7.70 (d, *J* = 7.6 Hz, 2H), 7.43 (td, *J* = 7.5, 1.2 Hz, 2H), 7.34 (td, *J* = 7.5, 1.2 Hz, 2H), 3.63 (s, 3H), 3.03 (d, *J* = 2.7 Hz, 2H), 1.93 (t, *J* = 2.6 Hz, 1H); <sup>13</sup>C NMR (101 MHz, CDCl<sub>3</sub>) δ 172.7, 144.5, 140.8, 128.7, 127.7, 124.7, 120.1, 80.3, 70.6, 59.5, 52.9, 28.1. IR (ATR): 3283, 2996, 1715, 1247, 746 cm<sup>-1</sup>. HRMS (ESI) *m/z*: [M+Na]<sup>+</sup> Calcd for C<sub>18</sub>H<sub>14</sub>NaO<sub>2</sub> 285.0886; Found 285.0894.

### Procedure for Scale-Up Reaction

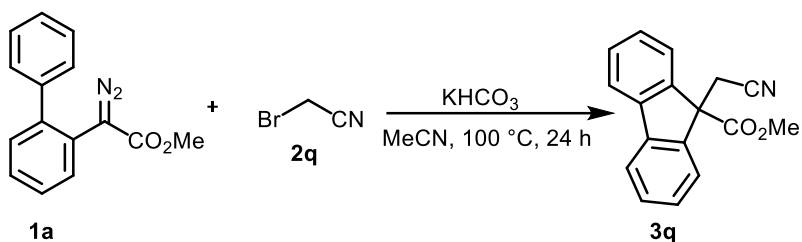

$\text{KHCO}_3$  (4.0 mmol, 400 mg) was weighed into a Schlenk tube. The reaction vessel was capped and subjected to three vacuum-purge/nitrogen-flush cycles. Then methyl 2-([1,1'-biphenyl]-2-yl)-2-diazoacetate **1a** (4.0 mmol, 1.0 g) and 2-bromoacetonitrile **2q** (6.0 mmol, 708 mg) in MeCN (8 mL) were added through the side-arm by syringe. The reaction was stirred under nitrogen at  $100\text{ }^\circ\text{C}$  for 24 h. After reaction, the mixture was cooled to room temperature. Water (50 mL) was added to the above solution, and the mixture was extracted with EtOAc (50 mL  $\times$  3). The organic layer was washed with saturated brine (30 mL) and dried over  $\text{Na}_2\text{SO}_4$ . Volatile solvent and reagents were removed by rotary evaporation and the residue was purified by silica gel flash chromatography using petroleum ether/EtOAc (50:1 to 20:1) to afford the desired product **3q**, 870.8 mg, 75% yield.

### Reduction with $\text{LiAlH}_4$

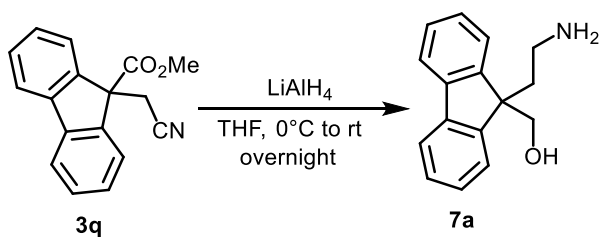

Methyl 9-(cyanomethyl)-9H-fluorene-9-carboxylate **3a** (0.7 mmol, 200 mg) and  $\text{LiAlH}_4$  (2.1 mmol, 78 mg) were weighed into a Schlenk tube, then THF was added through the side-arm by syringe at  $0\text{ }^\circ\text{C}$  under  $\text{N}_2$ . The mixture was stirred at room temperature overnight. After reaction, water (5 mL) was added, and it was extracted with EtOAc (10 mL  $\times$  3), washed with saturated brine (20 mL), and dried over anhydrous  $\text{Na}_2\text{SO}_4$ . After filtration, the filtrate was concentrated under reduced pressure and the residue was purified by silica gel flash chromatography using  $\text{CH}_2\text{Cl}_2/\text{MeOH}$  (10:1) to afford the desired product **7a**, 131.0 mg, yield: 78%.

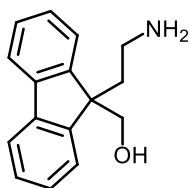

**(9-(2-aminoethyl)-9H-fluoren-9-yl)methanol (7a)**. Yellow oil.  $^1\text{H}$  NMR (400 MHz,  $\text{CDCl}_3$ )  $\delta$  7.73 (d,  $J = 7.5$  Hz, 2H), 7.52 (d,  $J = 7.4$  Hz, 2H), 7.37 (t,  $J = 7.4$  Hz, 2H), 7.30 (t,  $J = 7.4$  Hz, 2H), 3.73 (s, 2H), 2.91 (s, 3H), 2.47 (t,  $J = 6.9$  Hz, 2H), 2.19 (t,  $J = 6.9$  Hz, 2H);  $^{13}\text{C}$  NMR (101 MHz,  $\text{CDCl}_3$ )  $\delta$  148.0, 140.6, 127.8, 127.3, 124.1, 120.2, 69.0, 55.6, 37.6. IR (ATR): 3288, 2924, 1447, 735  $\text{cm}^{-1}$ . HRMS (ESI)  $m/z$ :  $[\text{M}+\text{Na}]^+$  Calcd for  $\text{C}_{16}\text{H}_{18}\text{NO}$  240.1383; Found 240.1396.

## References

1. Kim, J.; Ohk, Y.; Park, S. H.; Jung, Y.; Chang, S. *Chem. Asian J.* **2011**, *6*, 2040.
2. Zeng, T.; Zhang, H.-Y.; Xie, Z.-B.; Dong, Y.-Y. Gong, S.-S; Sun, Q. *Asian. J. Org. Chem.* **2023**, *12*, e202200638.
3. Lu, L.; Chen, C.; Jiang H.; Yin B. *J. Org. Chem.* **2018**, *83*, 14385.

## NMR Spectra Images of Starting Materials and Products

$^1\text{H}$  NMR of compound **1a** (400 MHz in  $\text{CDCl}_3$ )

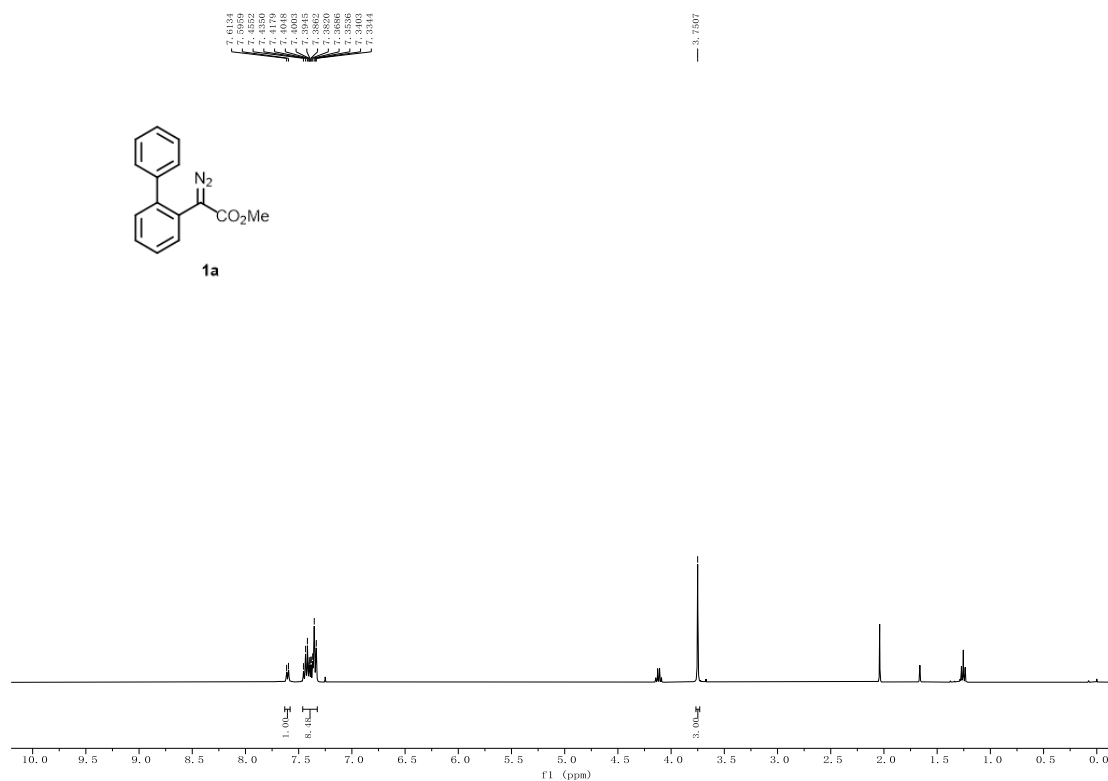

$^1\text{H}$  NMR of compound **1b** (400 MHz in  $\text{CDCl}_3$ )

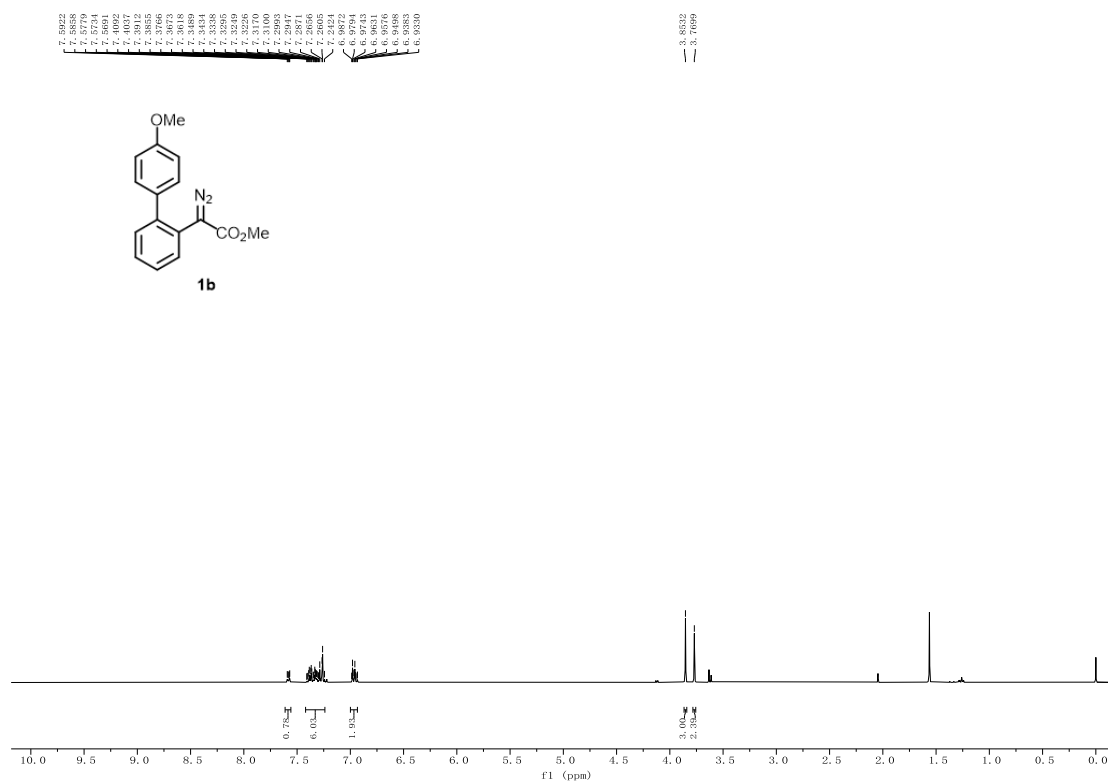

**<sup>1</sup>H NMR of compound 1c (400 MHz in CDCl<sub>3</sub>)**

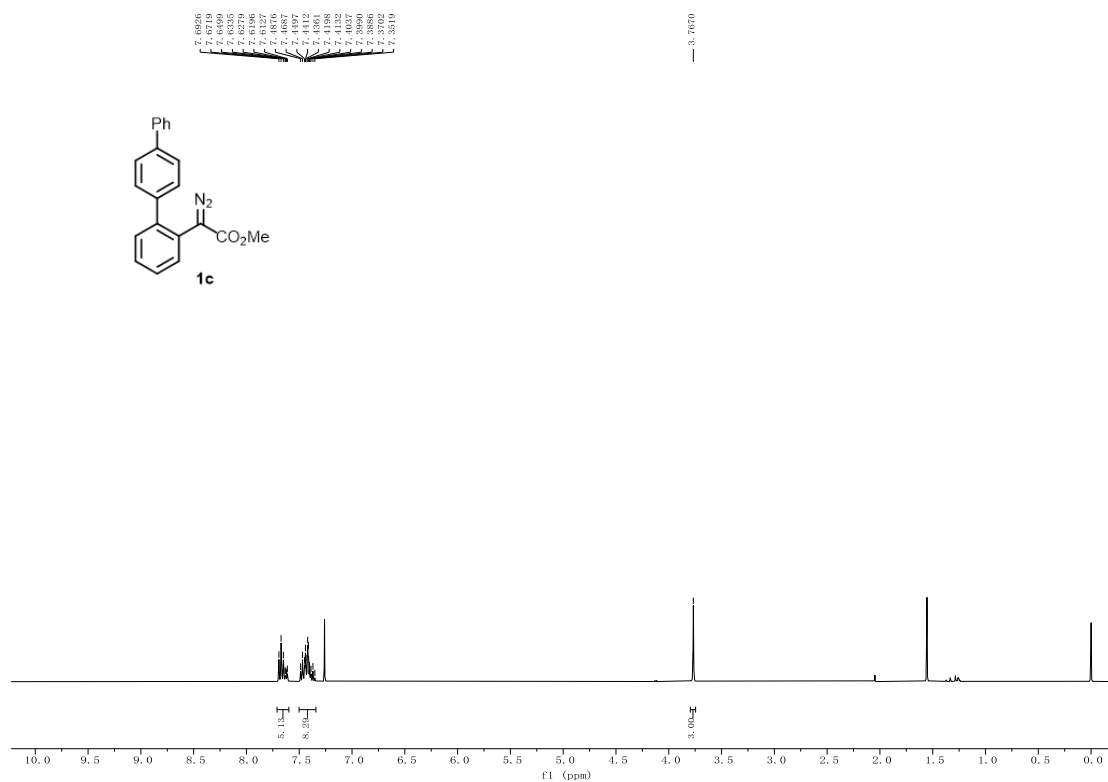

**<sup>1</sup>H NMR of compound 1d (400 MHz in CDCl<sub>3</sub>)**

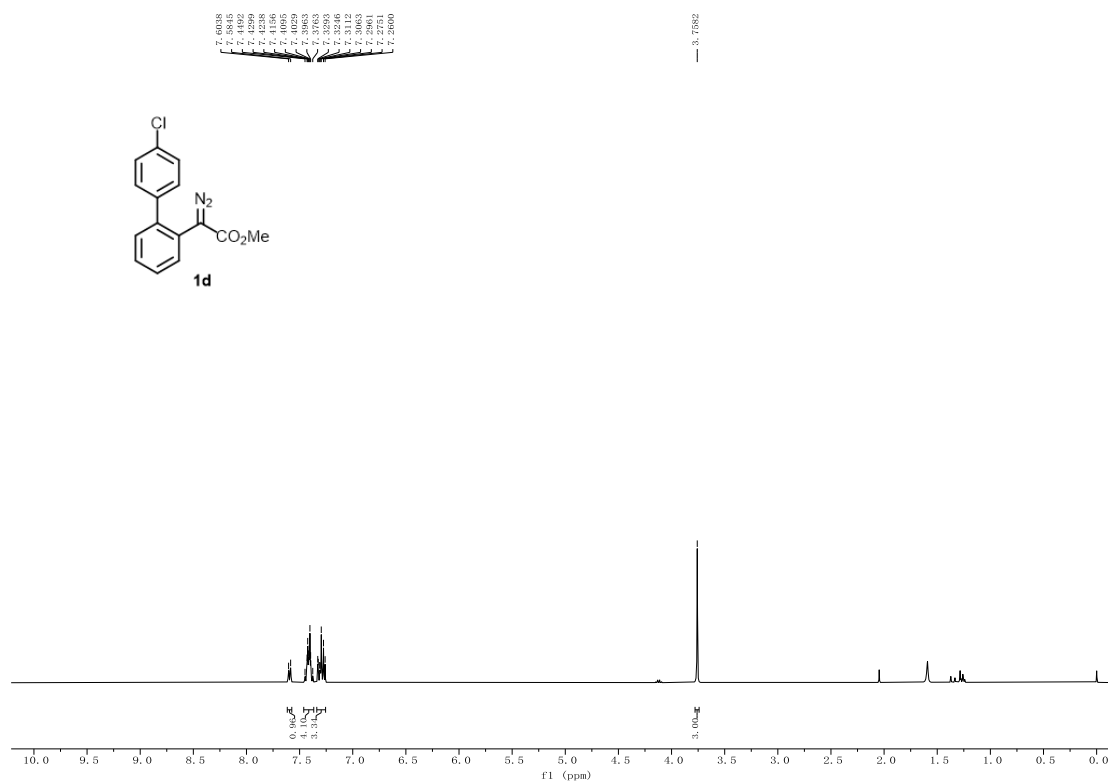

**1e**

CCOC(=O)C(=N2)C(=C3C=CC=C(C=C3)C4=CC=C(C=C4)C(=O)OCC)N2

1.088  
0.988  
5.200  
2.088  
3.000  
3.098

8.1324  
8.1115  
7.6306  
7.6122  
7.6075  
7.6066  
7.6145  
7.4322  
7.4374  
7.4372  
7.4212  
7.4167  
7.3886  
7.3725  
7.3511  
7.3493

4.4349  
4.4171  
4.3994  
4.3816

1.4690  
1.4500  
1.4044

3.7472

Chemical structure of **1f** is shown as an inset. The structure is a biphenyl derivative with a trifluoromethyl group ( $\text{CF}_3$ ) on the para position of the top ring, and a diazomethyl ester group ( $-\text{CH}=\text{N}_2-\text{CO}_2\text{Me}$ ) on the ortho position of the bottom ring.

$^1\text{H}$  NMR spectrum (CDCl<sub>3</sub>) of compound **1f**. The x-axis represents the chemical shift in ppm, ranging from 0.0 to 10.0. The spectrum shows several peaks, with integration values indicated below the baseline: 2.10, 1.14, 4.31, 1.28, 1.28, 3.00, and 1.00. A list of chemical shifts ( $\delta$ ) in ppm is provided at the top: 7.7148, 7.6204, 7.6114, 7.5994, 7.5954, 7.5888, 7.5854, 7.4609, 7.4319, 7.4244, 7.4171, 7.4131, 7.4092, 7.3815, 7.3781, 7.3607, 7.3528, 7.3428, and 7.3379. A solvent peak for CDCl<sub>3</sub> is marked at 7.26 ppm.

**$^{19}\text{F}$  NMR of compound **1f** (377 MHz in  $\text{CDCl}_3$ )**

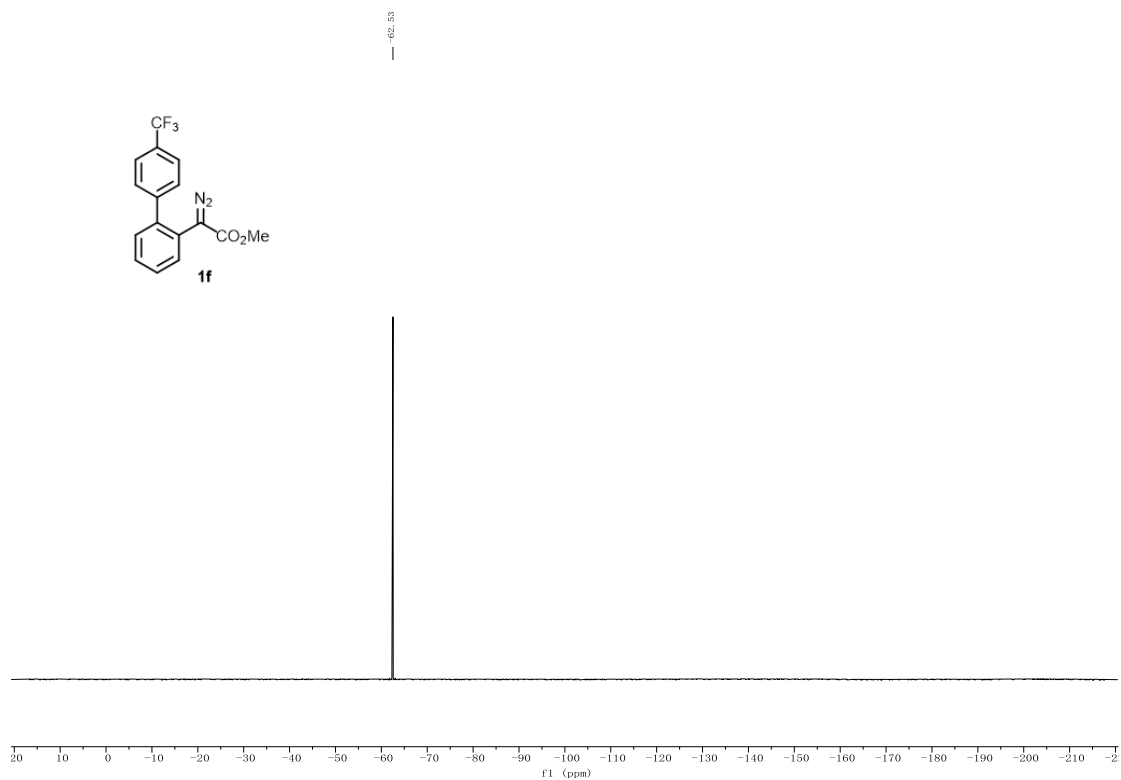

**$^1\text{H}$  NMR of compound **1g** (400 MHz in  $\text{CDCl}_3$ )**

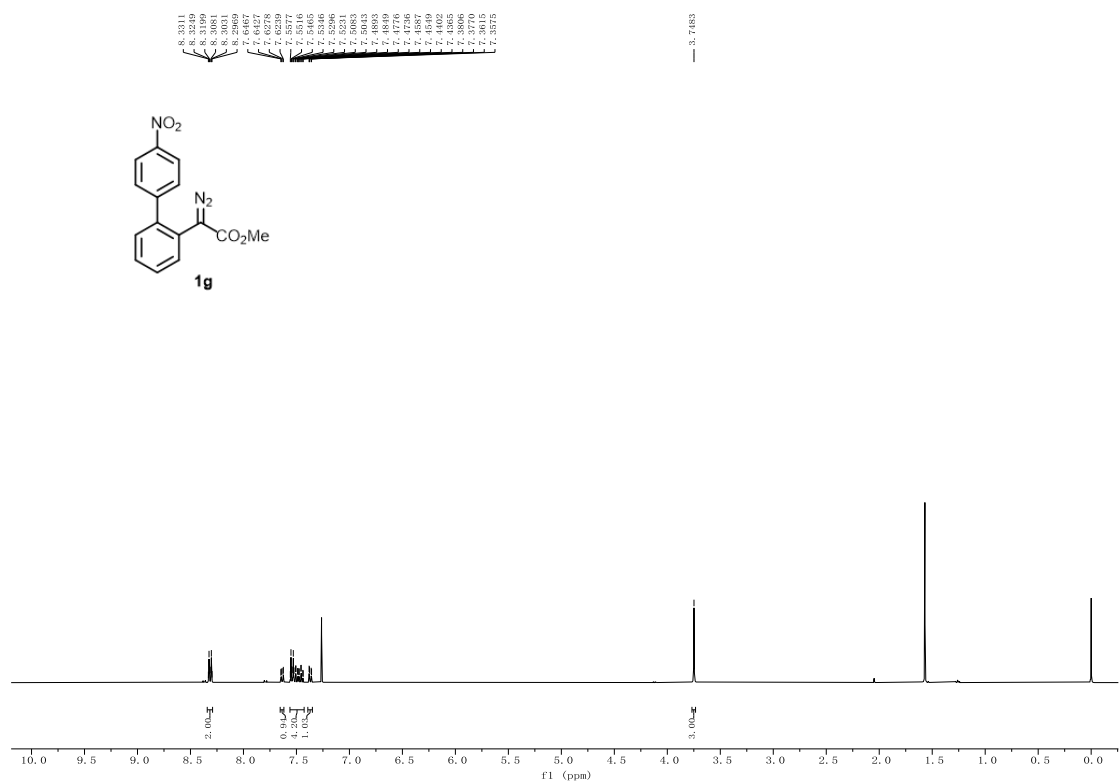

Cc1ccc(cc1C(=N2C(=O)OC)C3=CC=CC=C3)C4=CC=C(C)C=C4
  
**1h**
  
<sup>1</sup>H NMR spectrum (CDCl<sub>3</sub>) showing peaks at δ 7.6013, 7.5814, 7.4132, 7.3901, 7.3952, 7.3721, 7.3598, 7.3377, 7.3117, 7.2952, 7.2115, 6.8995, 6.8421, 3.7735, and 2.3437. Integration values are 0.96, 3.25, 1.07, 1.97, 3.00, and 6.24.

Chemical structure of **1i** is shown above the spectrum. The structure is a benzene ring substituted with a diazo group ( $N_2$ ) and a  $CO_2Me$  group, and a 2,4,6-trifluorophenyl group.

<sup>1</sup>H NMR spectrum (CDCl<sub>3</sub>) of compound **1i**. The x-axis represents the chemical shift in ppm, ranging from 0.0 to 10.0. The spectrum shows several peaks corresponding to the protons in the molecule. Integration values are provided below the peaks: 0.96, 1.00, 1.91, and 3.00. The peak at approximately 3.8 ppm is the most prominent, corresponding to the methoxy protons of the  $CO_2Me$  group.

**$^{19}\text{F}$  NMR of compound **1i** (377 MHz in  $\text{CDCl}_3$ )**

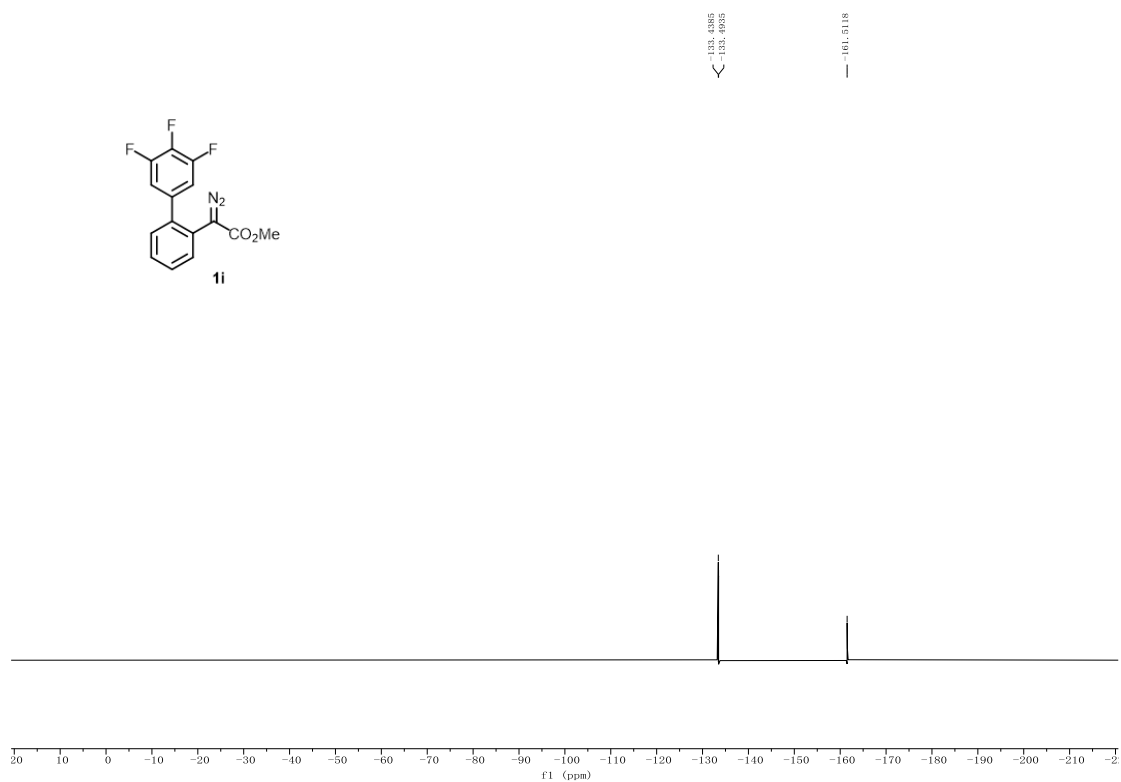

**$^1\text{H}$  NMR of compound **1j** (400 MHz in  $\text{CDCl}_3$ )**

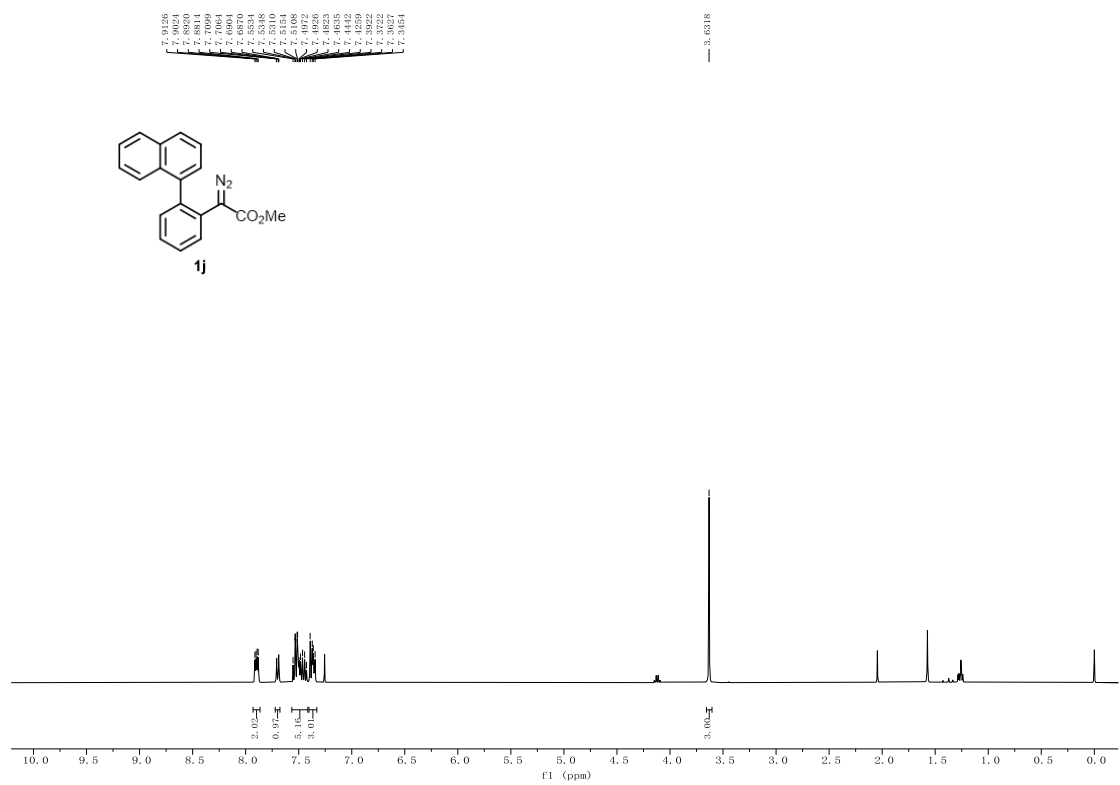

**<sup>1</sup>H NMR of compound 1k (400 MHz in CDCl<sub>3</sub>)**

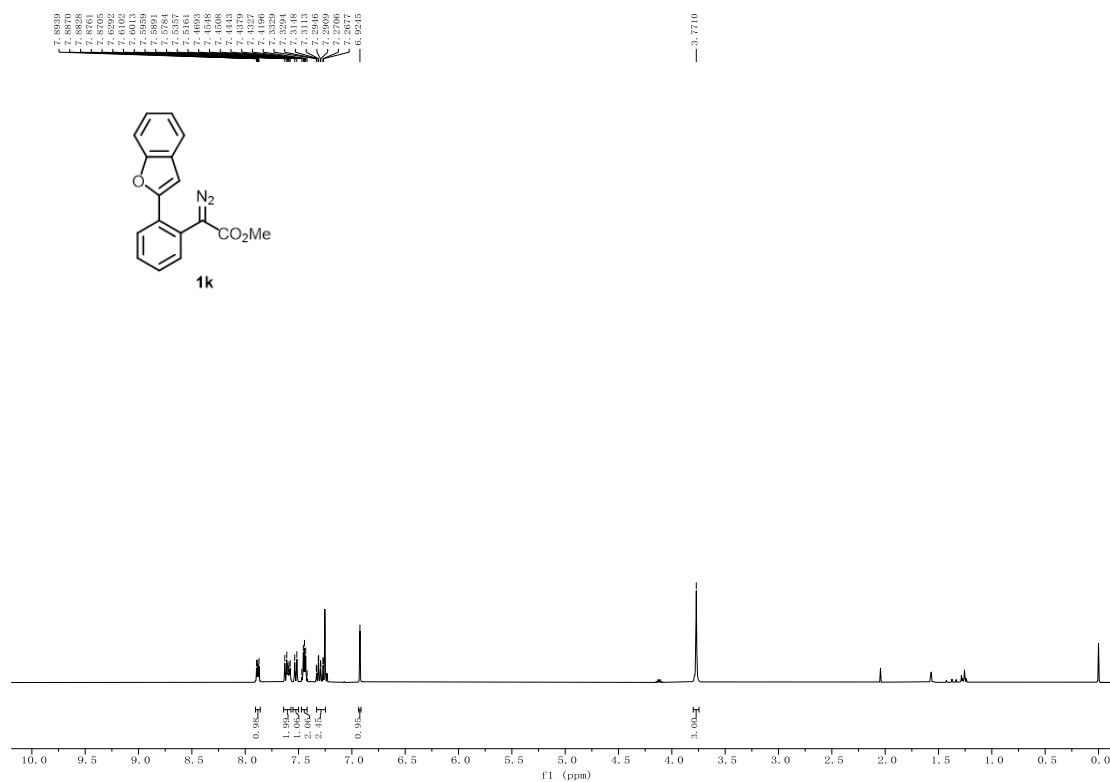

**<sup>13</sup>C NMR of compound 1k (101 MHz in CDCl<sub>3</sub>)**

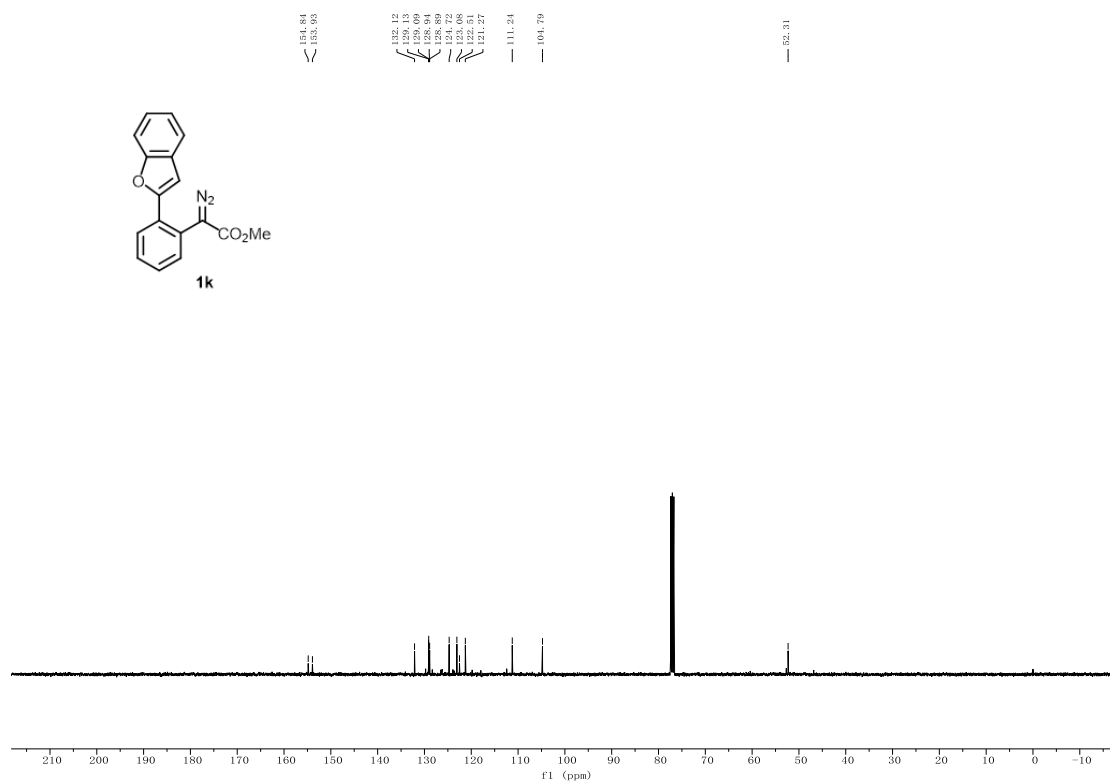

**<sup>1</sup>H NMR of compound 1I (400 MHz in CDCl<sub>3</sub>)**

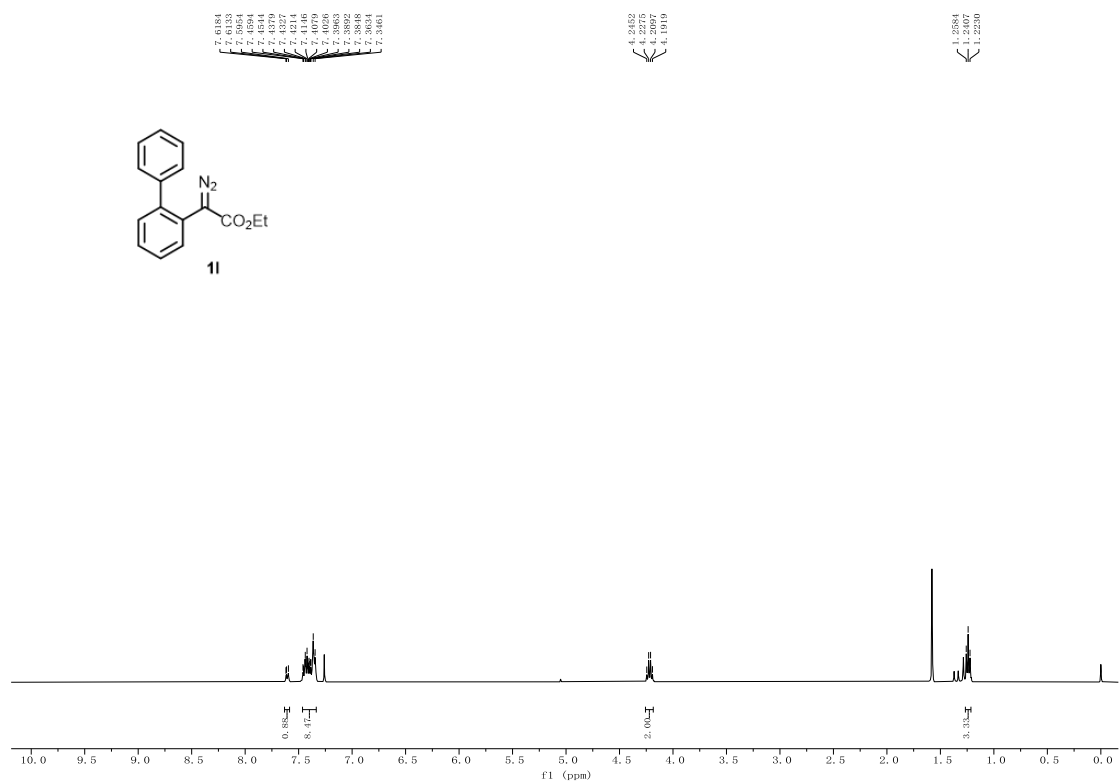

**<sup>1</sup>H NMR of compound 3a (400 MHz in CDCl<sub>3</sub>)**

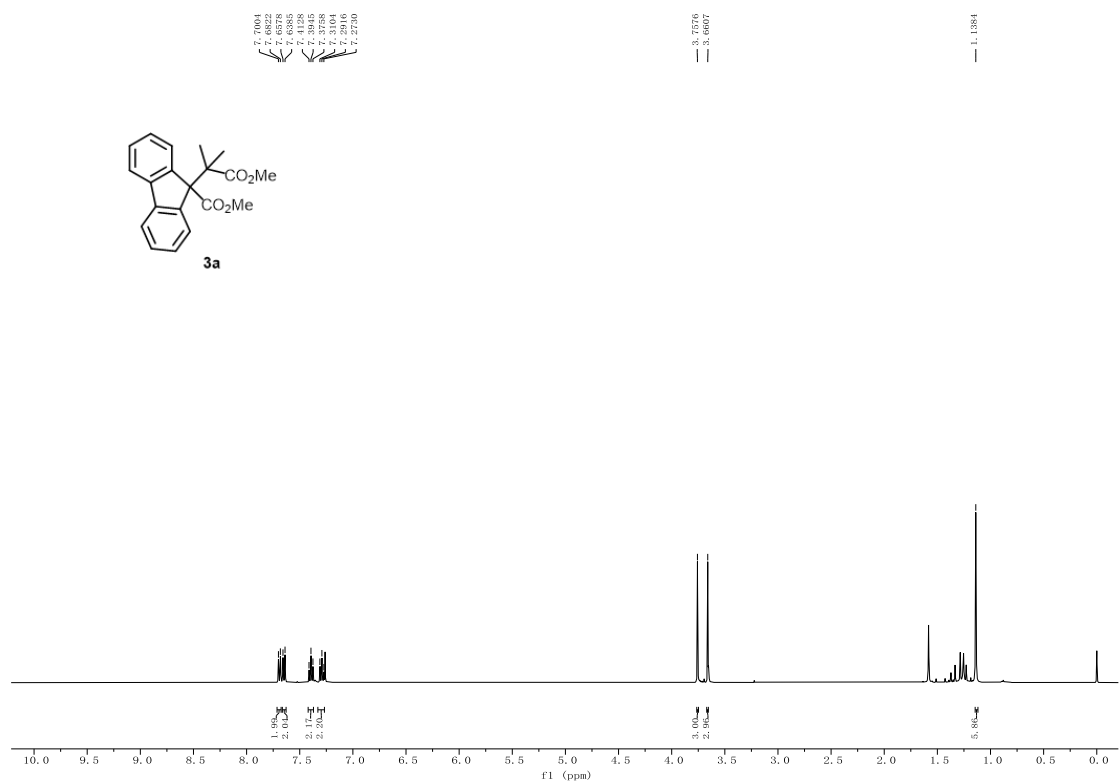

**<sup>13</sup>C NMR of compound **3a** (101 MHz in CDCl<sub>3</sub>)**

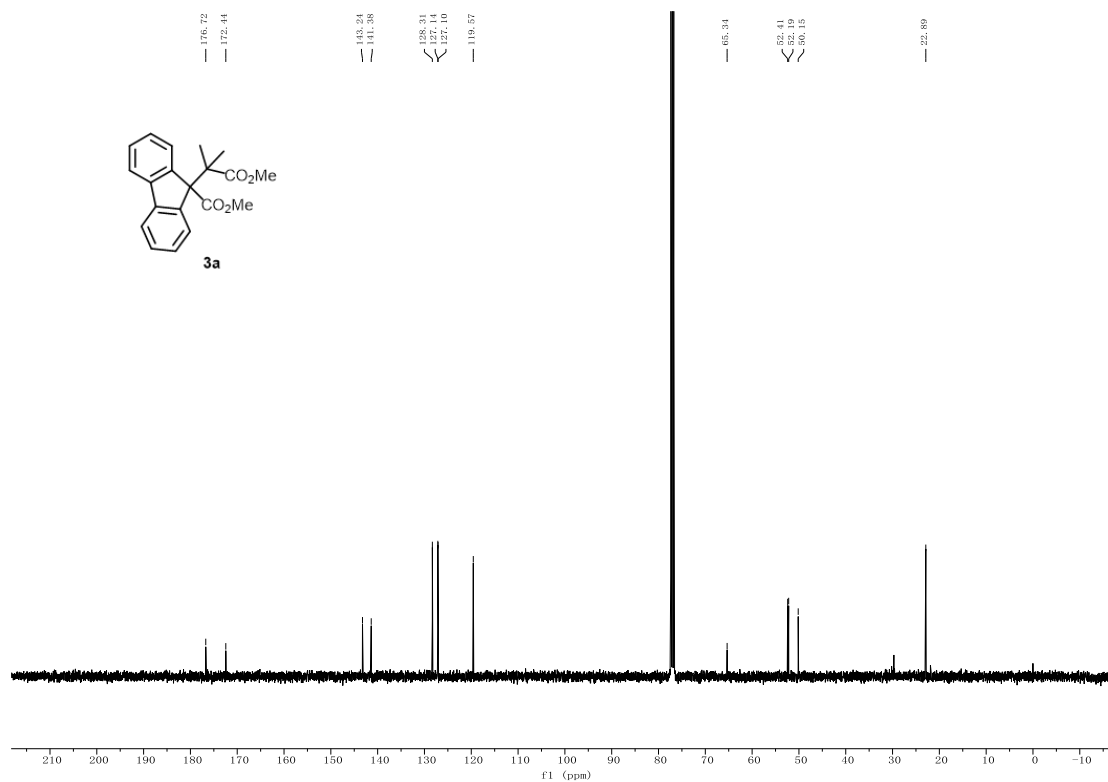

**<sup>1</sup>H NMR of compound **3b** (400 MHz in CDCl<sub>3</sub>)**

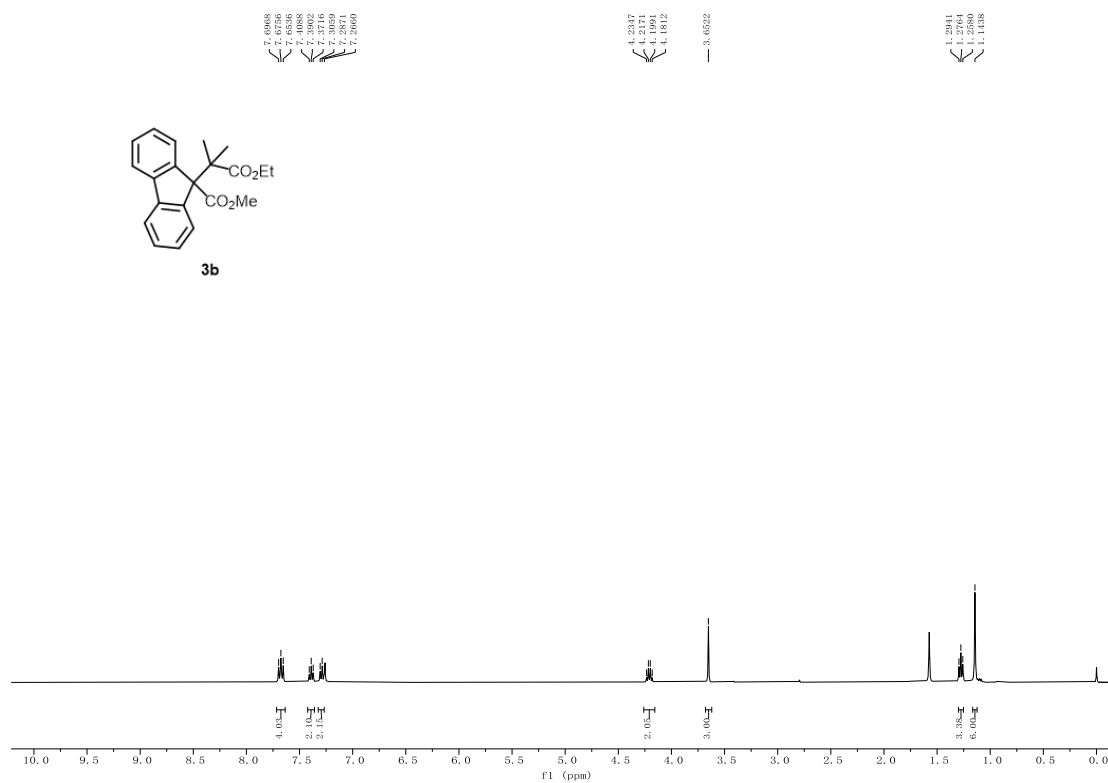

**<sup>13</sup>C NMR of compound 3b (101 MHz in CDCl<sub>3</sub>)**

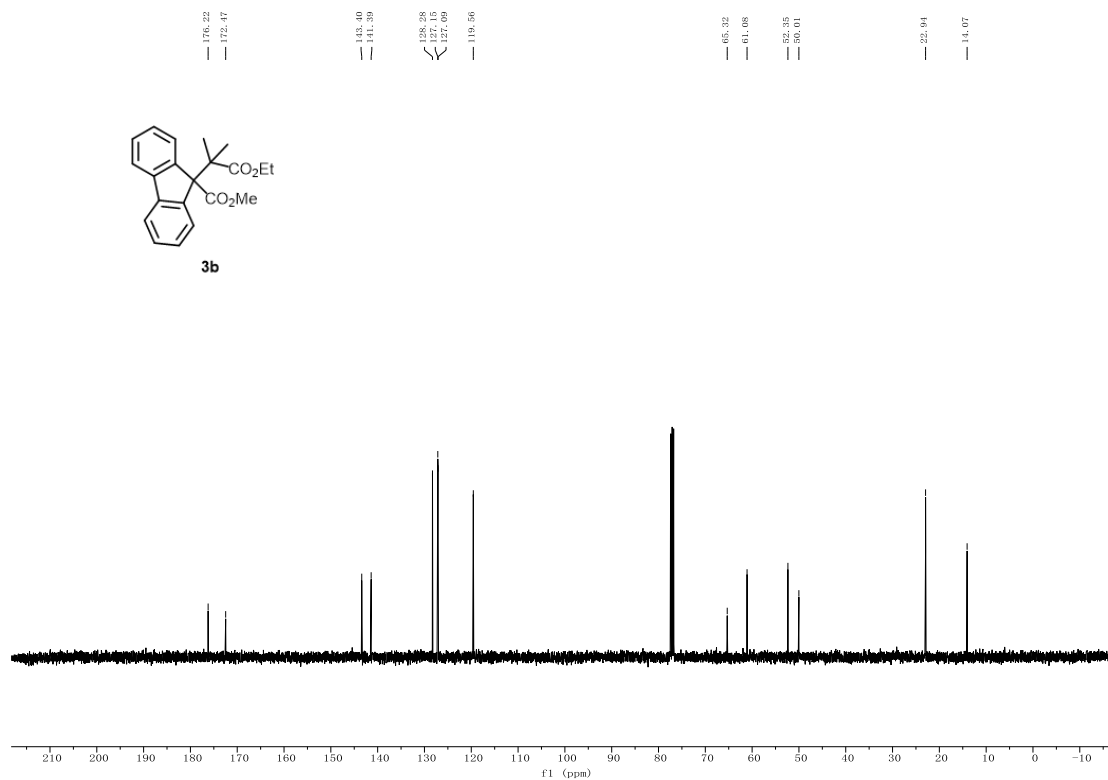

**<sup>1</sup>H NMR of compound 3c (400 MHz in CDCl<sub>3</sub>)**

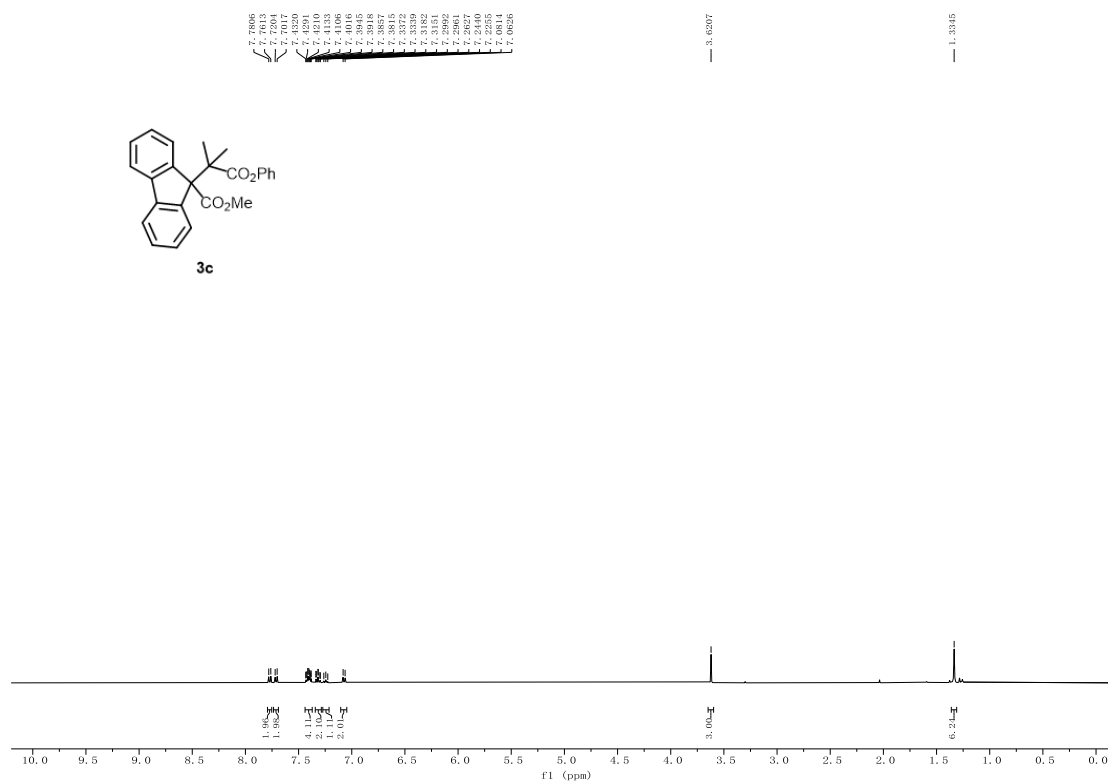

**<sup>13</sup>C NMR of compound 3c (101 MHz in CDCl<sub>3</sub>)**

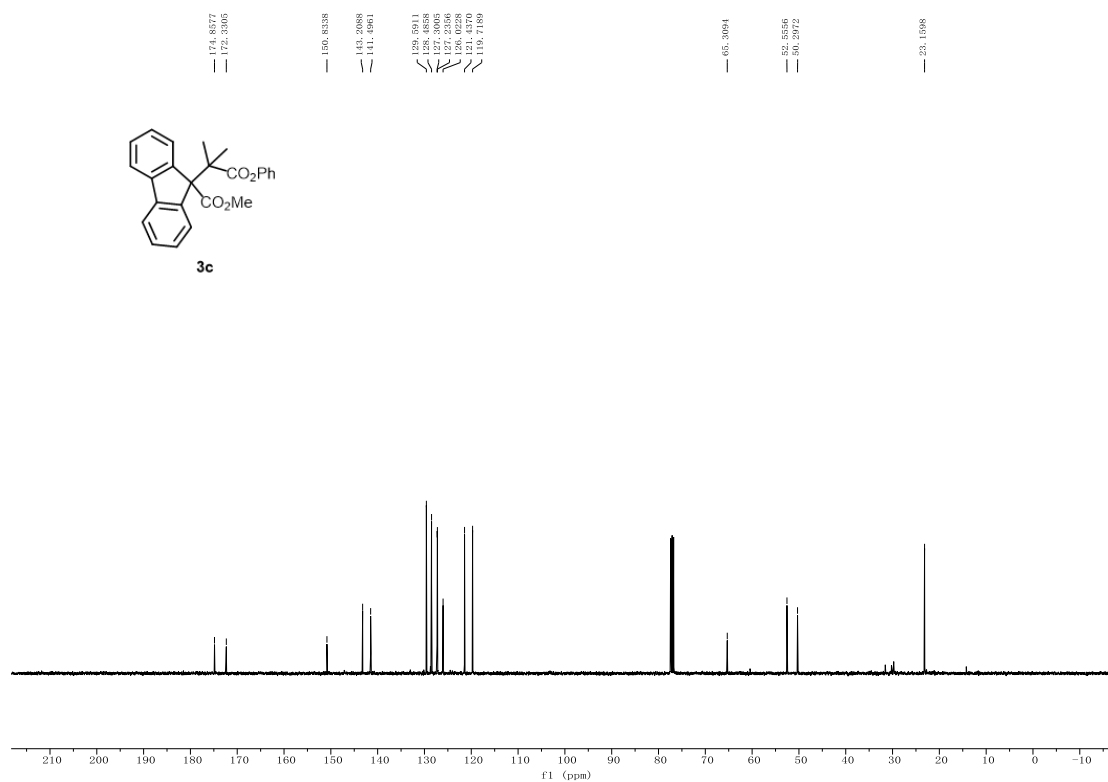

**<sup>1</sup>H NMR of compound 3d (400 MHz in CDCl<sub>3</sub>)**

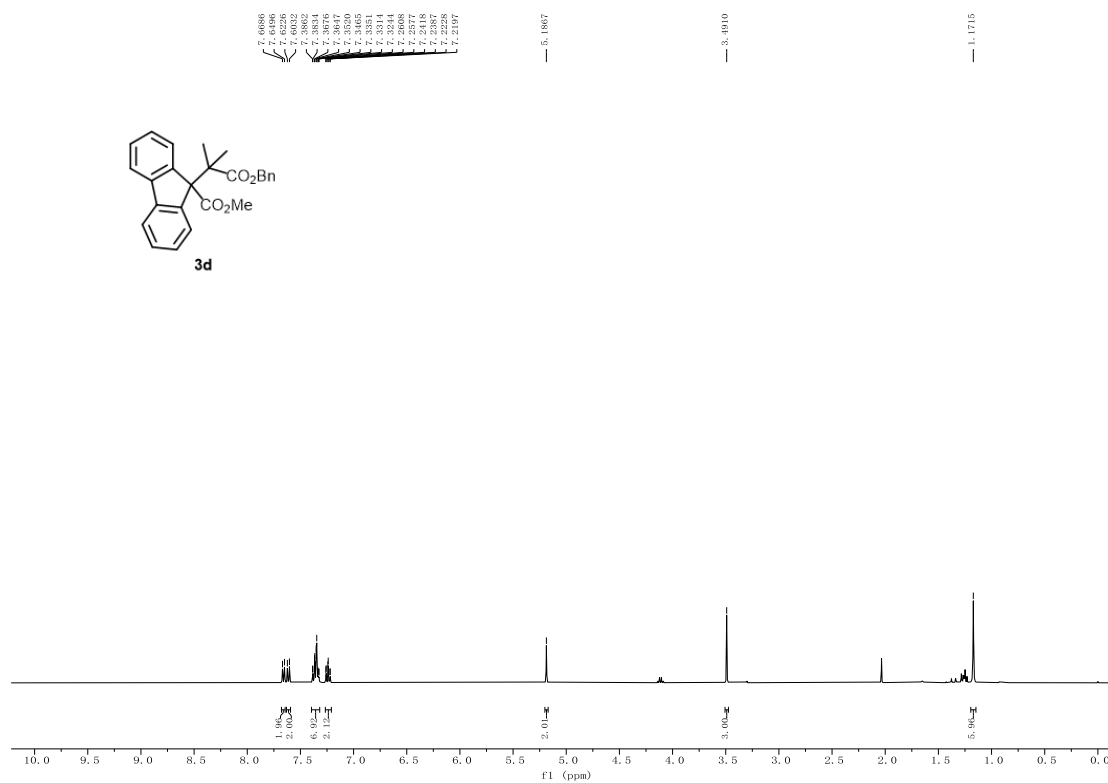

**<sup>13</sup>C NMR of compound 3d (101 MHz in CDCl<sub>3</sub>)**

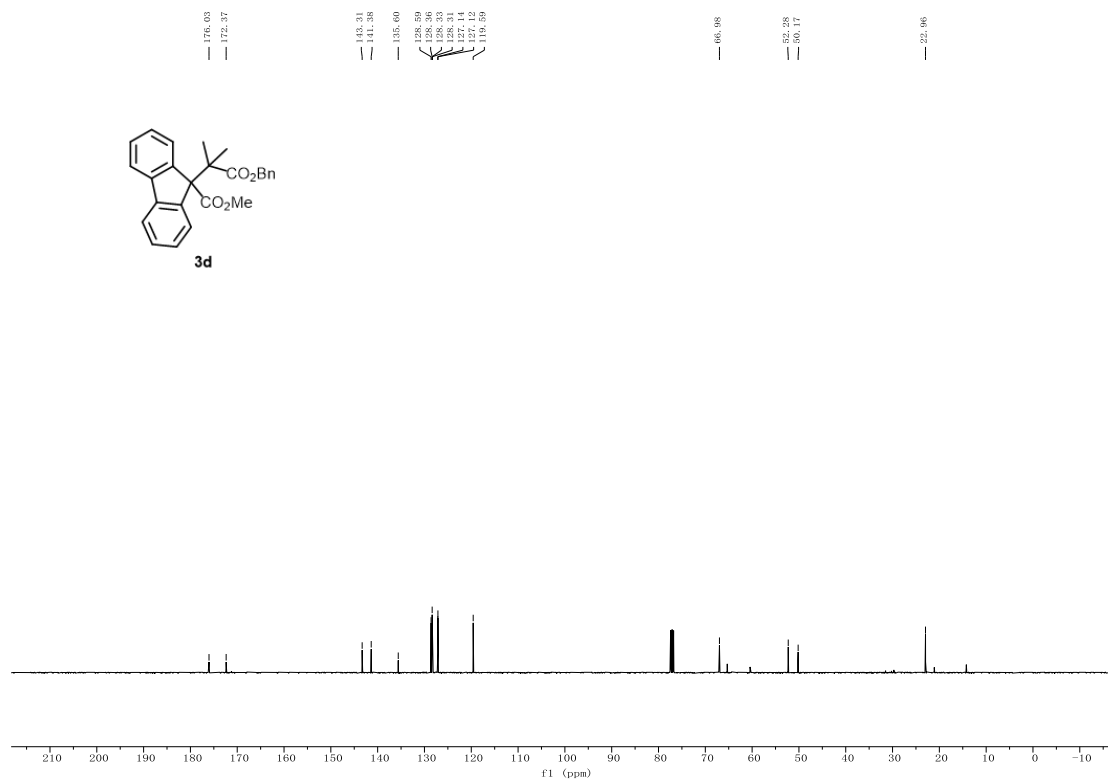

**<sup>1</sup>H NMR of compound 3e (400 MHz in CDCl<sub>3</sub>)**

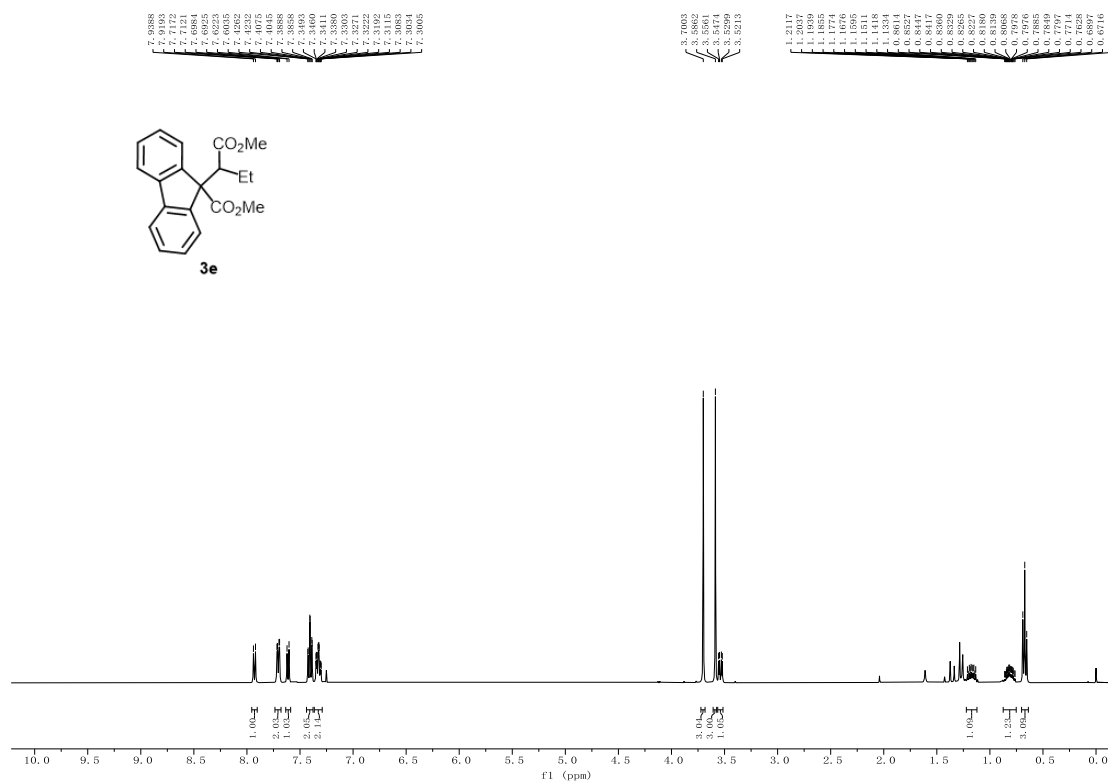

**<sup>13</sup>C NMR of compound 3e (101 MHz in CDCl<sub>3</sub>)**

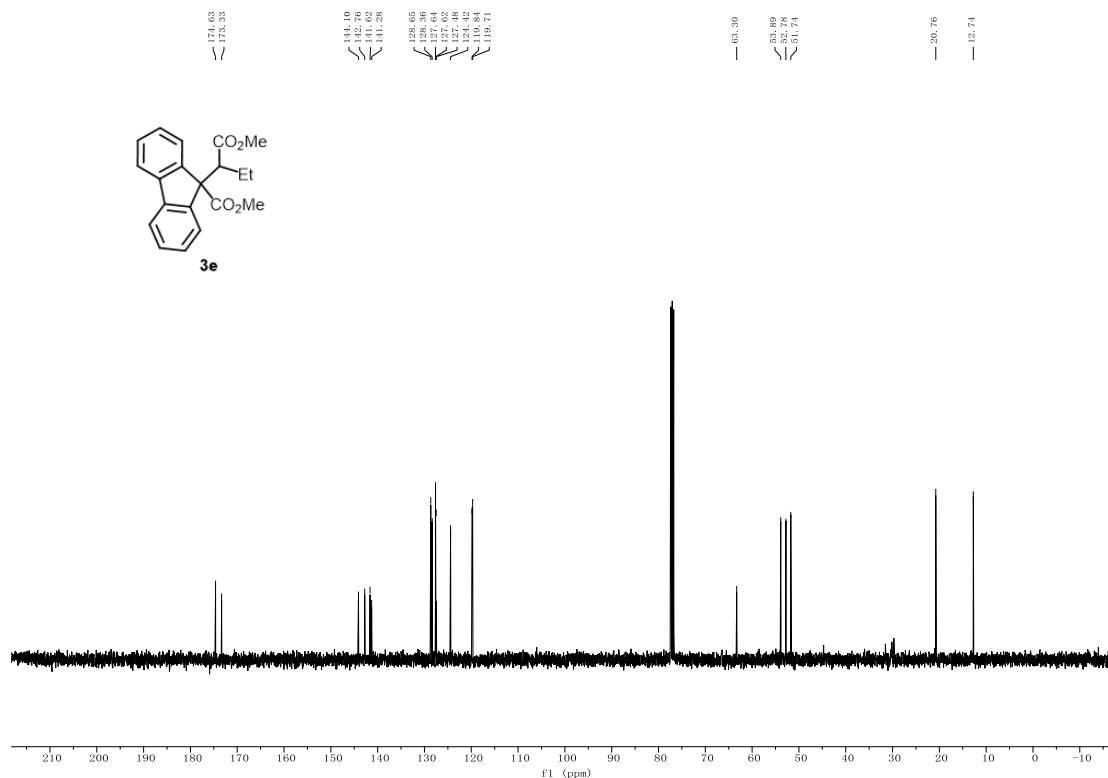

**<sup>1</sup>H NMR of compound 3f (400 MHz in CDCl<sub>3</sub>)**

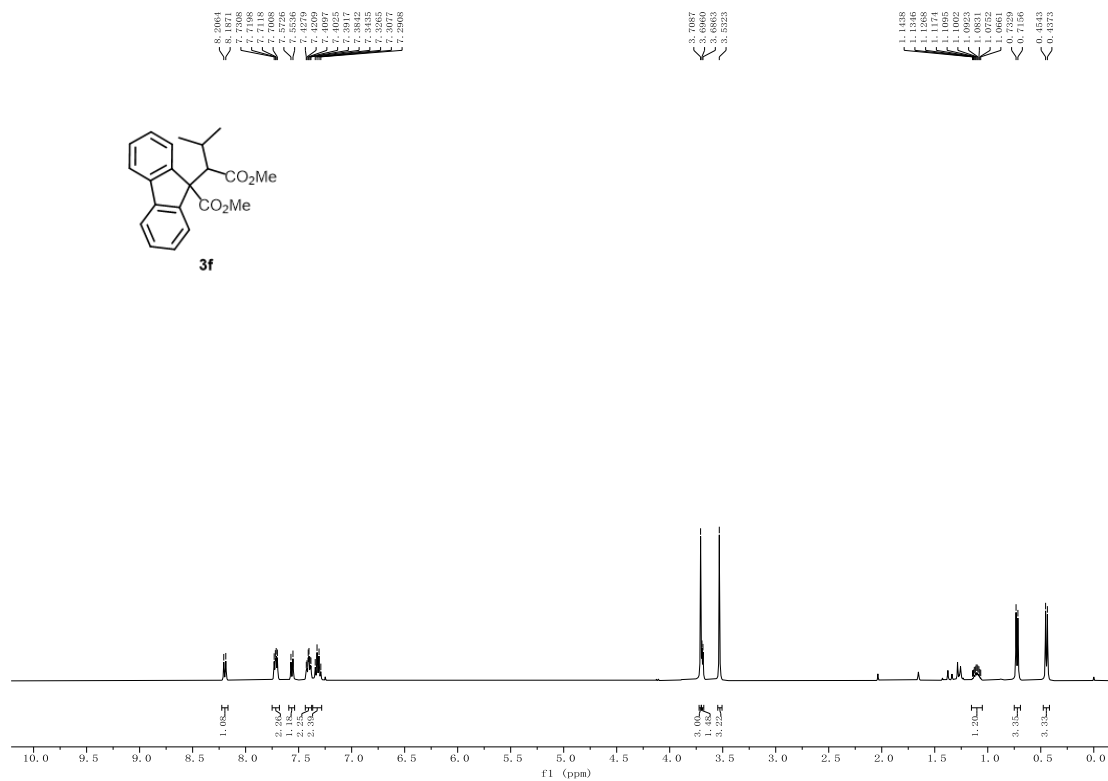

**<sup>13</sup>C NMR of compound 3f (101 MHz in CDCl<sub>3</sub>)**

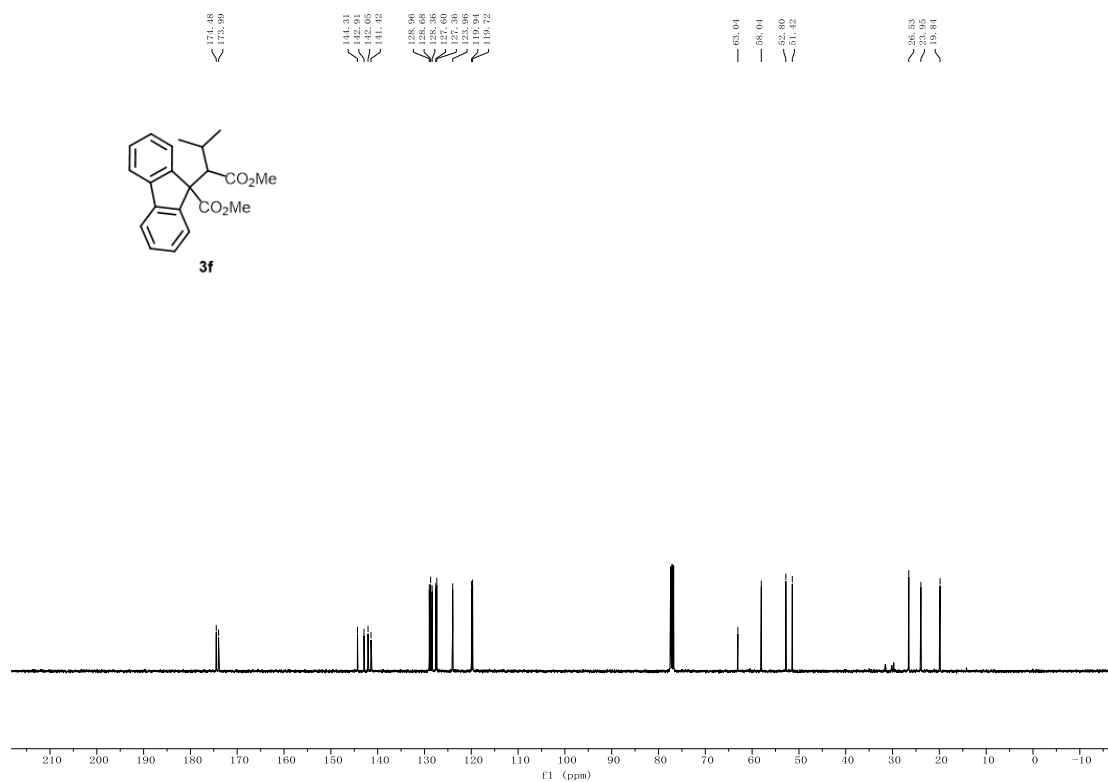

**<sup>1</sup>H NMR of compound 3g (400 MHz in CDCl<sub>3</sub>)**

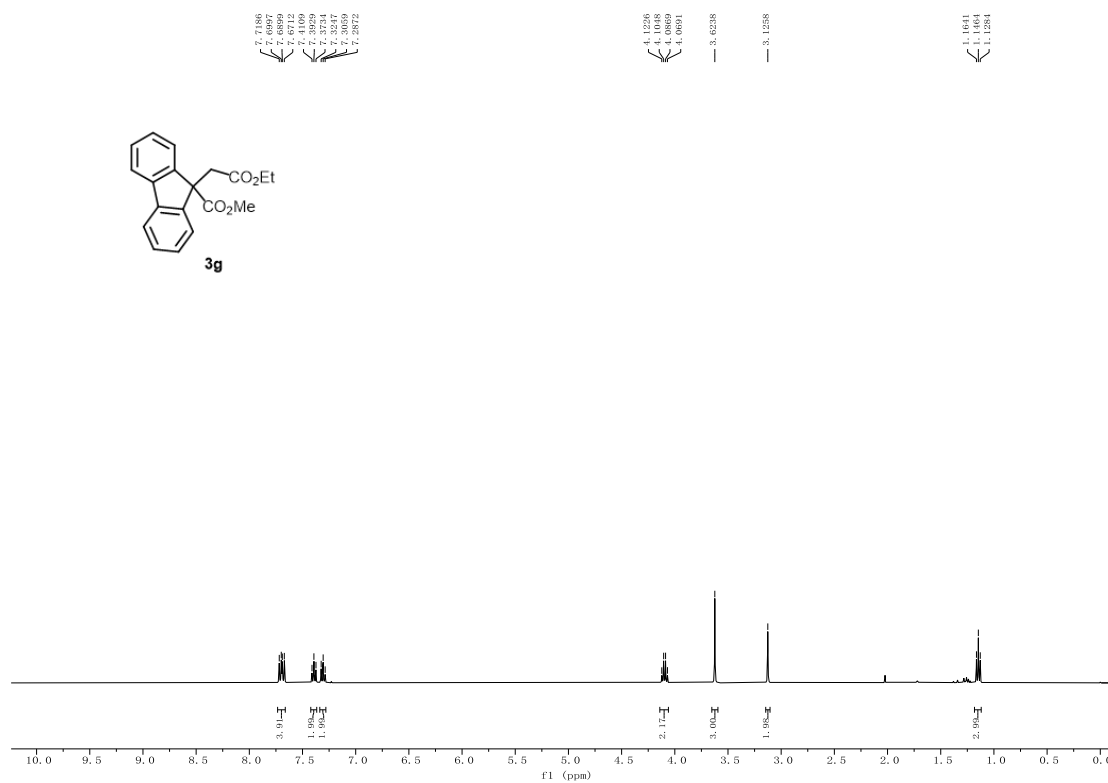

**<sup>13</sup>C NMR of compound 3g (101 MHz in CDCl<sub>3</sub>)**

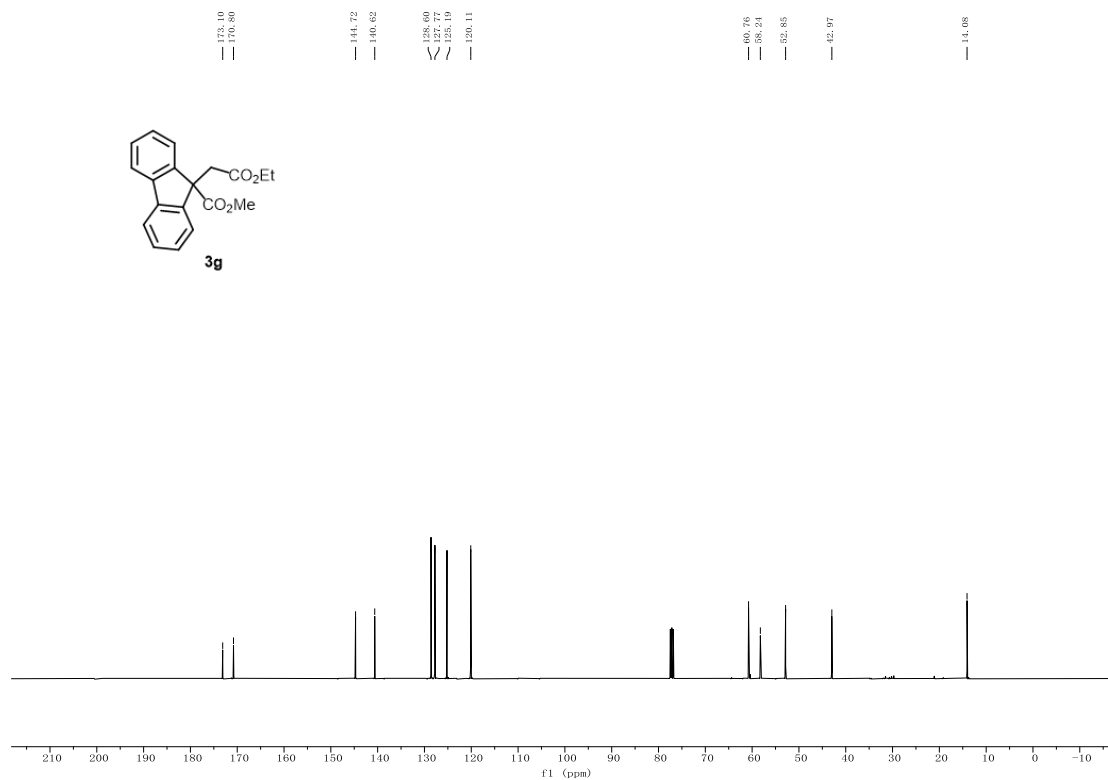

**<sup>1</sup>H NMR of compound 3h (400 MHz in CDCl<sub>3</sub>)**

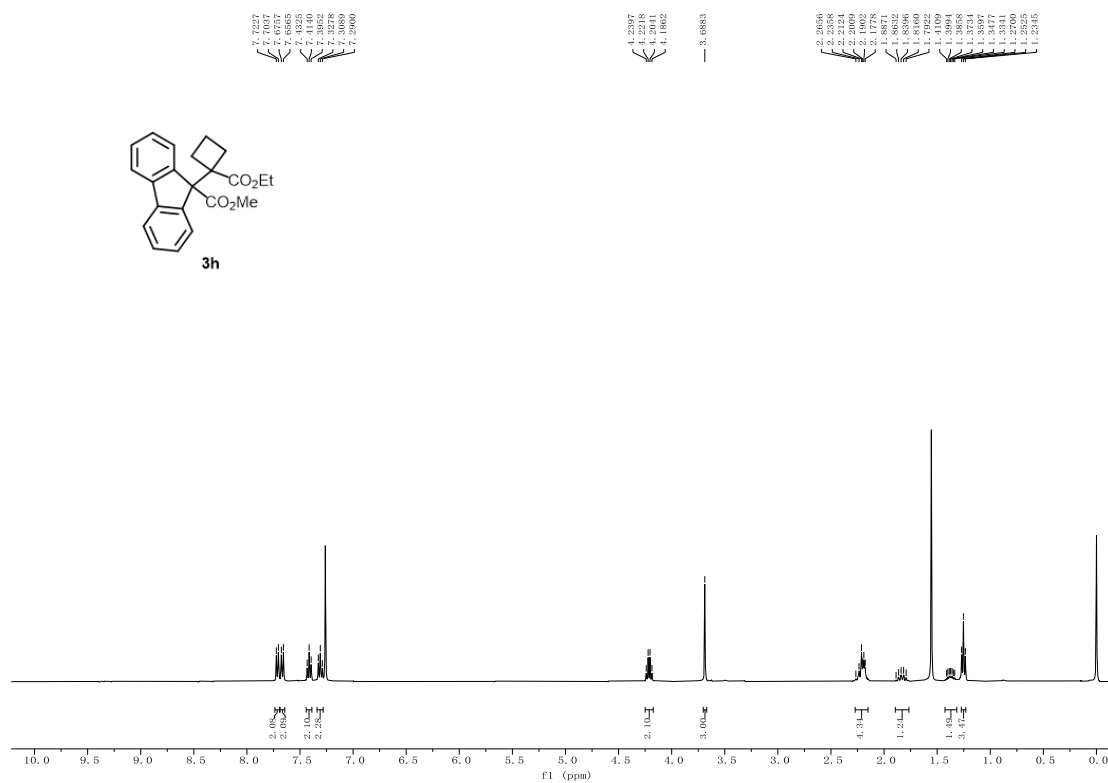

**<sup>13</sup>C NMR of compound **3h** (101 MHz in CDCl<sub>3</sub>)**

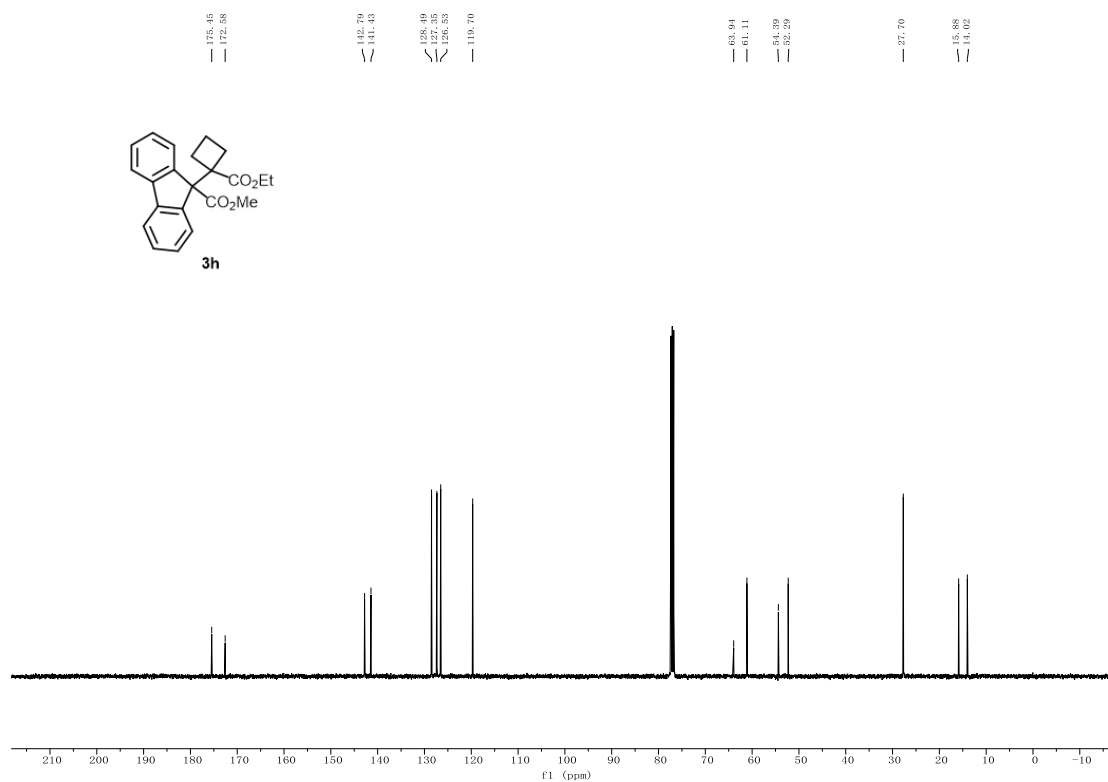

**<sup>1</sup>H NMR of compound **3i** (400 MHz in CDCl<sub>3</sub>)**

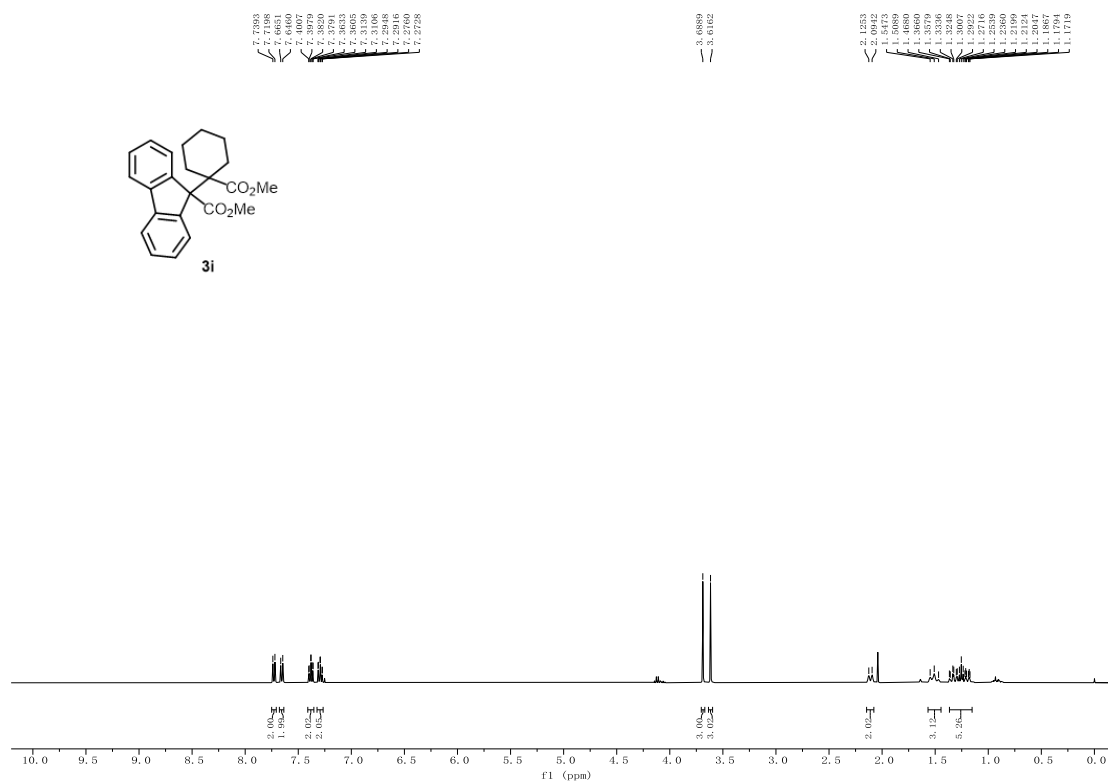

**<sup>13</sup>C NMR of compound **3i** (101 MHz in CDCl<sub>3</sub>)**

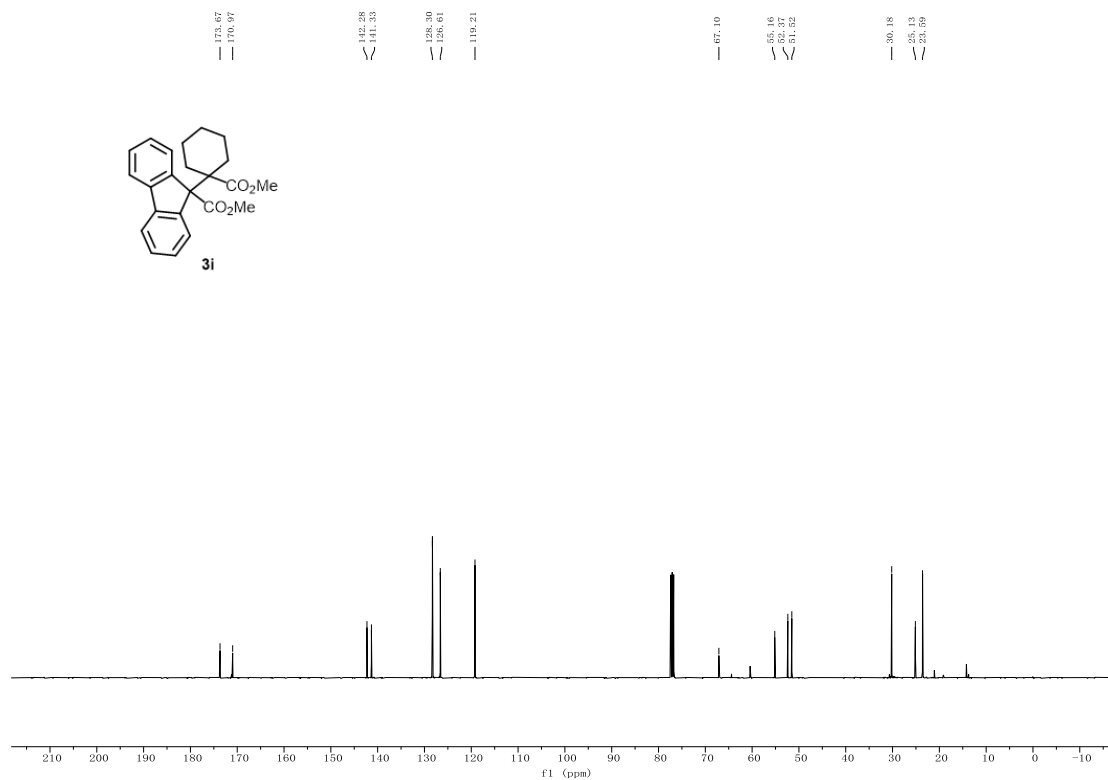

**<sup>1</sup>H NMR of compound **3j** (400 MHz in CDCl<sub>3</sub>)**

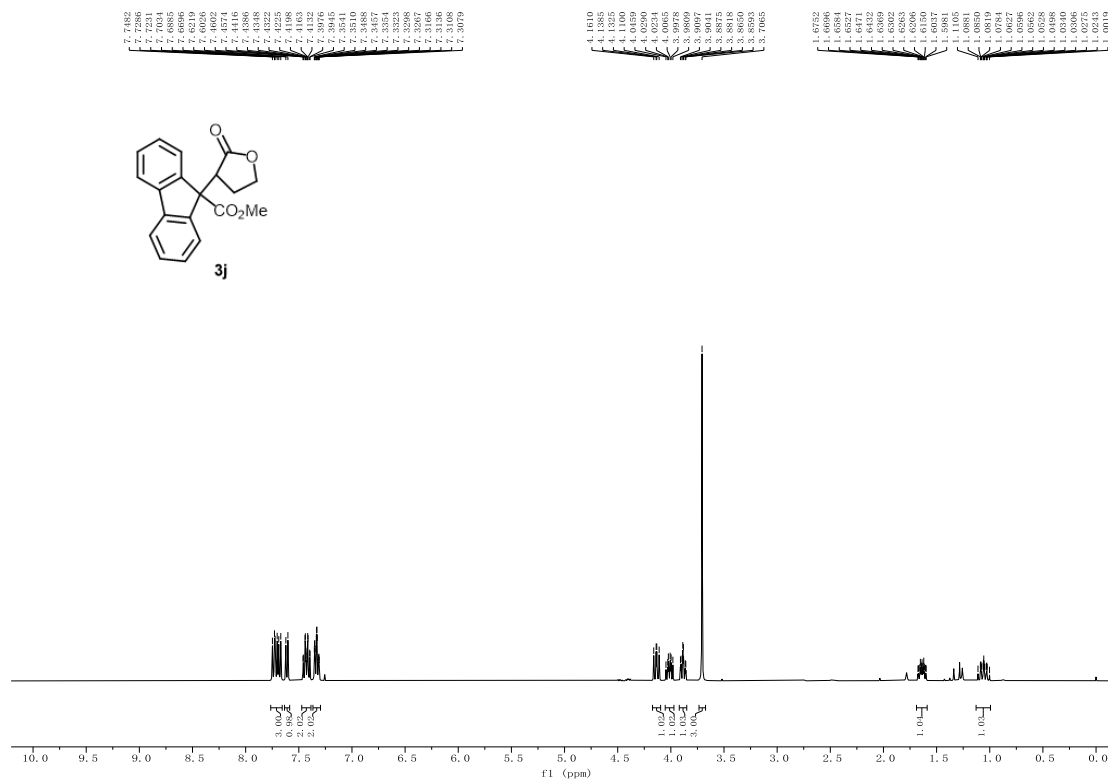

**<sup>13</sup>C NMR of compound 3j (101 MHz in CDCl<sub>3</sub>)**

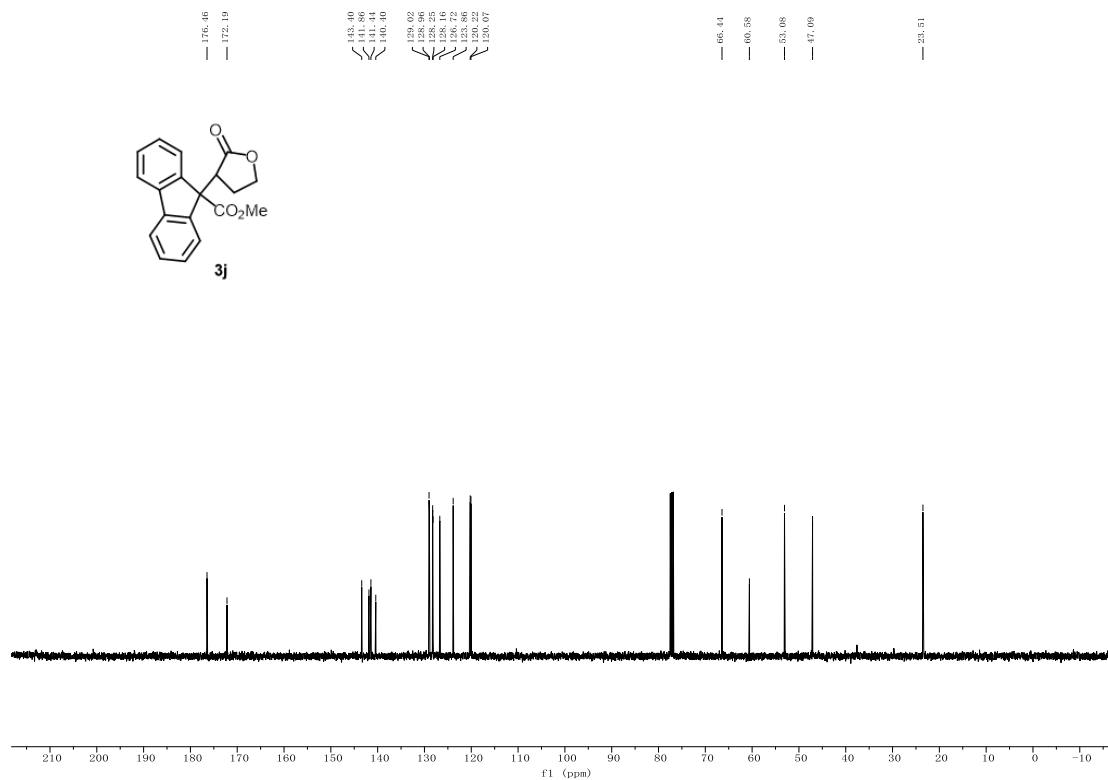

**<sup>1</sup>H NMR of compound 3k (400 MHz in CDCl<sub>3</sub>)**

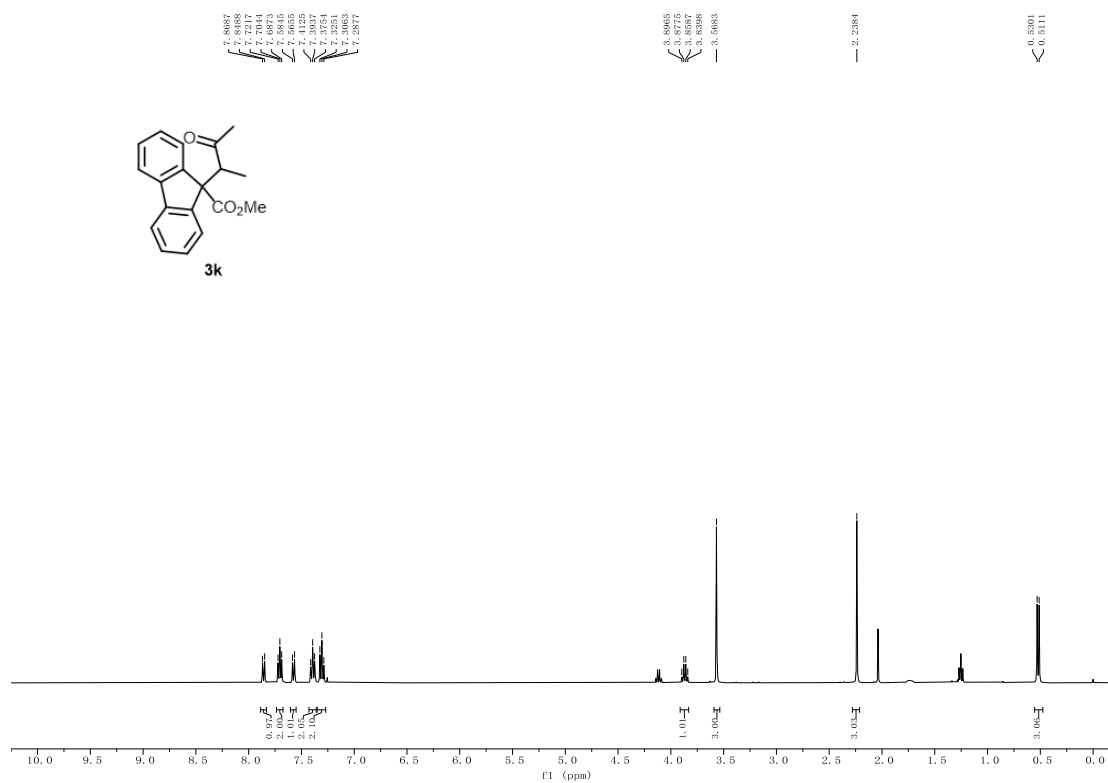

**$^{13}\text{C}$  NMR of compound **3k** (101 MHz in  $\text{CDCl}_3$ )**

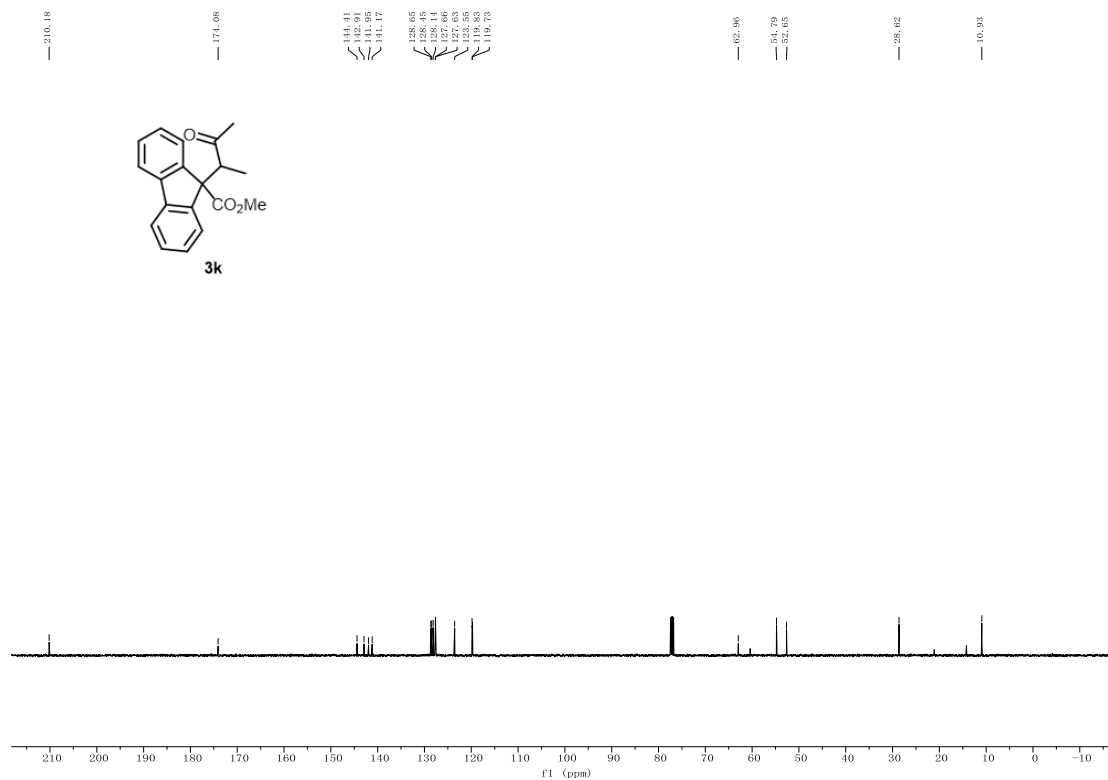

**$^1\text{H}$  NMR of compound **3l** (400 MHz in  $\text{CDCl}_3$ )**

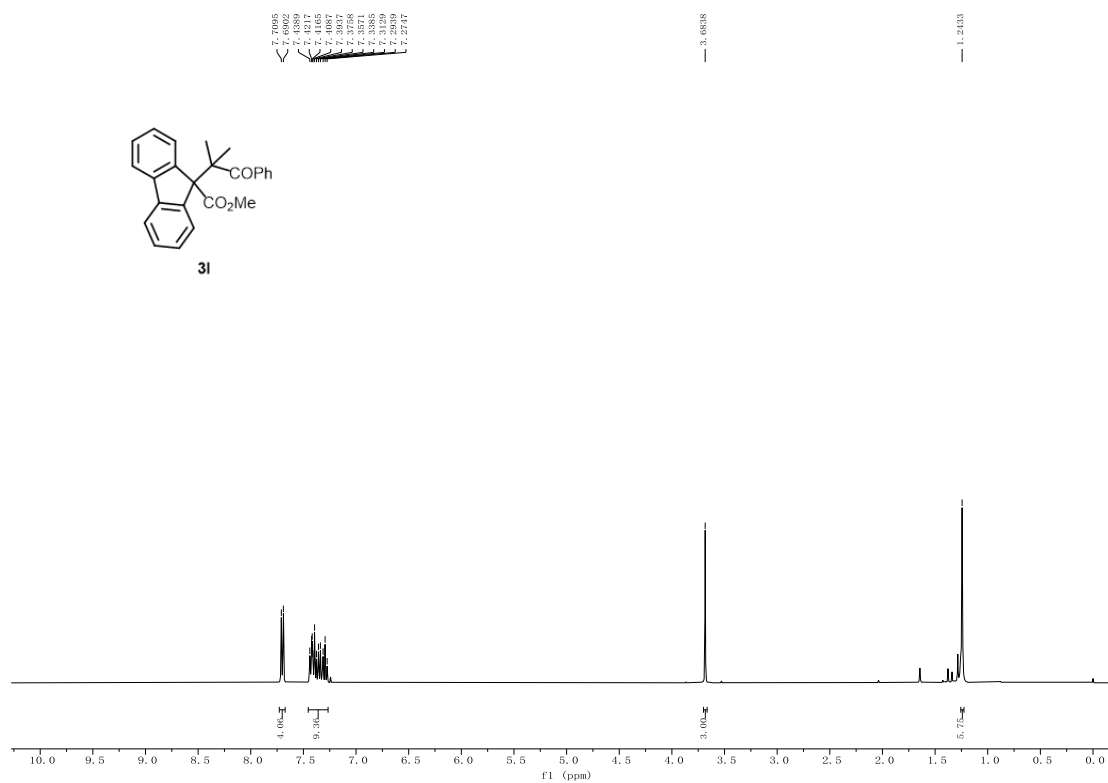

**<sup>13</sup>C NMR of compound 3l (101 MHz in CDCl<sub>3</sub>)**

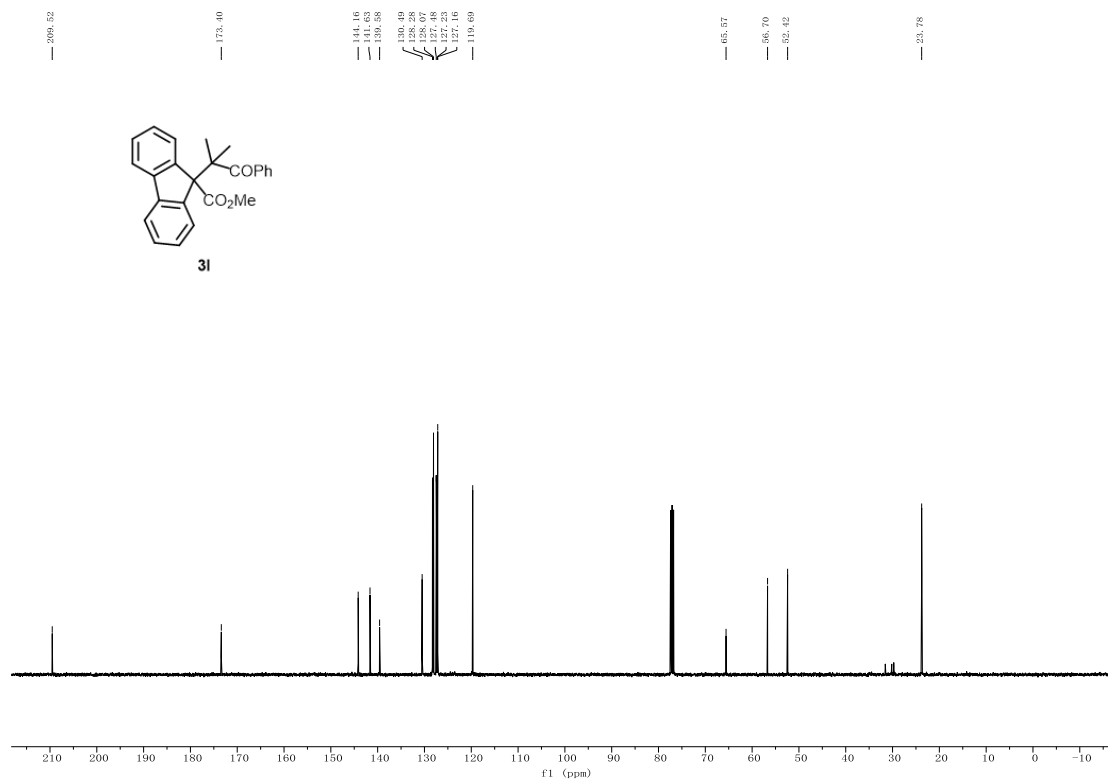

**<sup>1</sup>H NMR of compound 3m (400 MHz in CDCl<sub>3</sub>)**

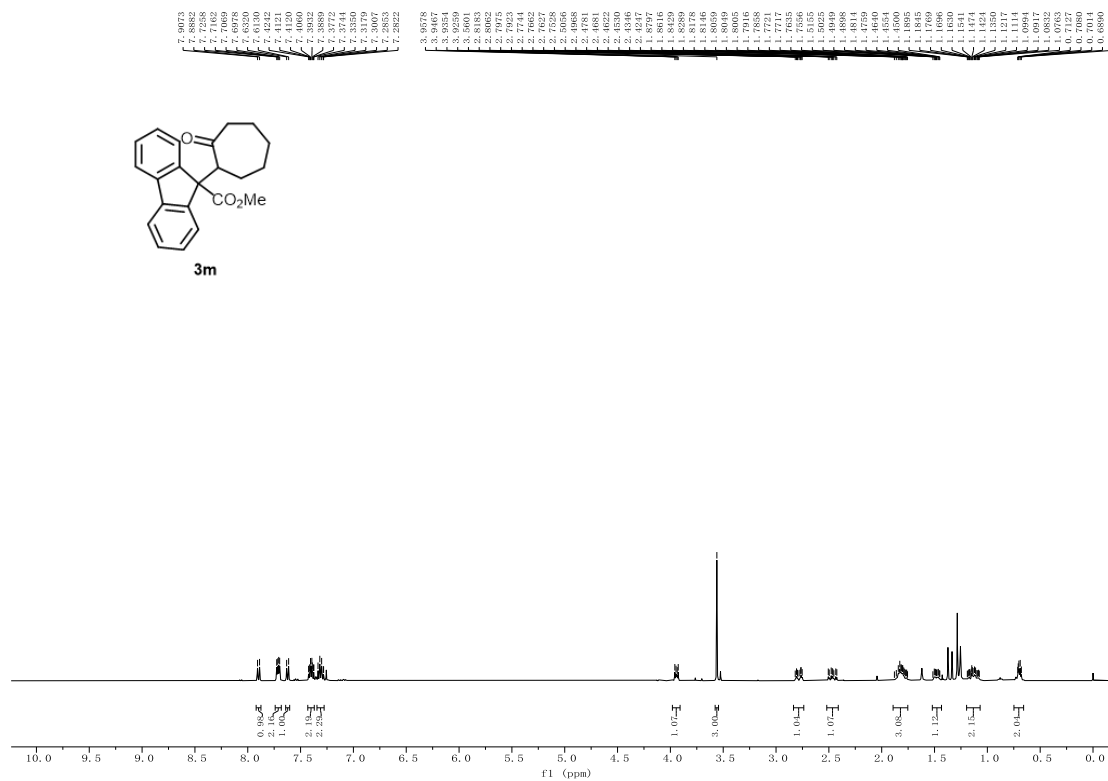

**$^{13}\text{C}$  NMR of compound **3m** (101 MHz in  $\text{CDCl}_3$ )**

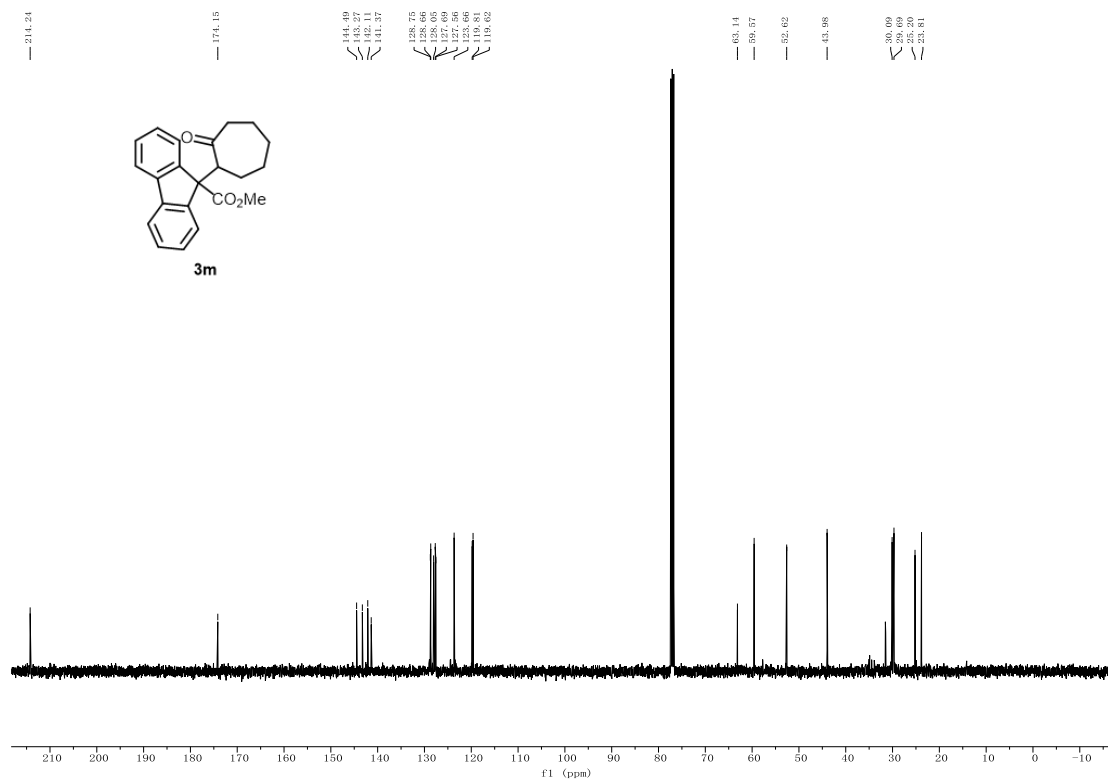

**$^1\text{H}$  NMR of compound **3n** (400 MHz in  $\text{CDCl}_3$ )**

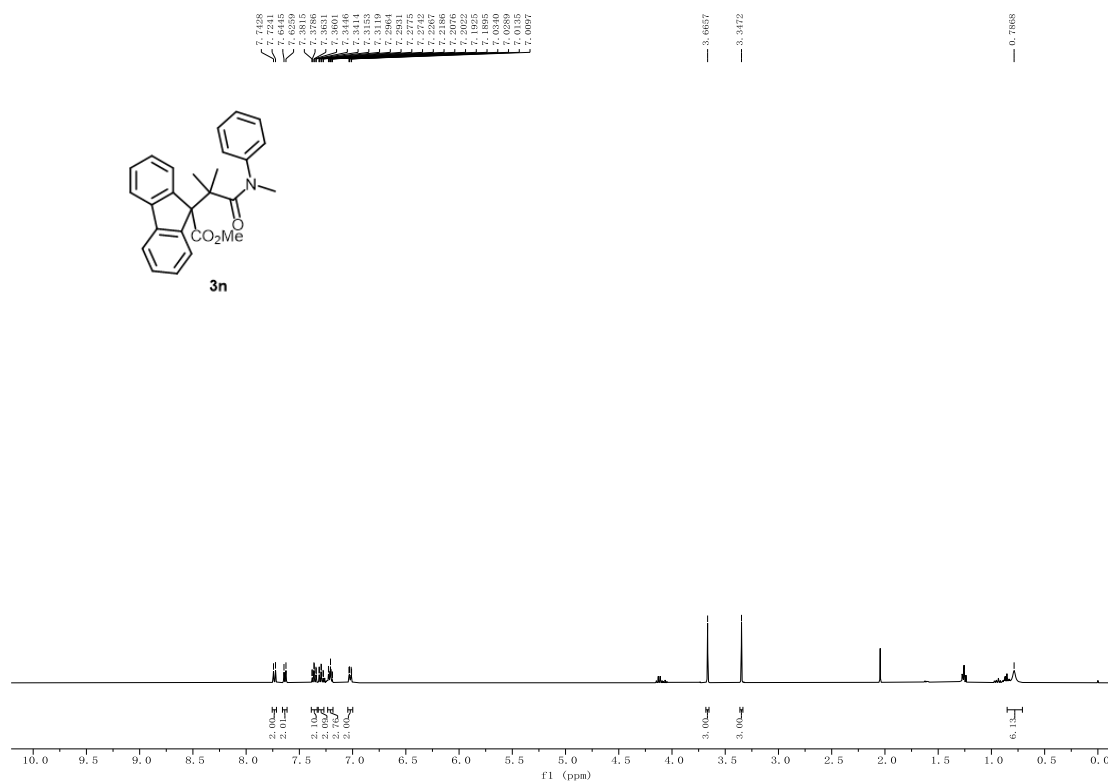

**$^{13}\text{C}$  NMR of compound **3n** (101 MHz in  $\text{CDCl}_3$ )**

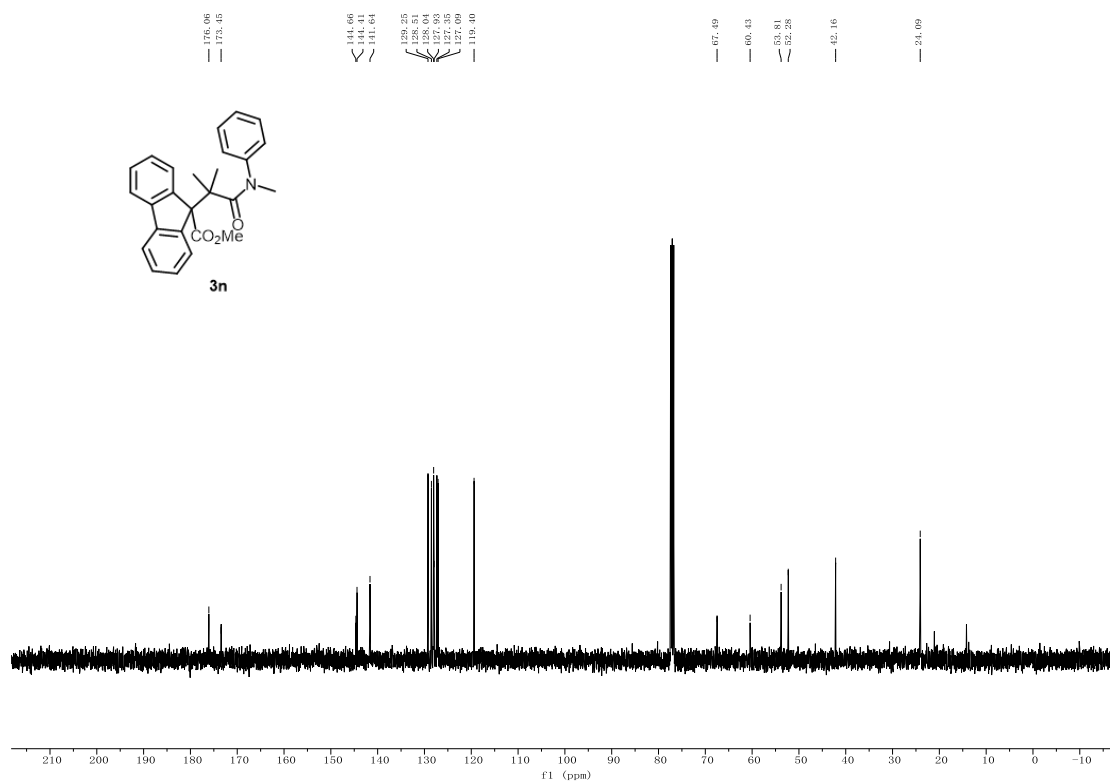

**$^1\text{H}$  NMR of compound **3o** (400 MHz in  $\text{CDCl}_3$ )**

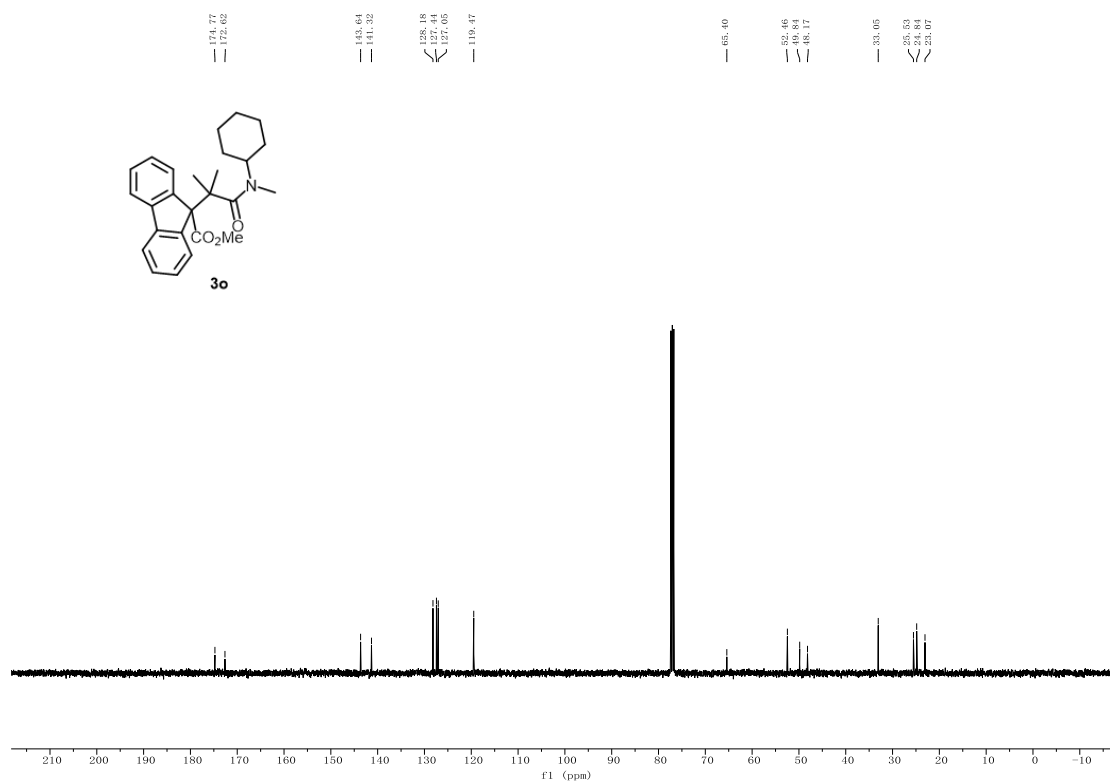

**3o**

Chemical structure of **3o** is shown above the spectrum. The spectrum displays peaks corresponding to the chemical shifts listed on the right:

- 174.7652
- 174.5655
- 143.4827
- 141.5168
- 128.1826
- 127.4672
- 127.4092
- 119.4729
- 65.4028
- 59.4532
- 48.8586
- 48.1659
- 35.0514
- 25.5290
- 24.8426
- 23.0659

**3p**

Chemical structure of **3p** is shown above the spectrum. The structure is a fluorene derivative with a methyl ester group and a benzamide group.

<sup>1</sup>H NMR spectrum (CDCl<sub>3</sub>) of compound **3p**. The x-axis represents the chemical shift in ppm, ranging from 0.0 to 10.0. The spectrum shows several peaks, with integration values indicated below the baseline. A list of peak chemical shifts is provided on the right side of the spectrum.

Chemical structure of **3p** is shown above the spectrum.

Peak list (ppm): 7.7986, 7.7796, 7.7372, 7.7372, 7.6573, 7.6583, 7.6583, 7.6209, 7.6209, 7.4729, 7.4729, 7.4432, 7.4432, 7.4444, 7.4444, 7.4311, 7.4311, 7.4216, 7.4216, 7.4157, 7.4157, 7.4055, 7.4055, 7.4028, 7.4028, 7.3855, 7.3855, 7.3655, 7.3655, 7.3469, 7.3469, 7.3299, 7.3299, 7.3128, 7.3128, 7.3124, 7.3124, 7.3143, 7.3143, 7.0957, 7.0957, 3.5951, 0.7013, 0.6835.

**<sup>13</sup>C NMR of compound 3p (101 MHz in CDCl<sub>3</sub>)**

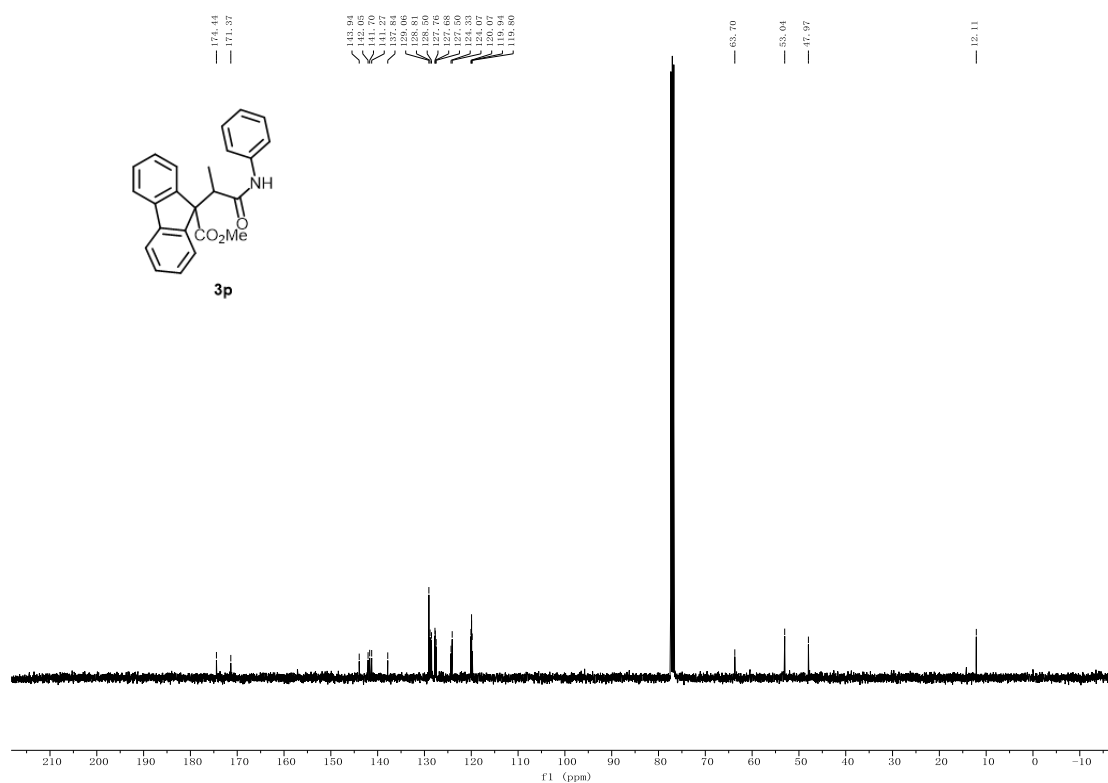

**<sup>1</sup>H NMR of compound 3q (400 MHz in CDCl<sub>3</sub>)**

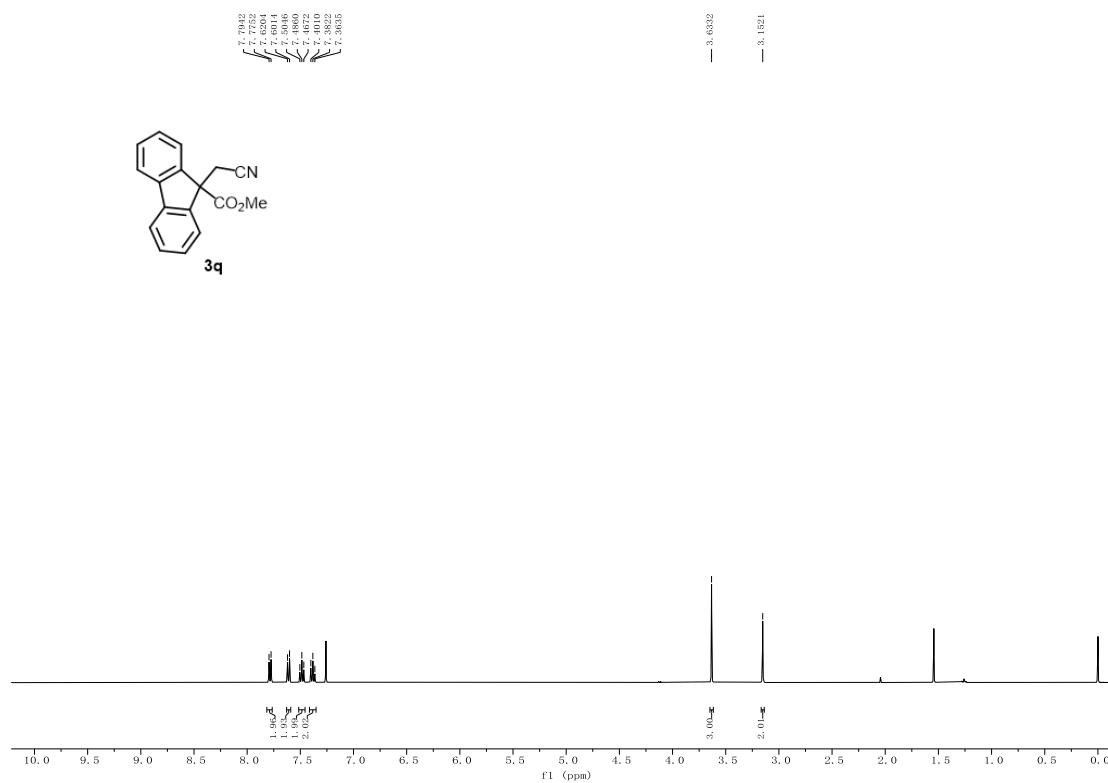

**<sup>13</sup>C NMR of compound **3q** (101 MHz in CDCl<sub>3</sub>)**

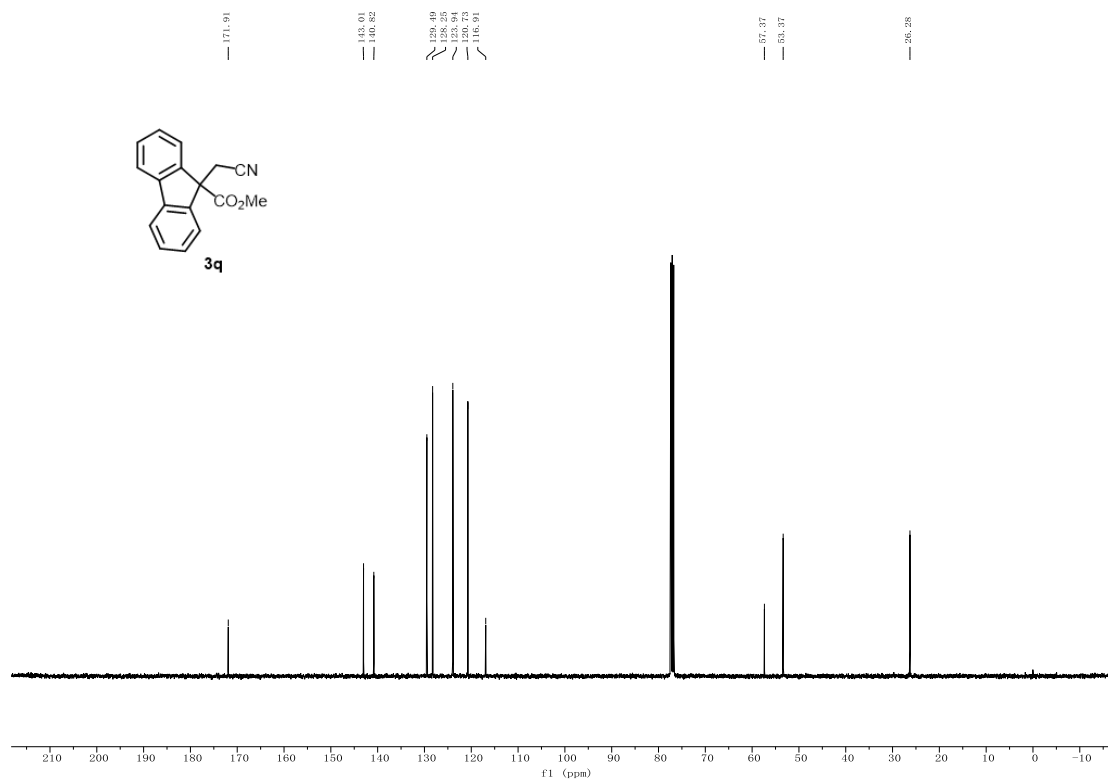

**<sup>1</sup>H NMR of compound **3r** (400 MHz in CDCl<sub>3</sub>)**

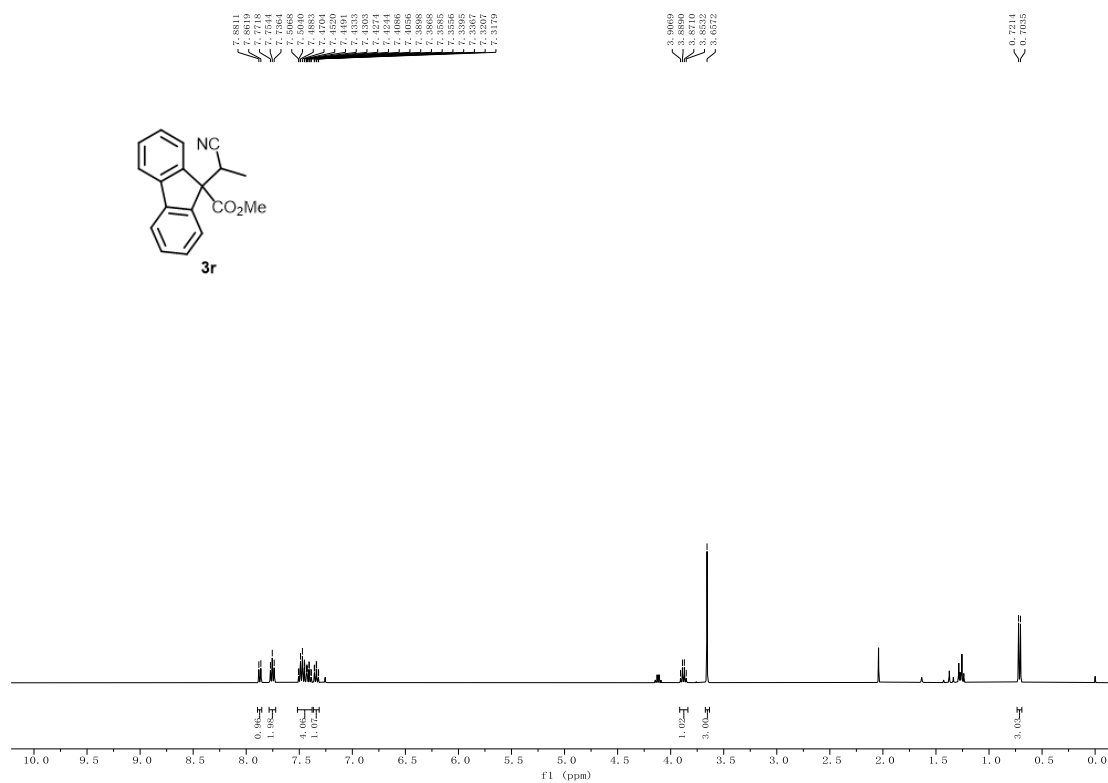

**<sup>13</sup>C NMR of compound 3r (101 MHz in CDCl<sub>3</sub>)**

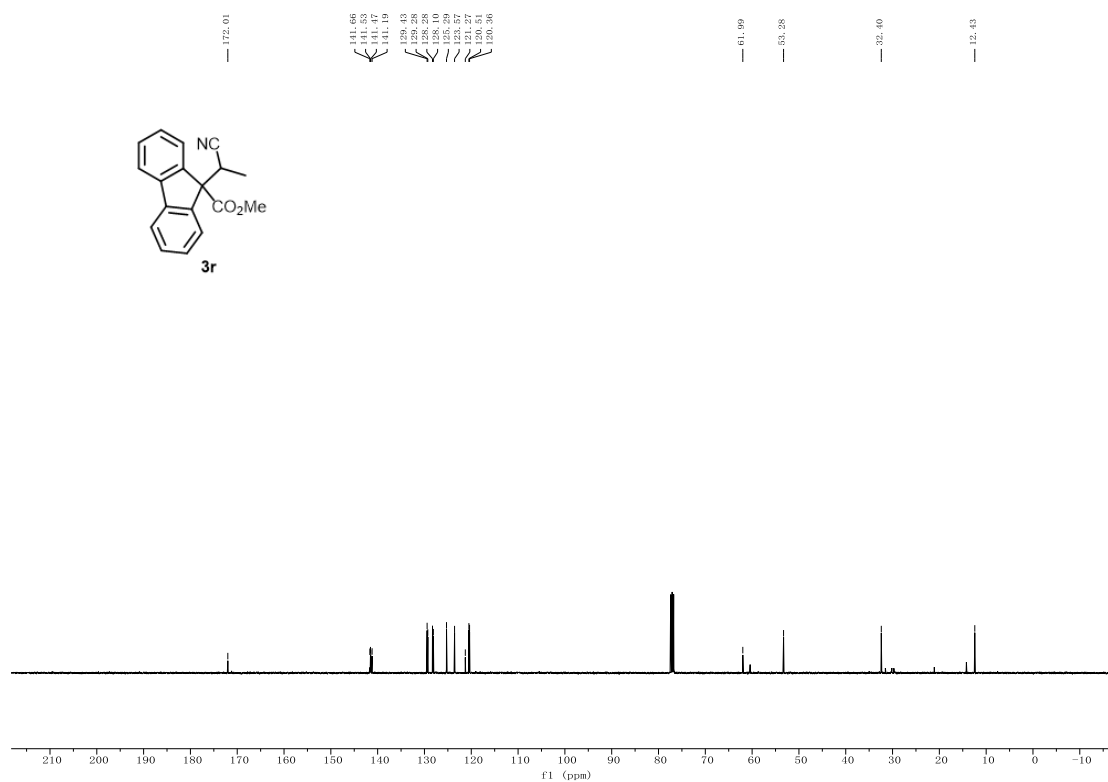

**<sup>1</sup>H NMR of compound 3s (400 MHz in CDCl<sub>3</sub>)**

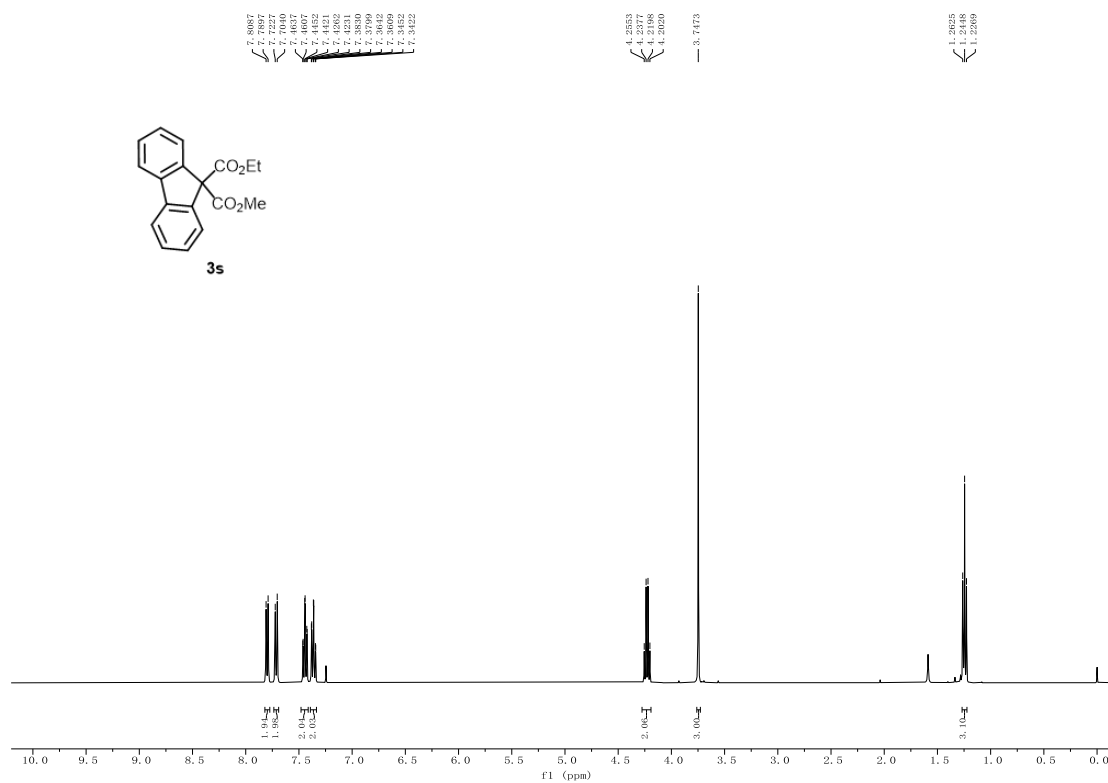

**3s**

Chemical structure of **3s** is shown above the spectrum. The spectrum displays peaks at 168.23, 168.44, 141.31, 140.06, 129.19, 128.62, 128.77, 126.07, 68.29, 62.36, 53.34, and 13.97 ppm.

[illegible]

**<sup>13</sup>C NMR of compound 3t (101 MHz in CDCl<sub>3</sub>)**

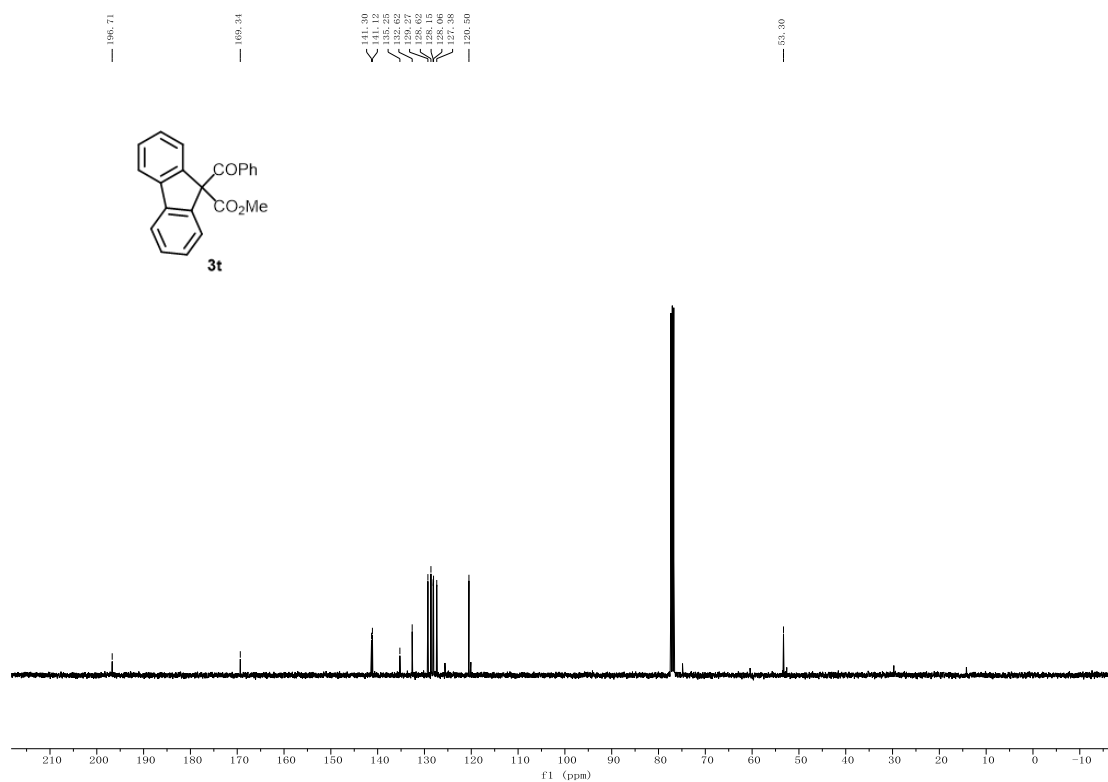

**<sup>1</sup>H NMR of compound 3u (400 MHz in CDCl<sub>3</sub>)**

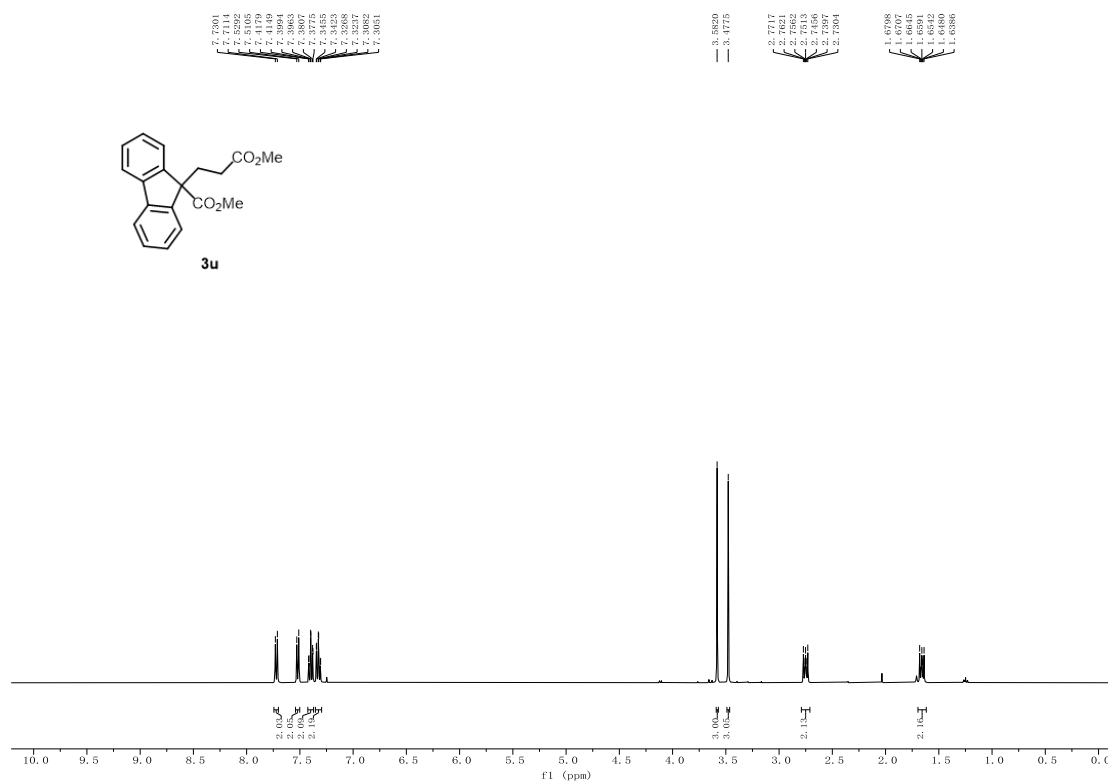

**<sup>13</sup>C NMR of compound 3u (101 MHz in CDCl<sub>3</sub>)**

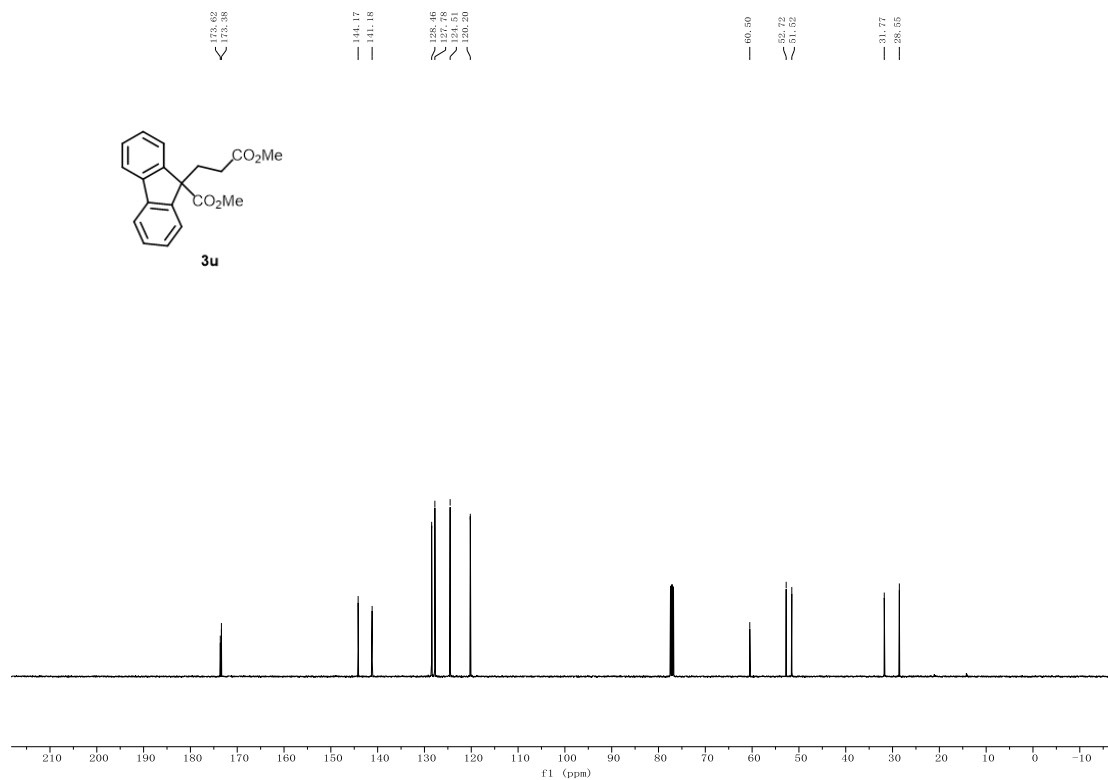

**<sup>1</sup>H NMR of compound 4a (400 MHz in CDCl<sub>3</sub>)**

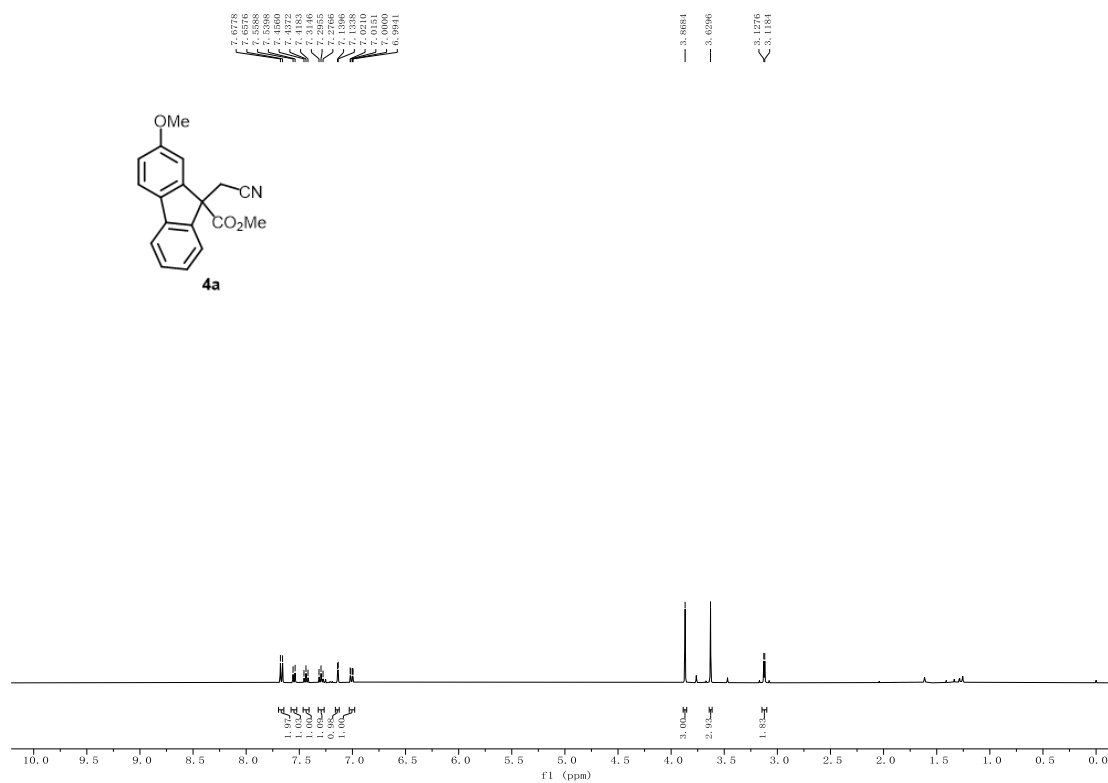

**<sup>13</sup>C NMR of compound 4a (101 MHz in CDCl<sub>3</sub>)**

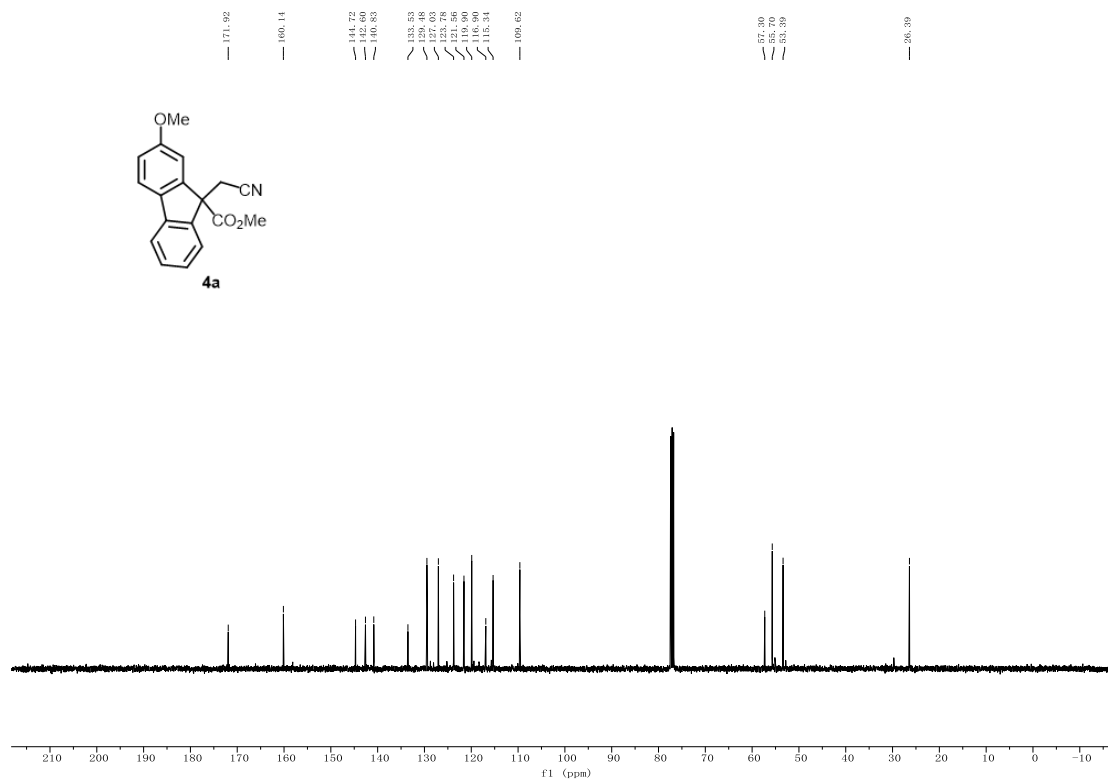

**<sup>1</sup>H NMR of compound 4b (400 MHz in CDCl<sub>3</sub>)**

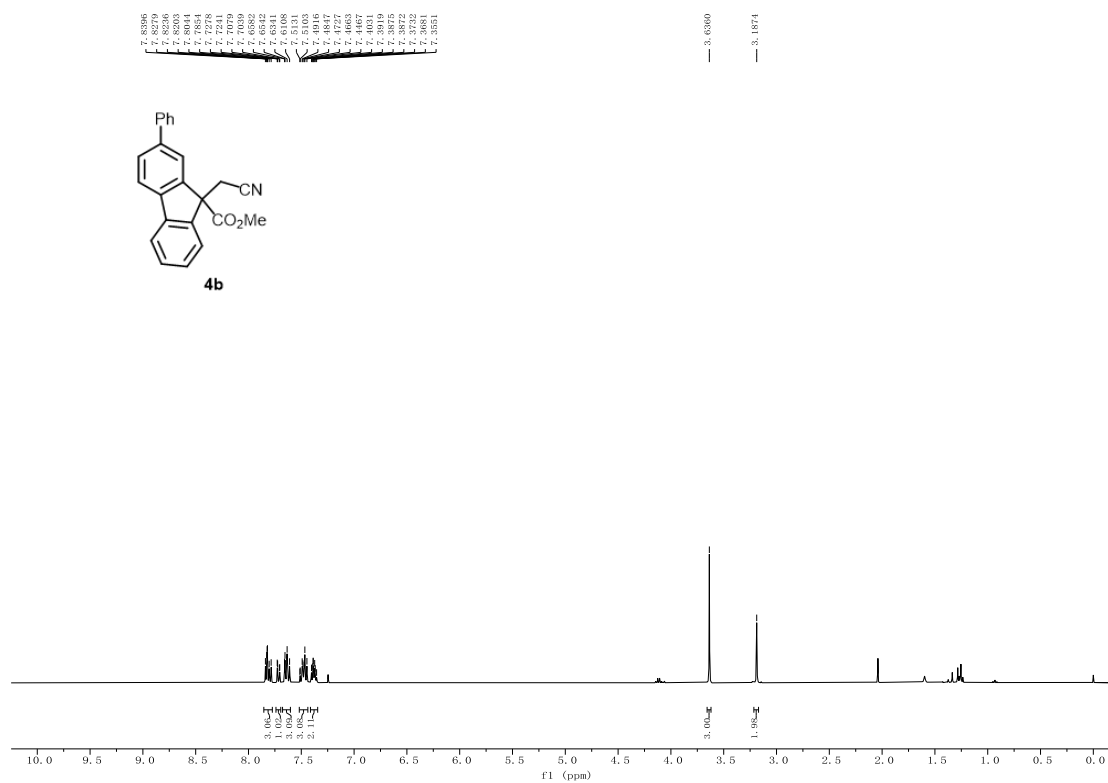

**$^{13}\text{C}$  NMR of compound **4b** (101 MHz in  $\text{CDCl}_3$ )**

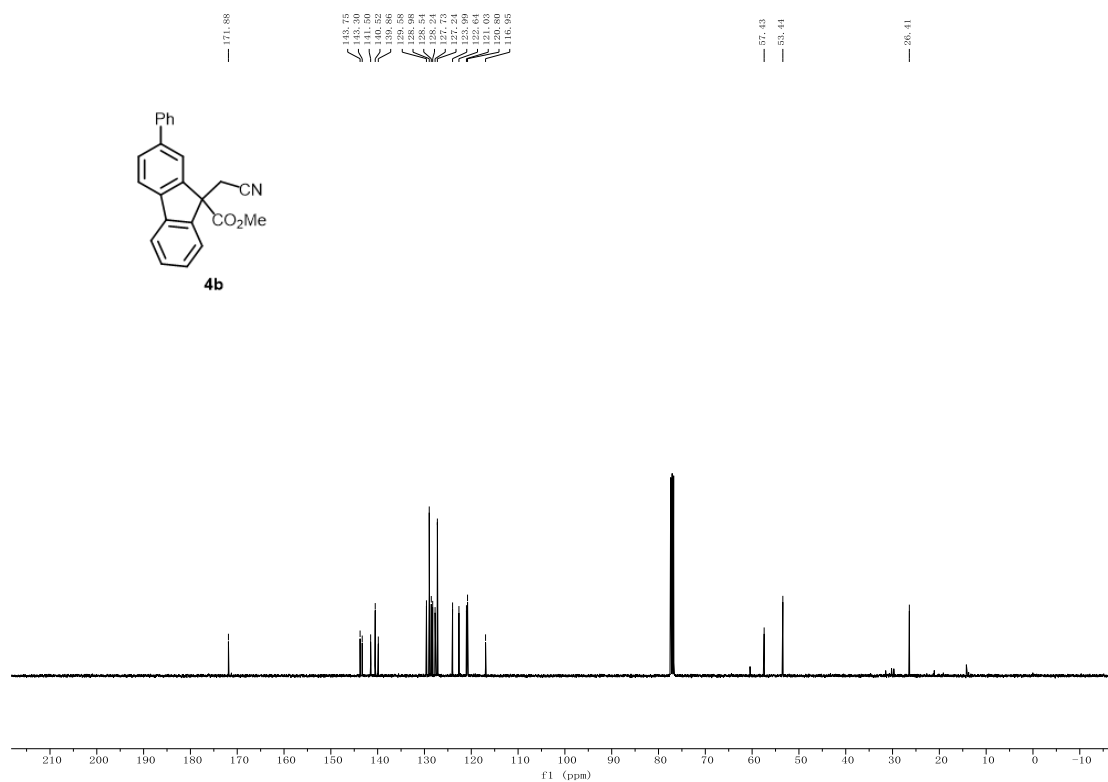

**$^1\text{H}$  NMR of compound **4c** (400 MHz in  $\text{CDCl}_3$ )**

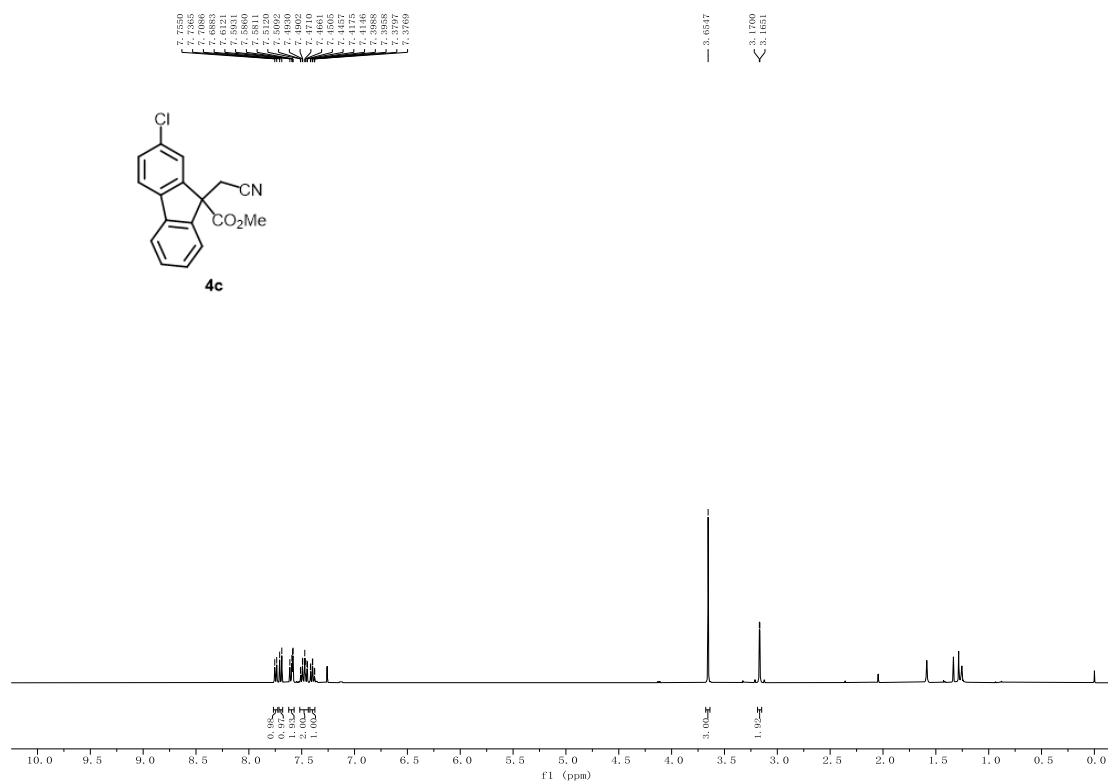

**$^{13}\text{C}$  NMR of compound **4c** (101 MHz in  $\text{CDCl}_3$ )**

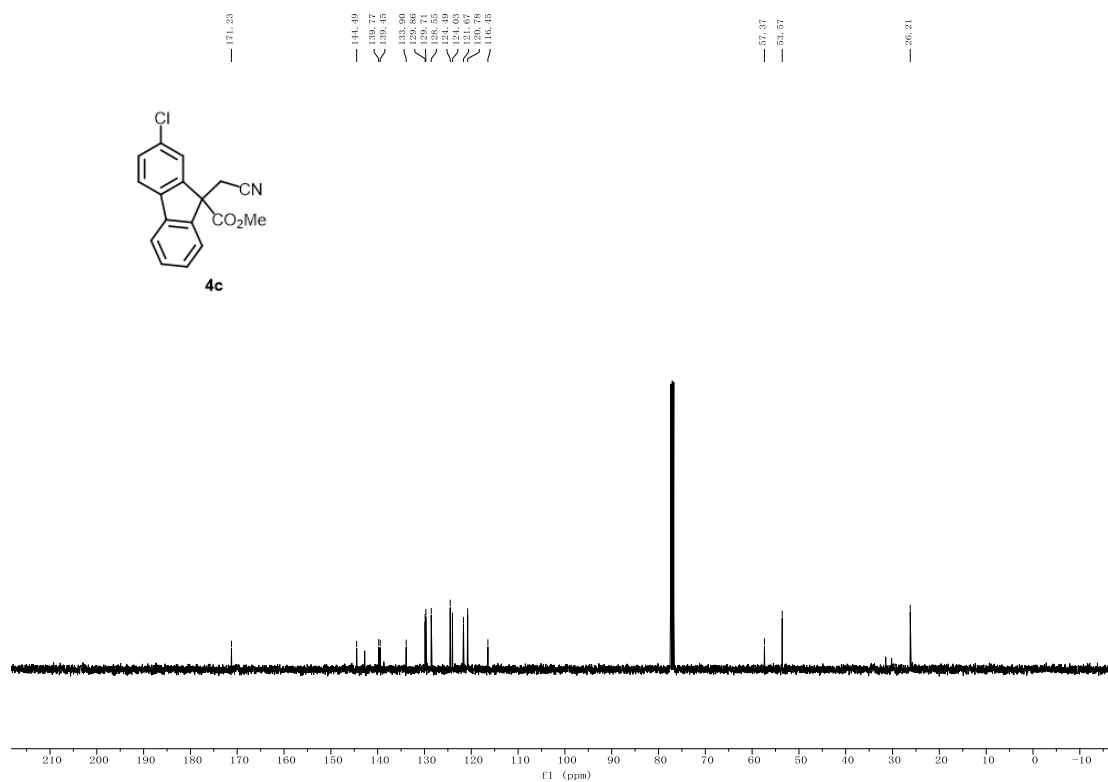

**$^1\text{H}$  NMR of compound **4d** (400 MHz in  $\text{CDCl}_3$ )**

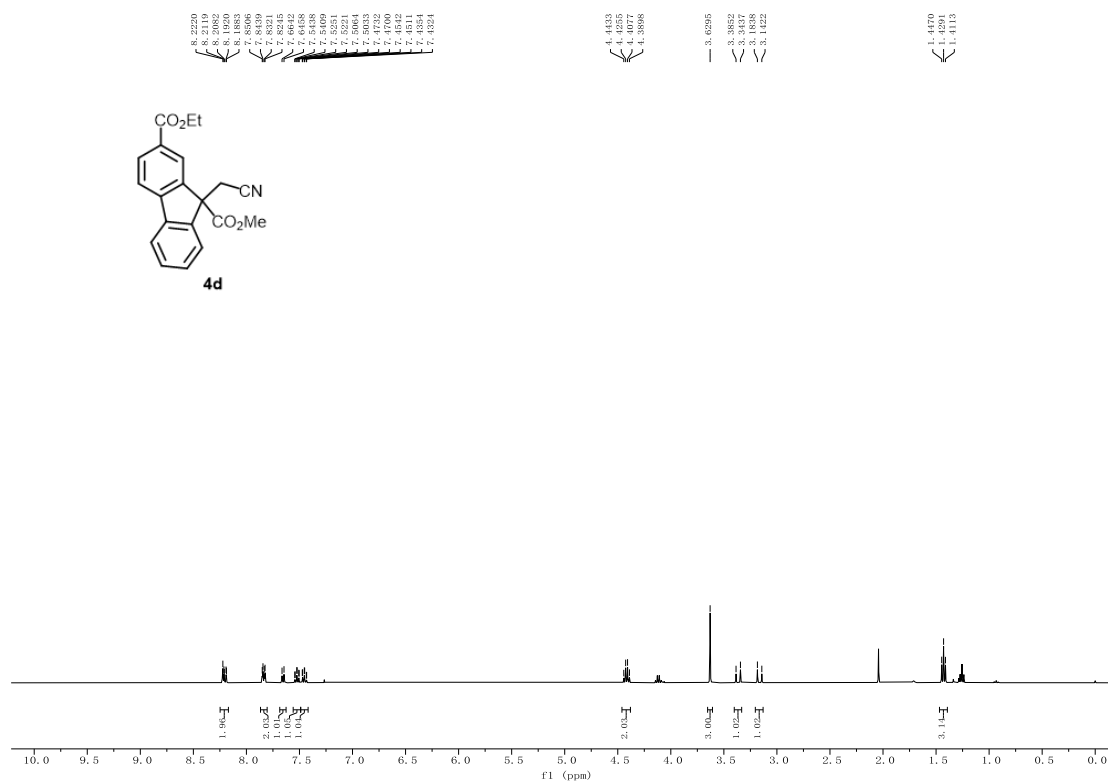

**<sup>13</sup>C NMR of compound 4d (101 MHz in CDCl<sub>3</sub>)**

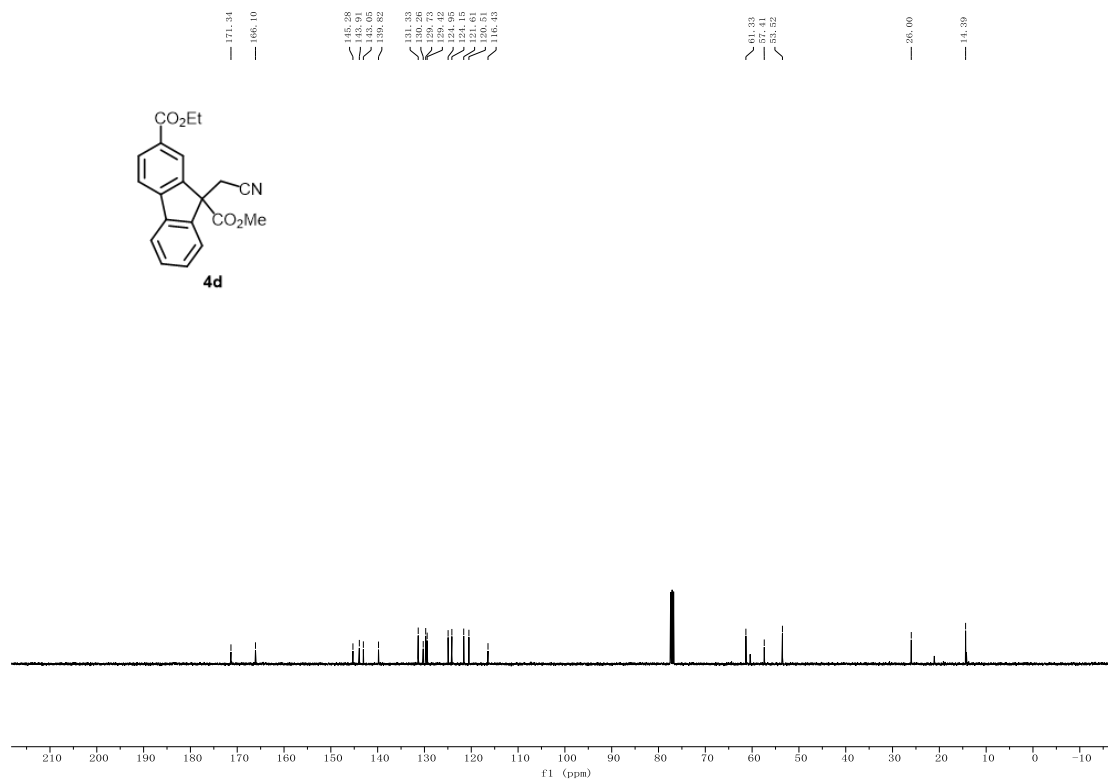

**<sup>1</sup>H NMR of compound 4e (400 MHz in CDCl<sub>3</sub>)**

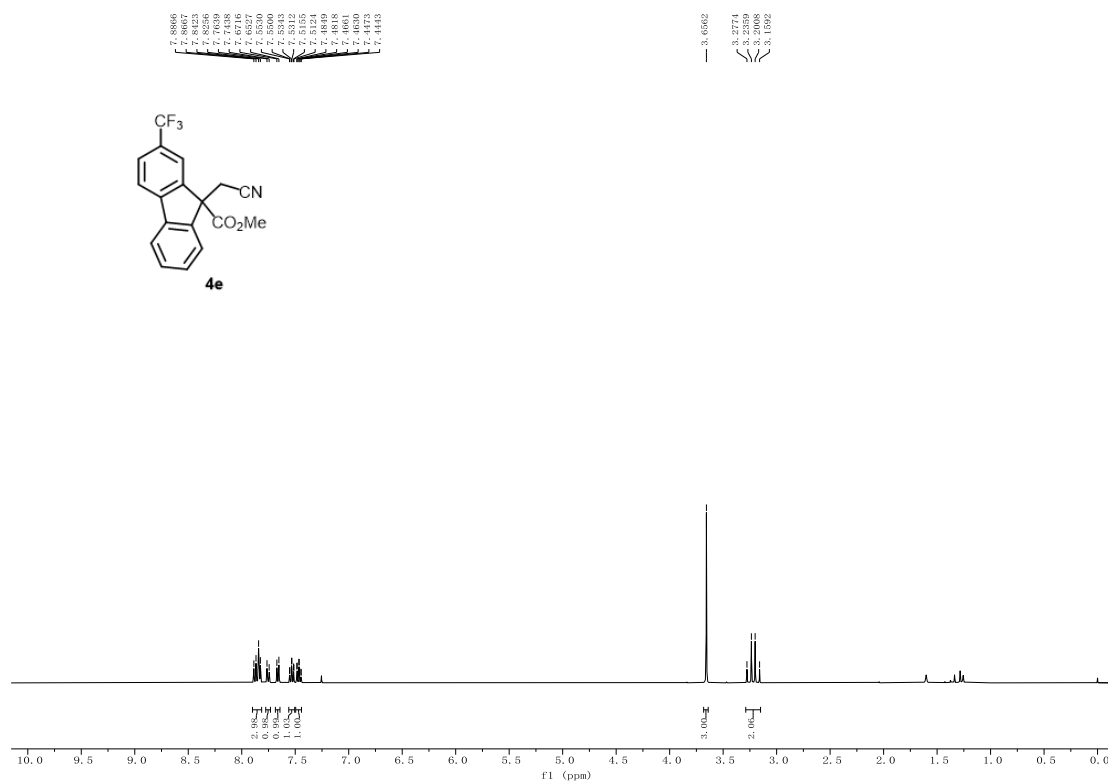

Chemical structure of compound **4e** is shown above the spectrum. The structure is a fluorene derivative with a trifluoromethyl group ( $\text{CF}_3$ ) at position 9, a methyl ester group ( $\text{CO}_2\text{Me}$ ) at position 1, and a cyanoethyl group ( $\text{CH}_2\text{CN}$ ) at position 1.

[illegible]

**<sup>1</sup>H NMR of compound 4f (400 MHz in CDCl<sub>3</sub>)**

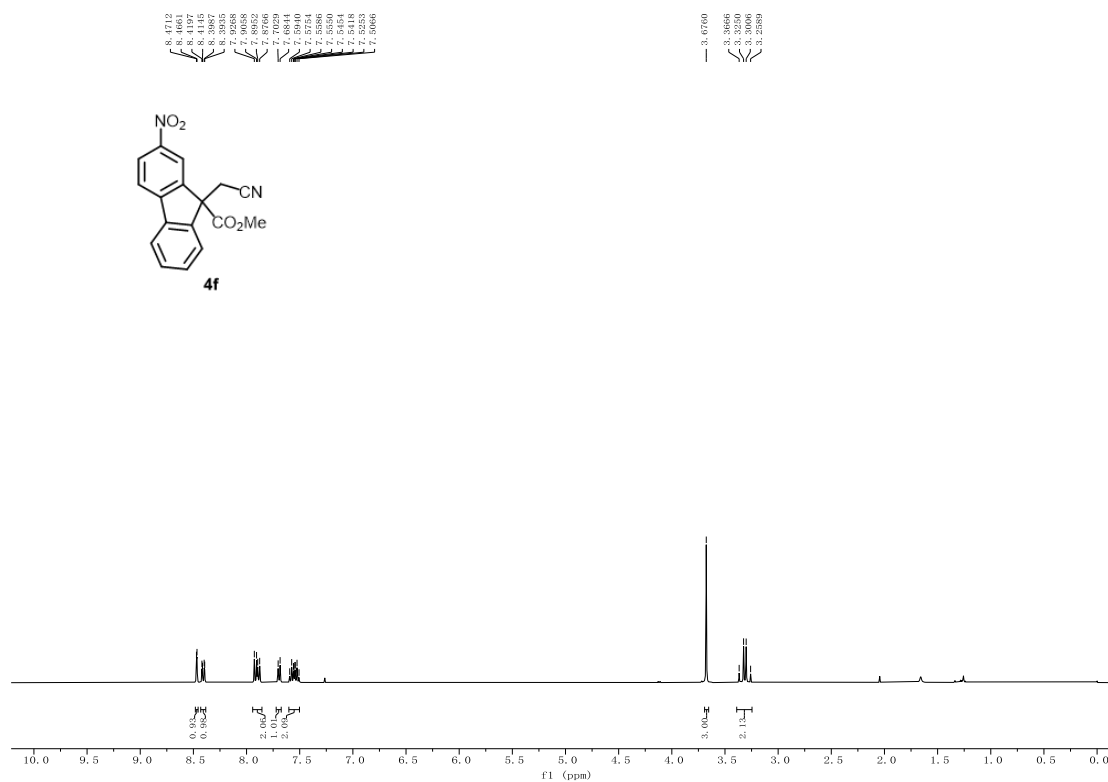

**<sup>13</sup>C NMR of compound 4f (101 MHz in CDCl<sub>3</sub>)**

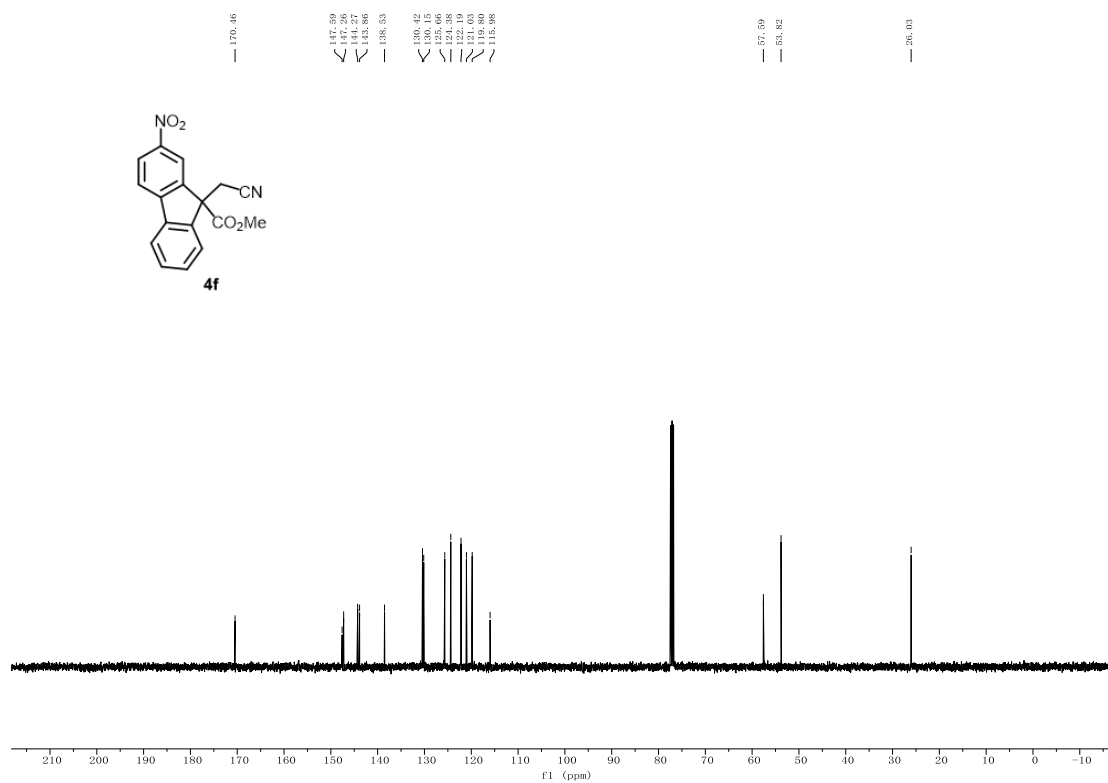

**<sup>1</sup>H NMR of compound **4g** (400 MHz in CDCl<sub>3</sub>)**

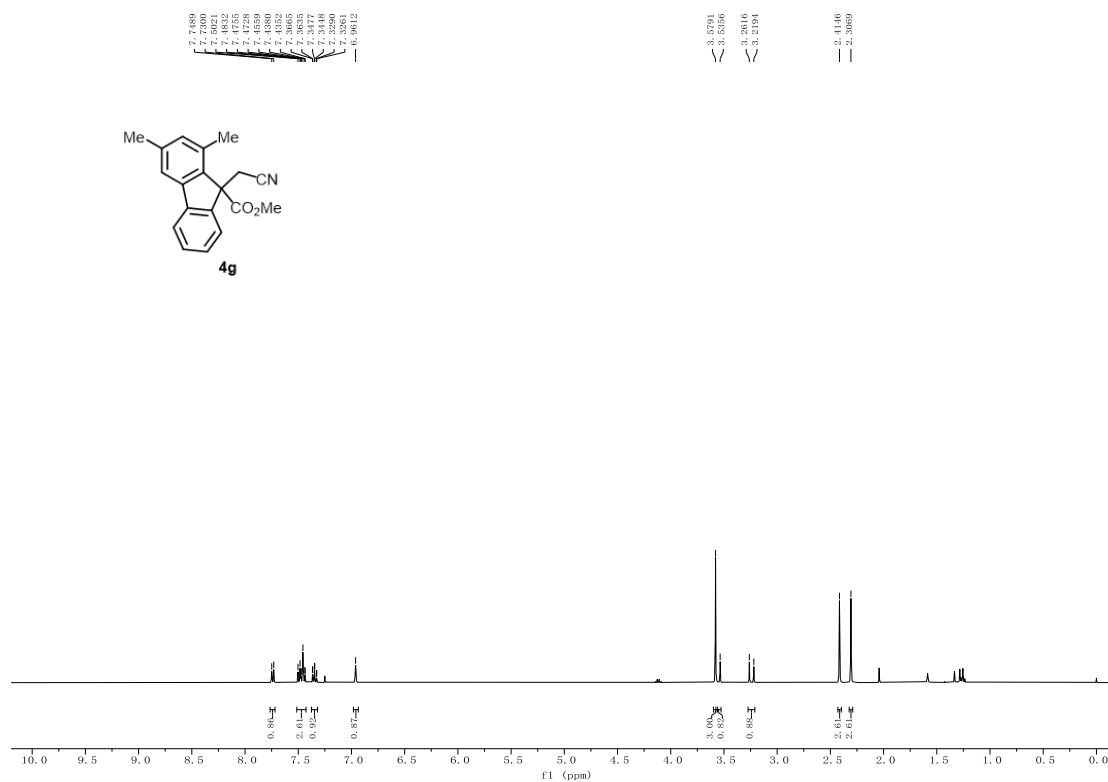

**<sup>13</sup>C NMR of compound **4g** (101 MHz in CDCl<sub>3</sub>)**

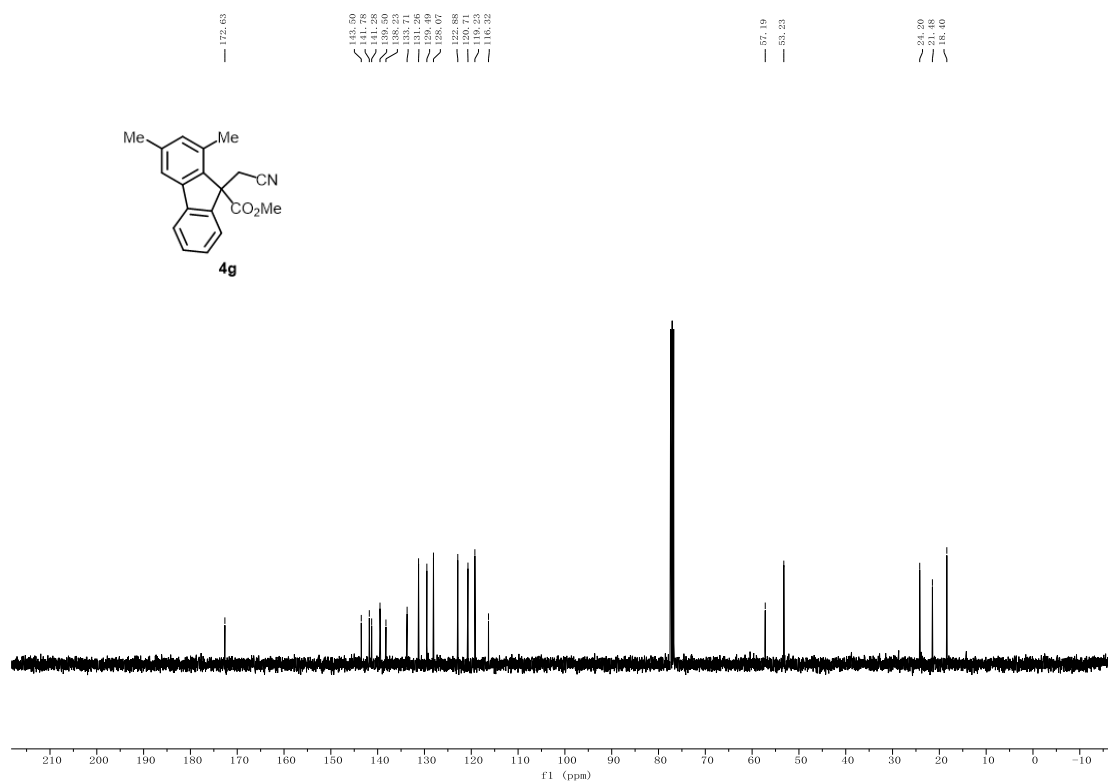

**$^1\text{H}$  NMR of compound **4h** (400 MHz in  $\text{CDCl}_3$ )**

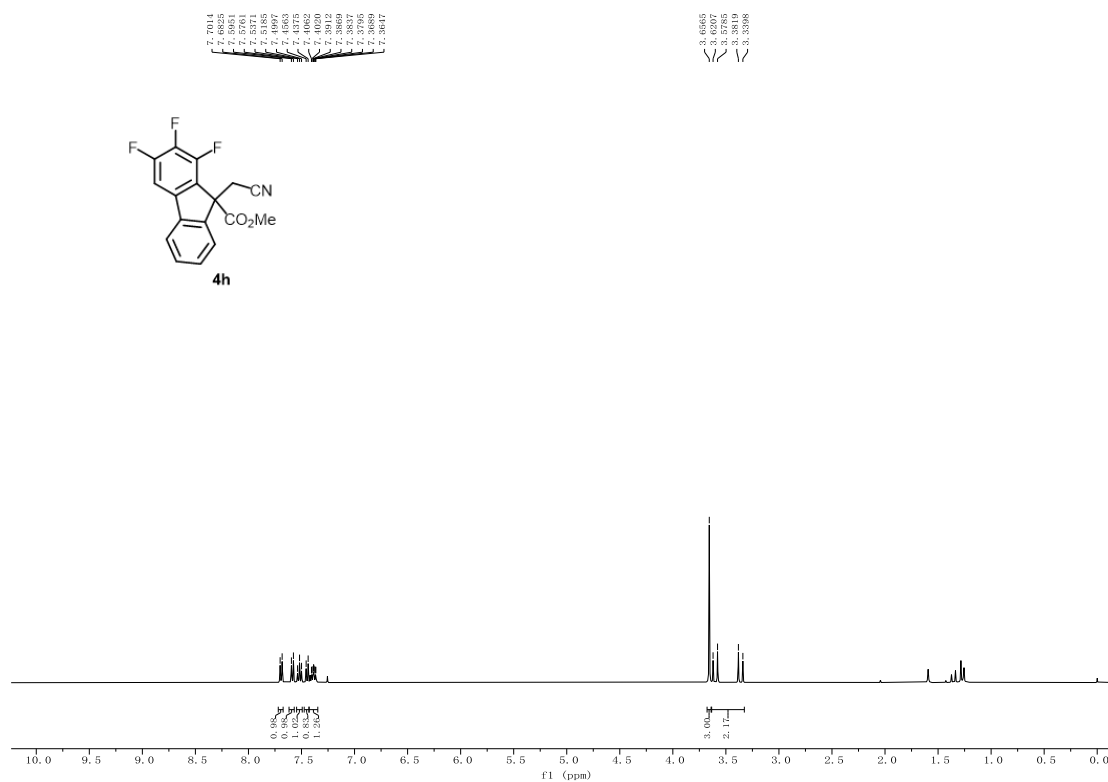

**$^{19}\text{F}$  NMR of compound **4h** (377 MHz in  $\text{CDCl}_3$ )**

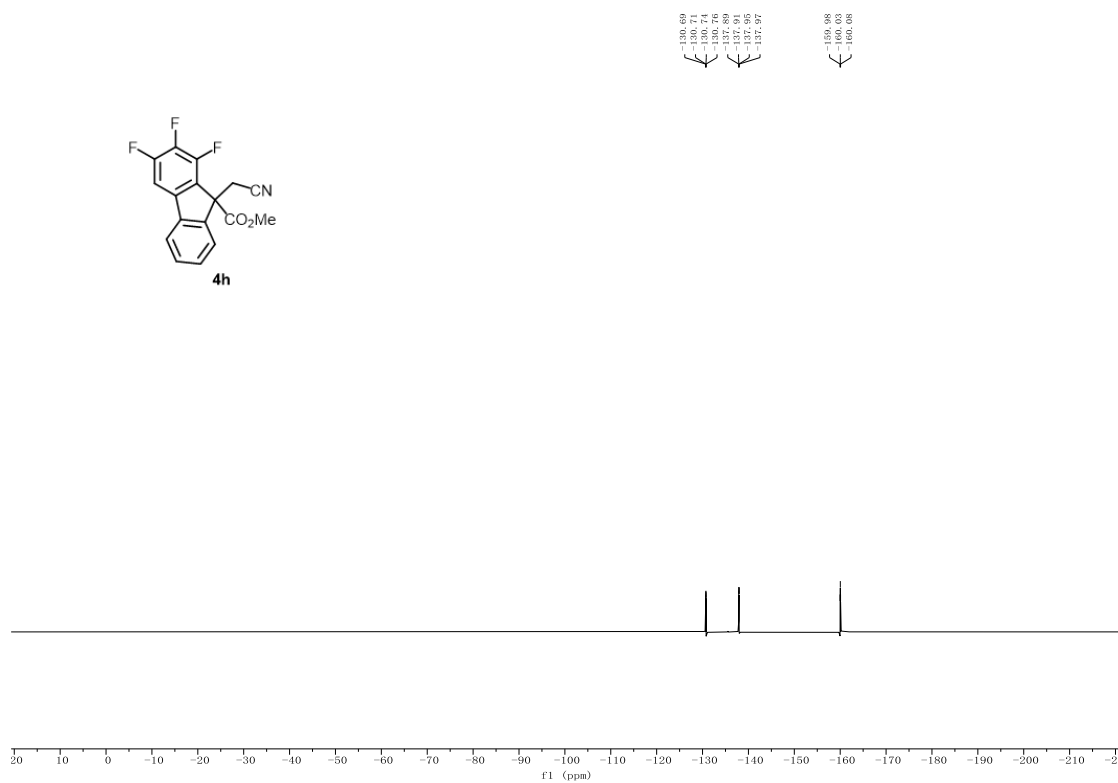

**$^{13}\text{C}$  NMR of compound **4h** (101 MHz in  $\text{CDCl}_3$ )**

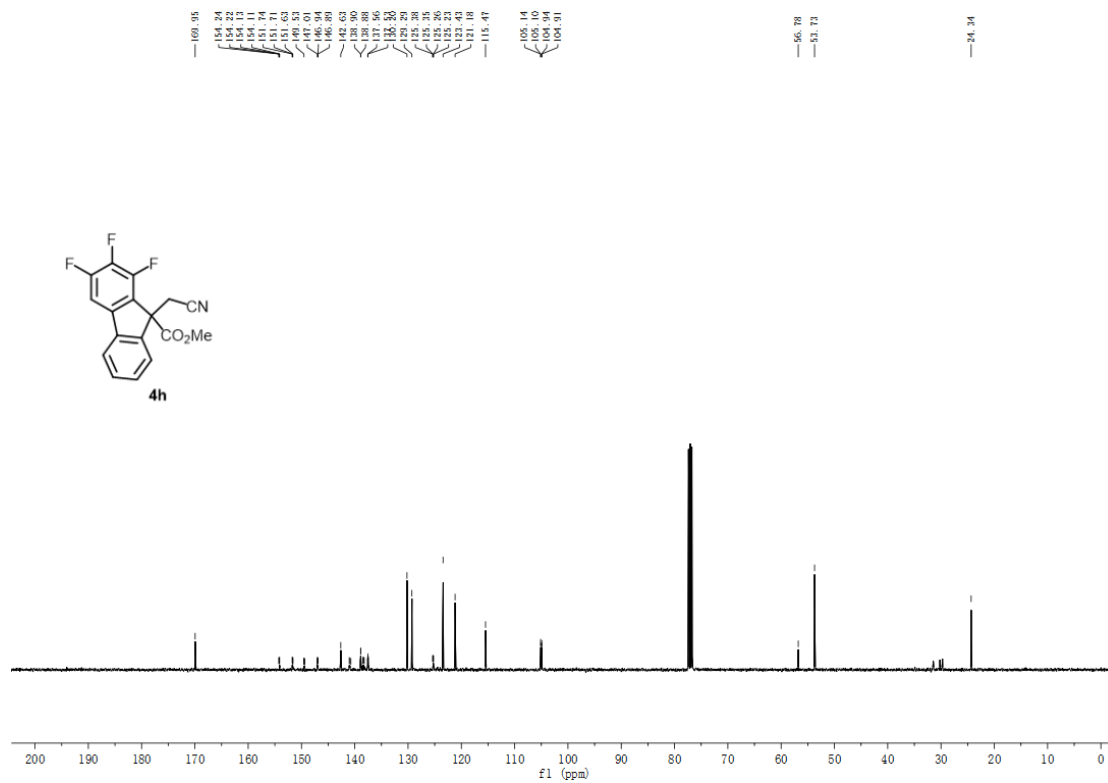

**$^1\text{H}$  NMR of compound **4i** (400 MHz in  $\text{CDCl}_3$ )**

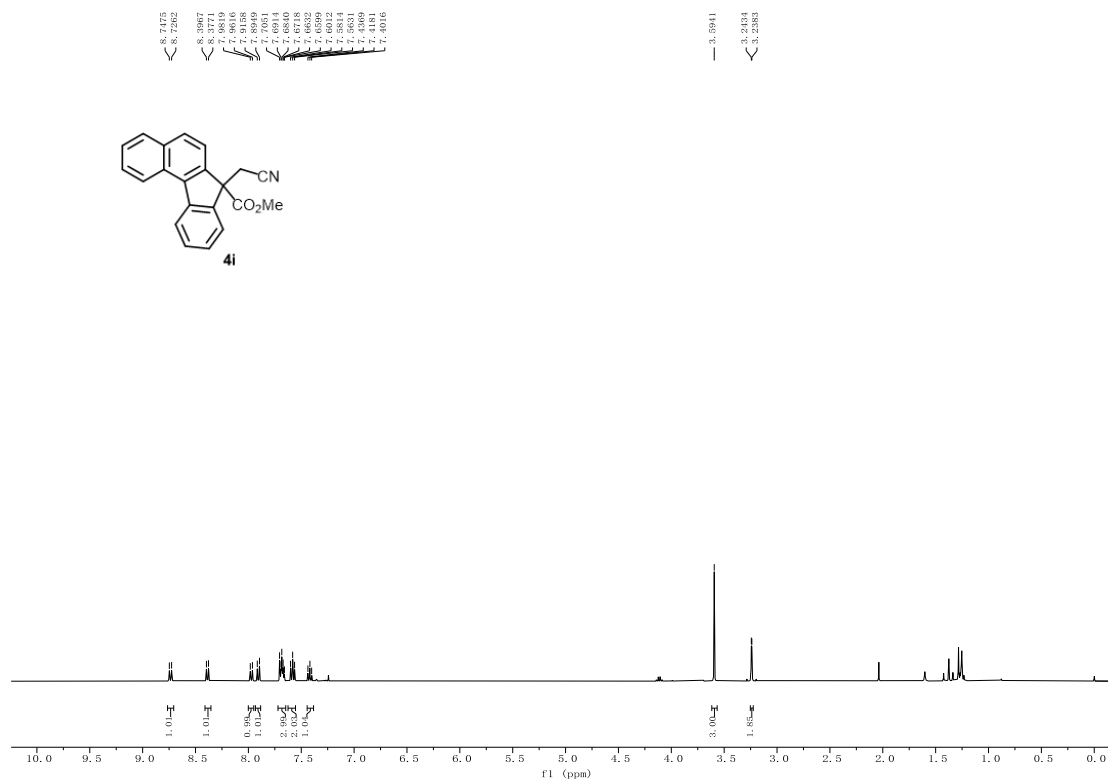

**$^{13}\text{C}$  NMR of compound **4i** (101 MHz in  $\text{CDCl}_3$ )**

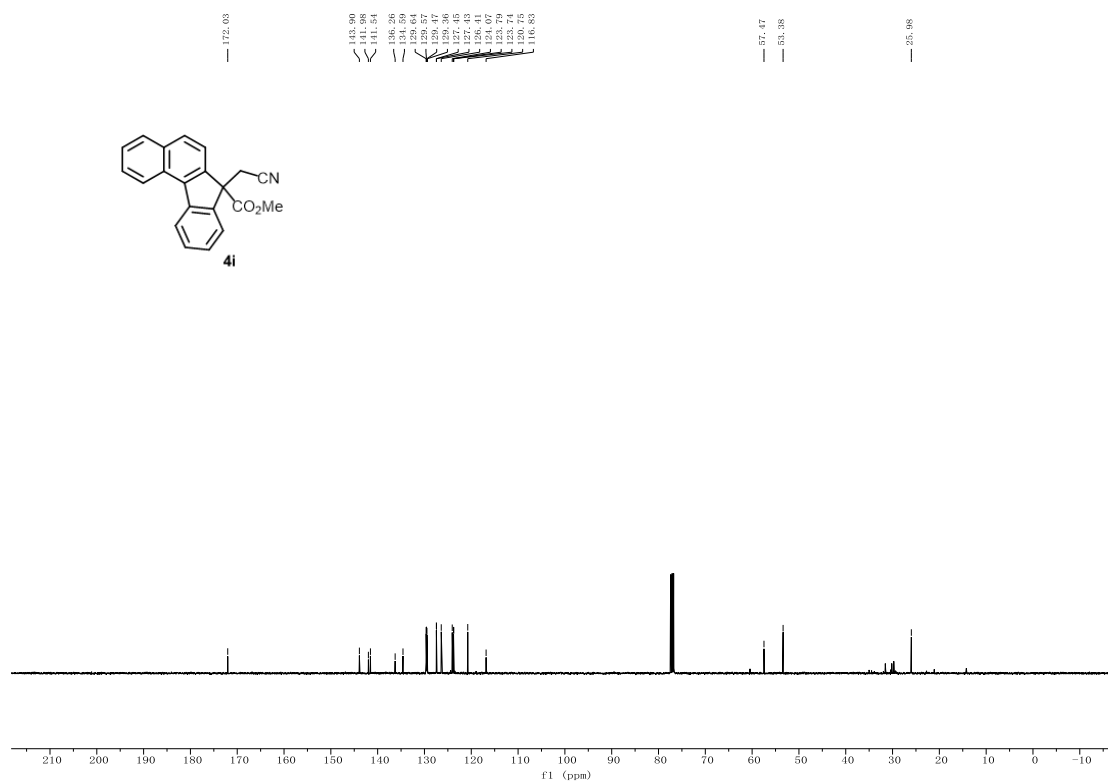

**$^1\text{H}$  NMR of compound **4j** (400 MHz in  $\text{CDCl}_3$ )**

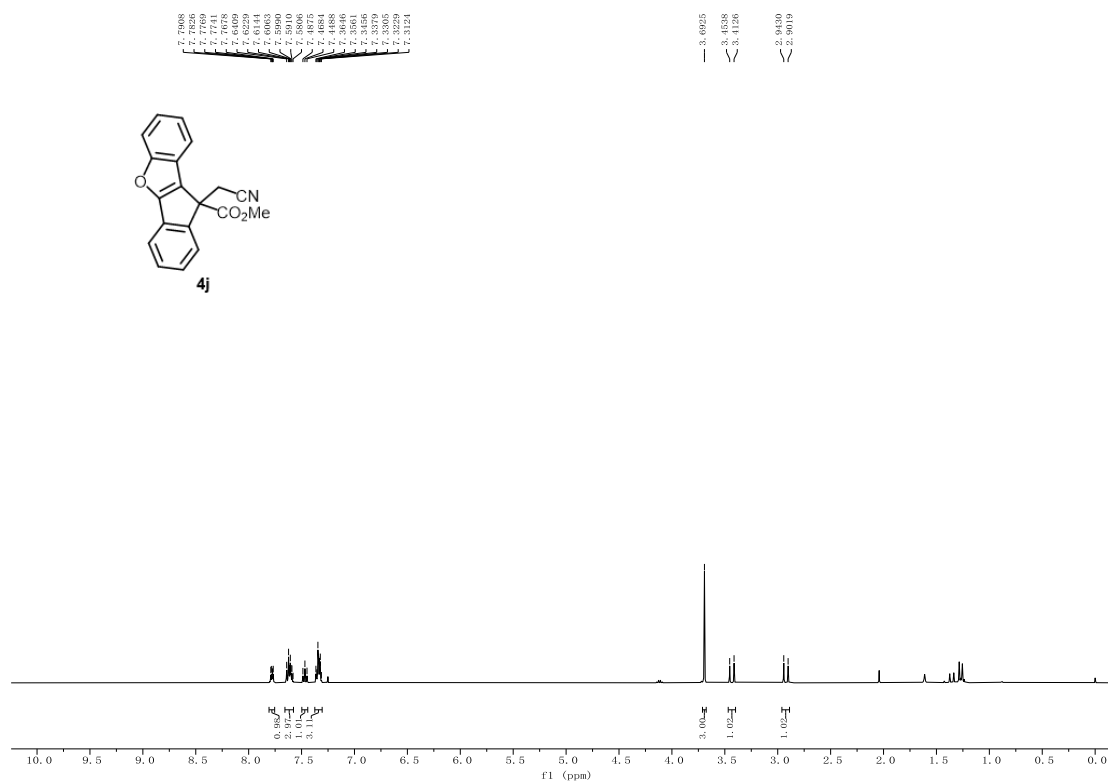

**<sup>13</sup>C NMR of compound 4j (101 MHz in CDCl<sub>3</sub>)**

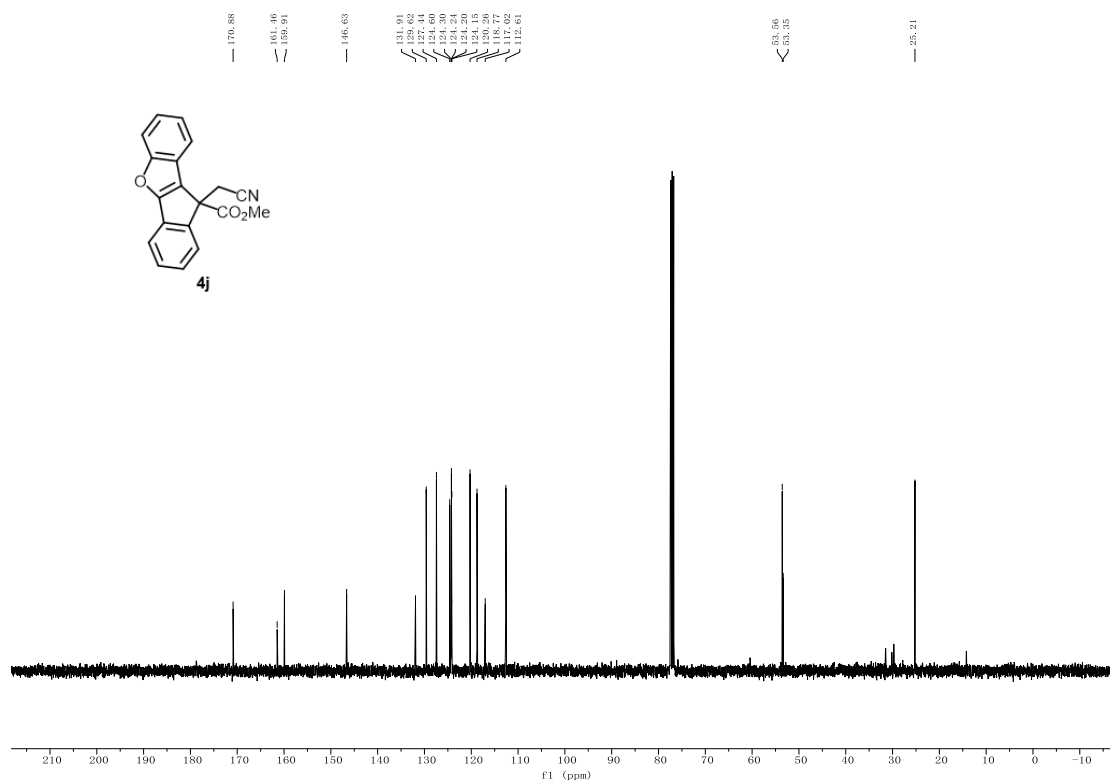

**<sup>1</sup>H NMR of compound 4k (400 MHz in CDCl<sub>3</sub>)**

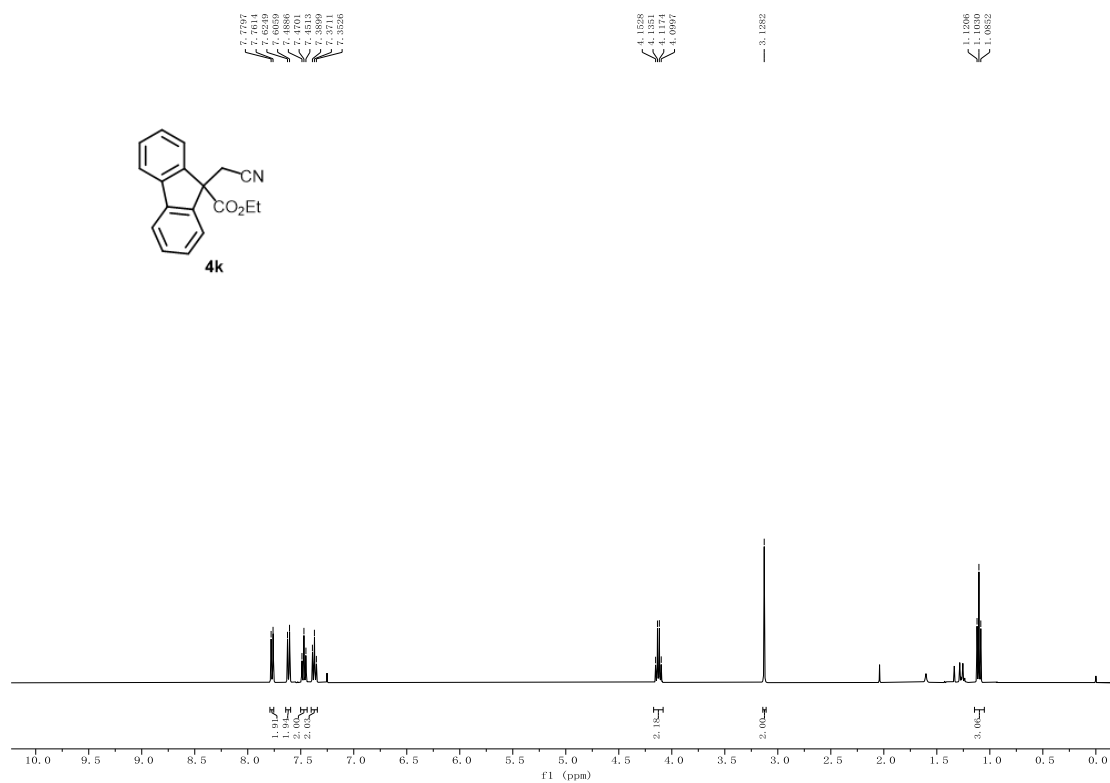

**$^{13}\text{C}$  NMR of compound **4k** (101 MHz in  $\text{CDCl}_3$ )**

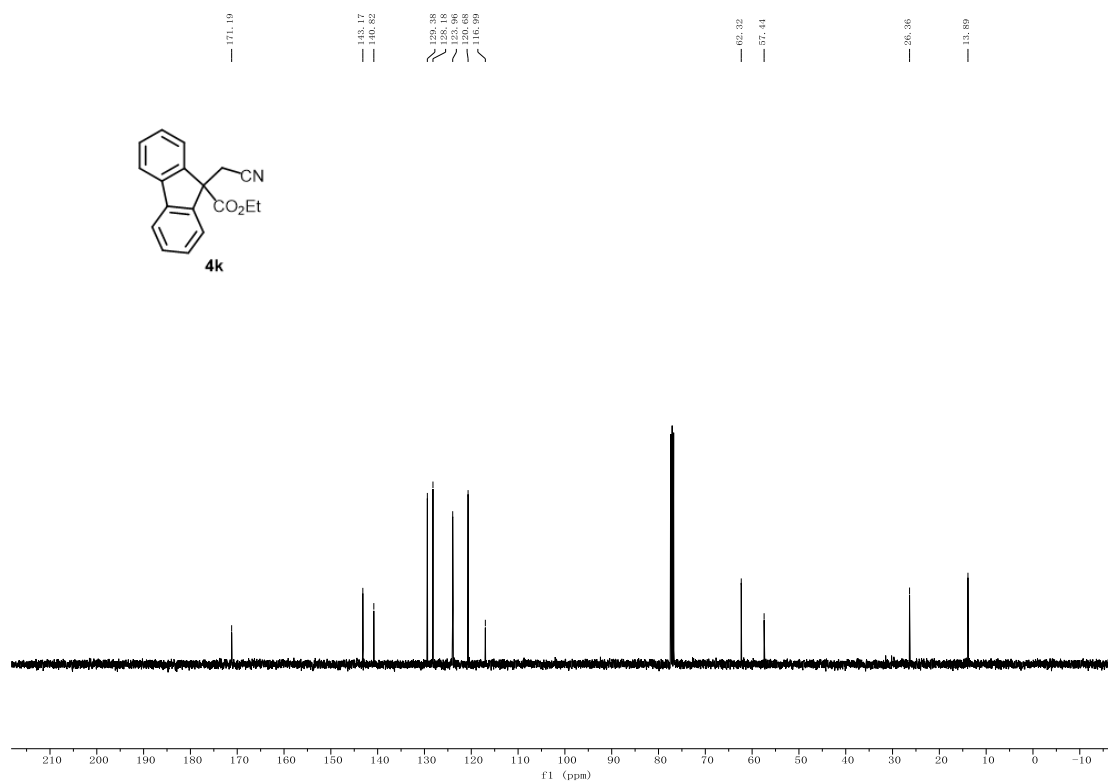

**$^1\text{H}$  NMR of compound **6a** (400 MHz in  $\text{CDCl}_3$ )**

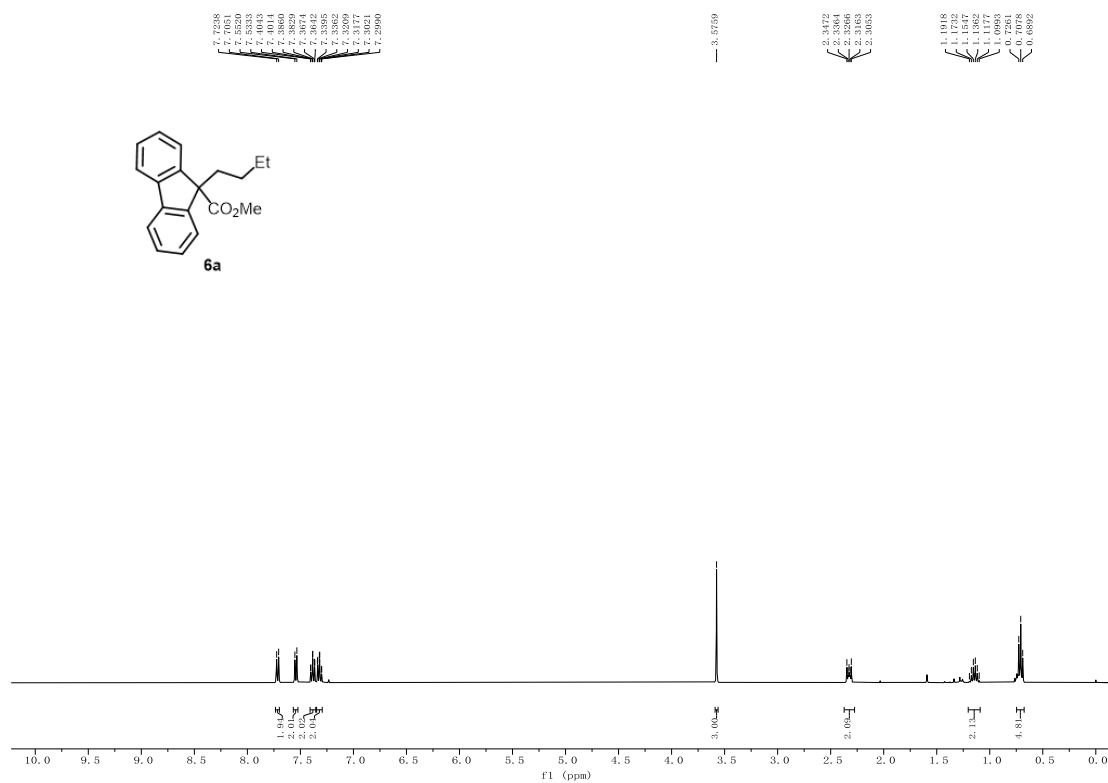

**<sup>13</sup>C NMR of compound 6a (101 MHz in CDCl<sub>3</sub>)**

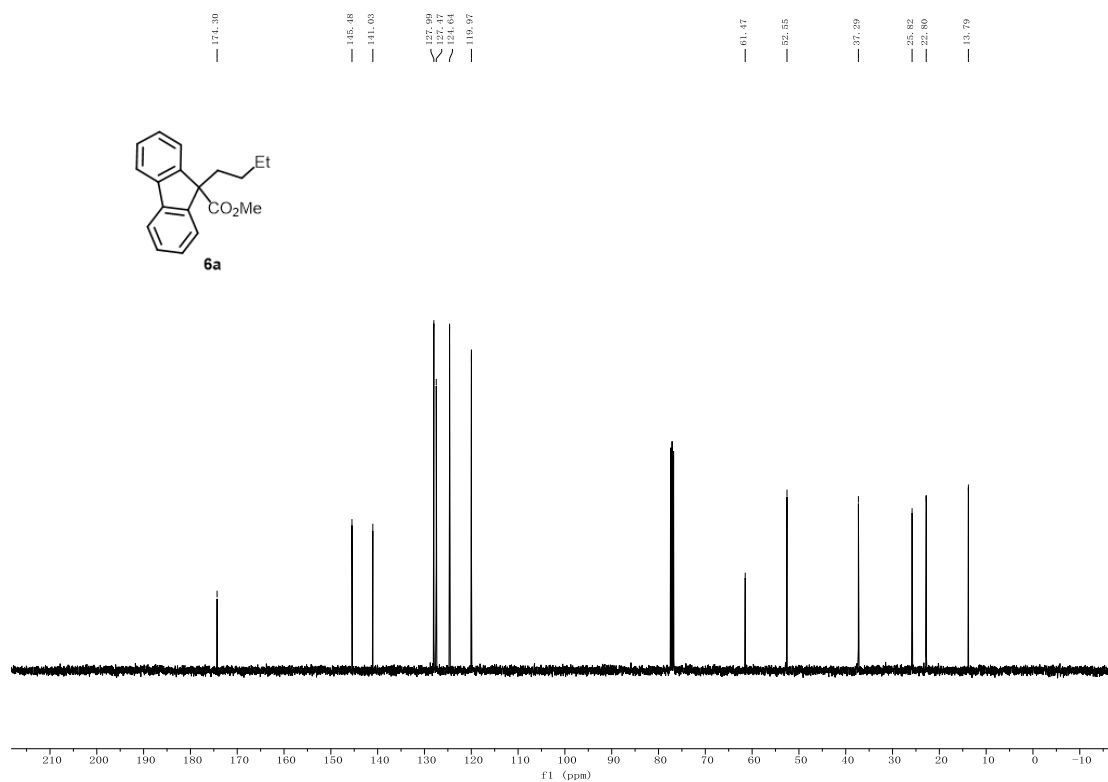

**<sup>1</sup>H NMR of compound 6b (400 MHz in CDCl<sub>3</sub>)**

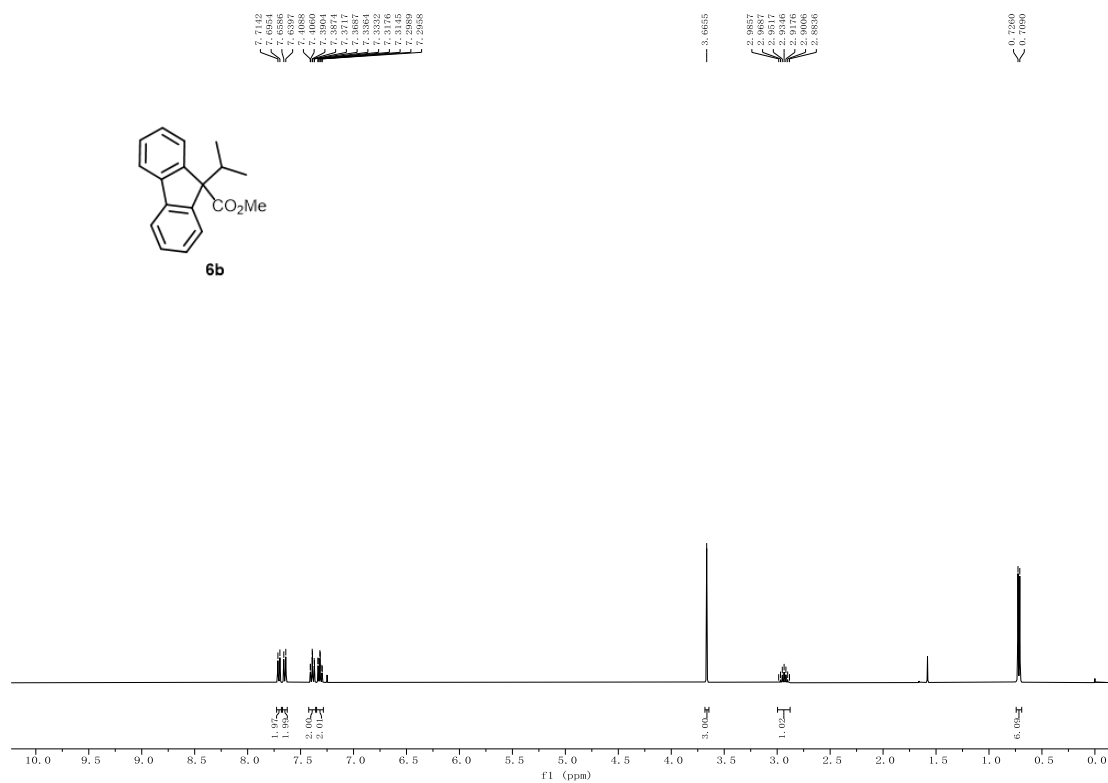

**<sup>13</sup>C NMR of compound 6b (101 MHz in CDCl<sub>3</sub>)**

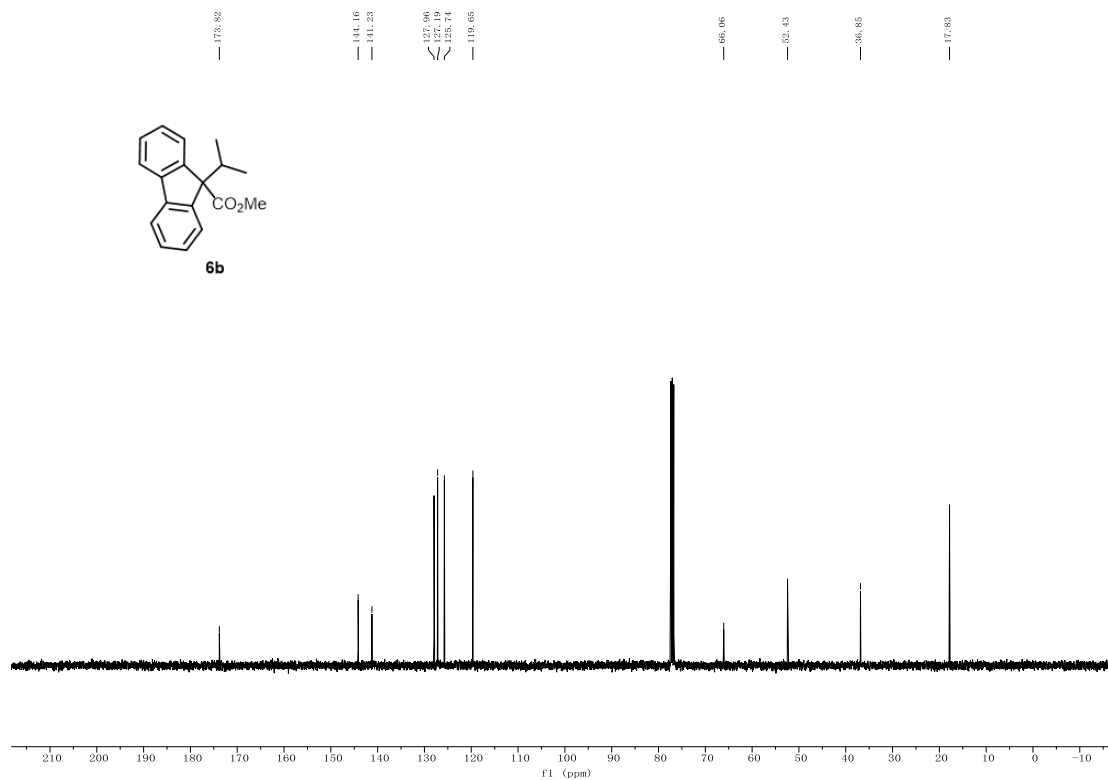

**<sup>1</sup>H NMR of compound 6c (400 MHz in CDCl<sub>3</sub>)**

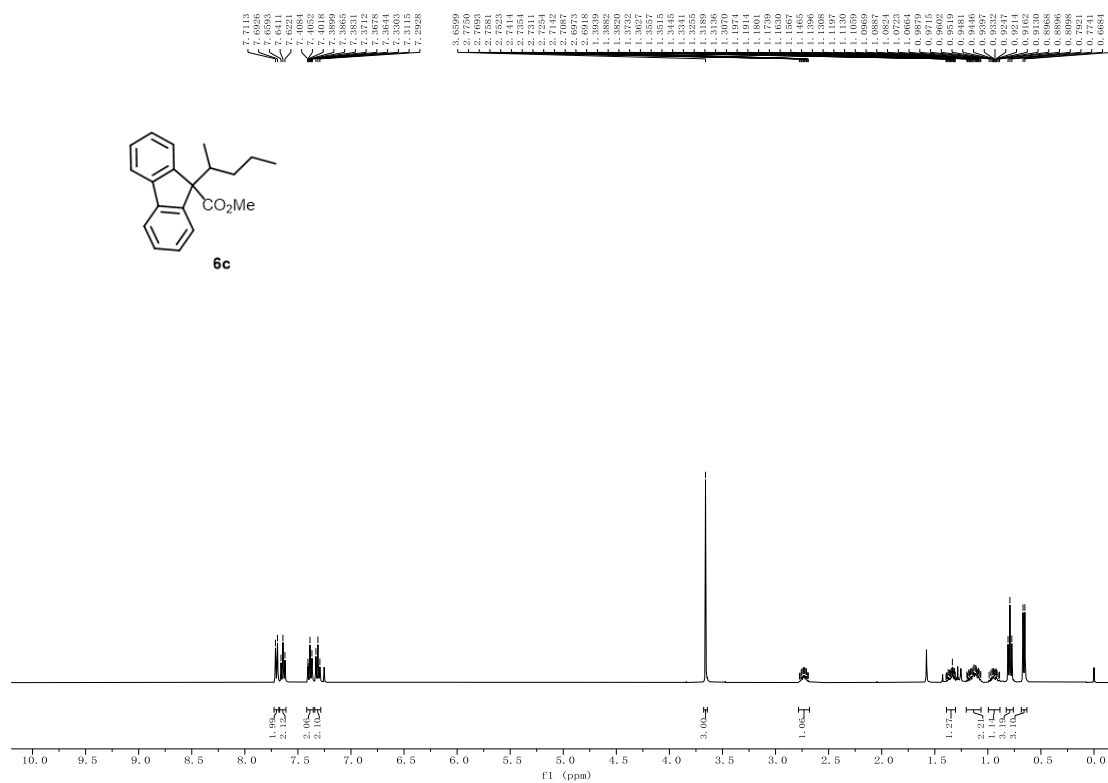

**<sup>13</sup>C NMR of compound 6c (101 MHz in CDCl<sub>3</sub>)**

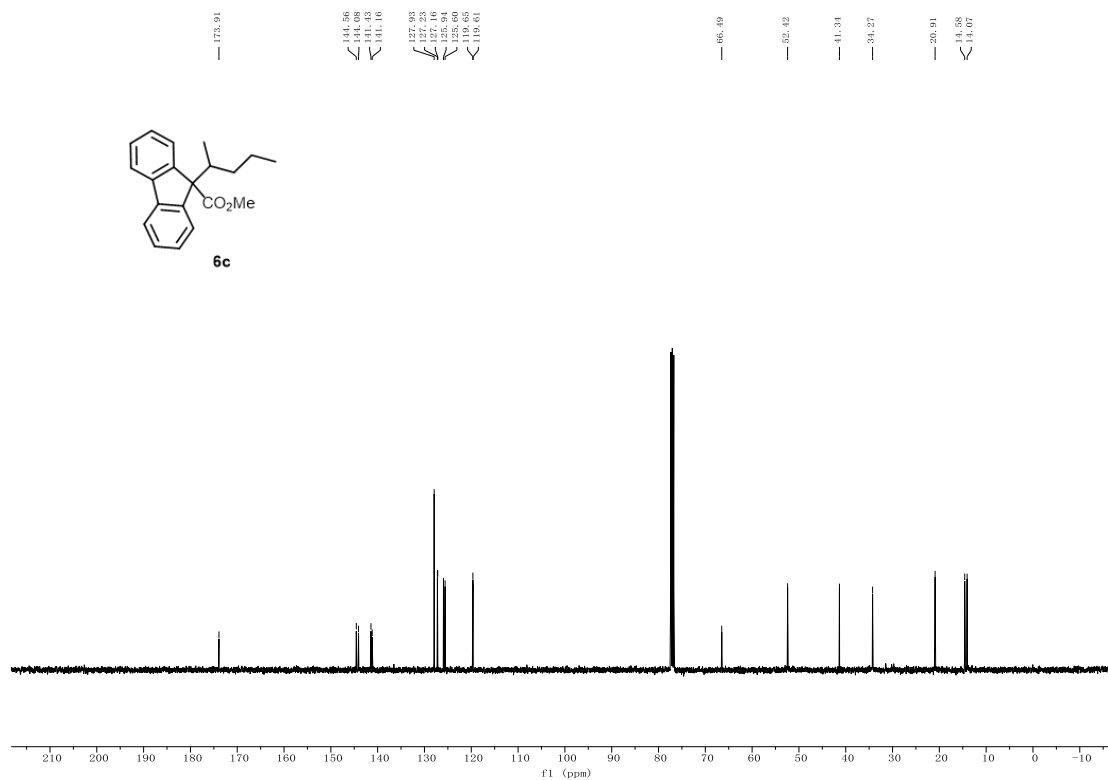

**<sup>1</sup>H NMR of compound 6d (400 MHz in CDCl<sub>3</sub>)**

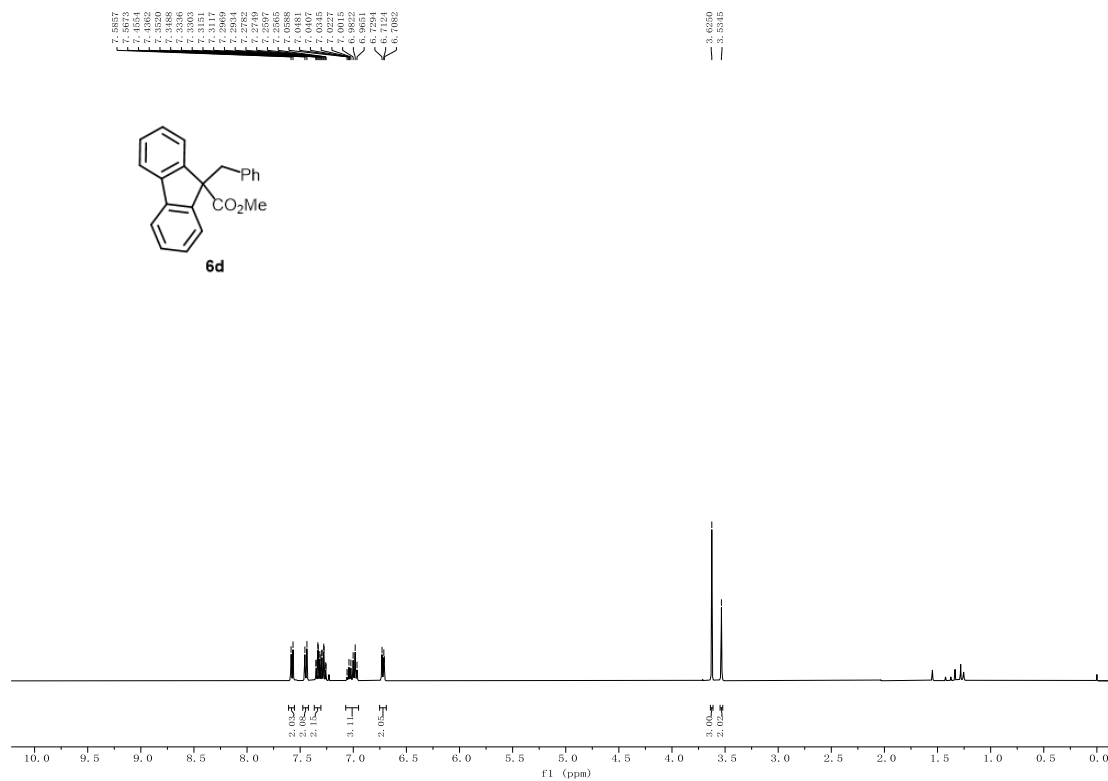

**$^{13}\text{C}$  NMR of compound **6d** (101 MHz in  $\text{CDCl}_3$ )**

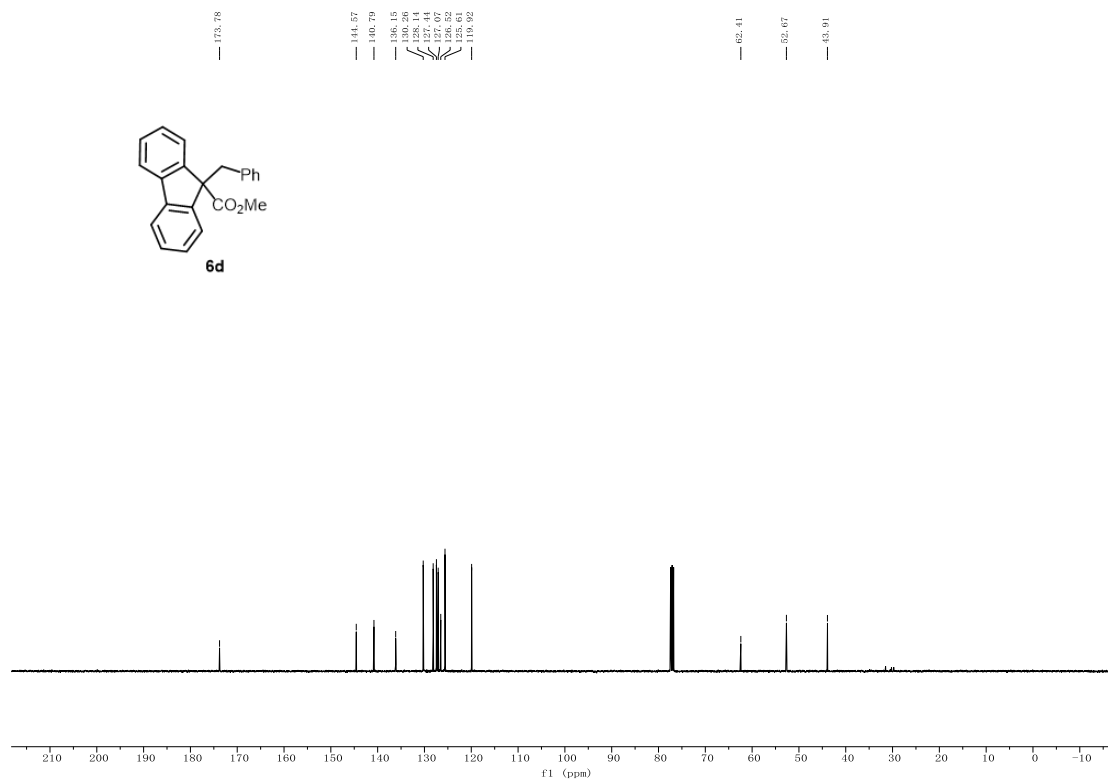

**$^1\text{H}$  NMR of compound **6e** (400 MHz in  $\text{CDCl}_3$ )**

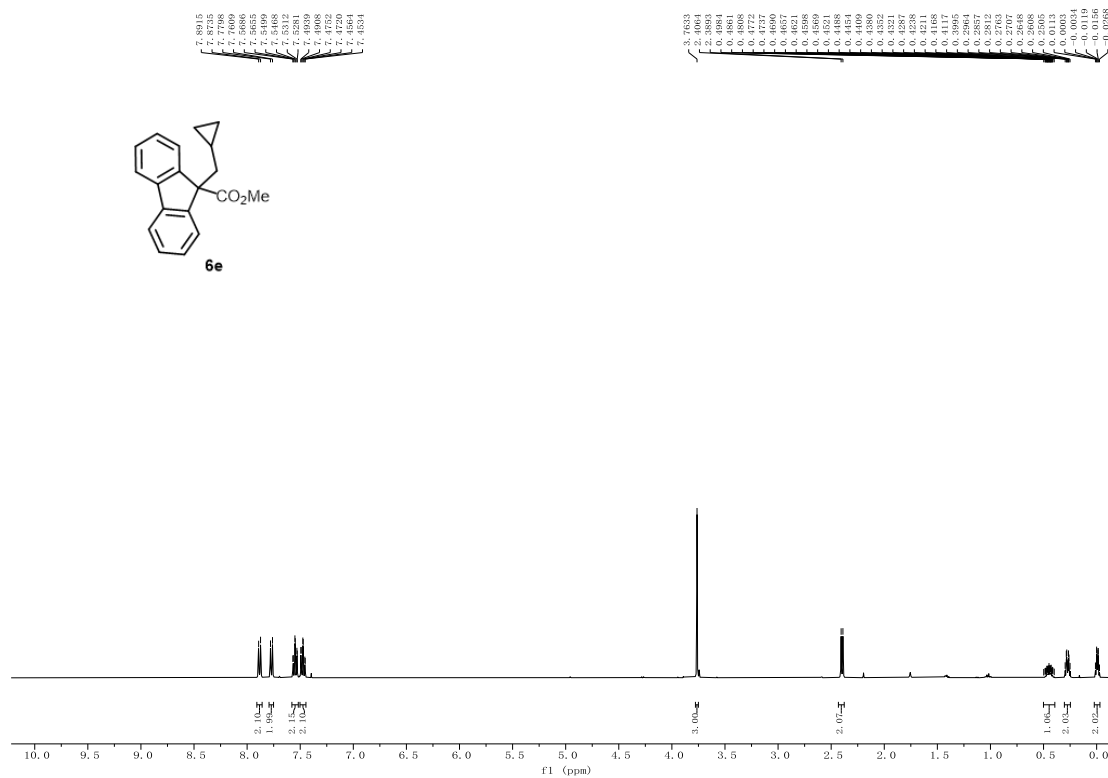

**<sup>13</sup>C NMR of compound 6e (101 MHz in CDCl<sub>3</sub>)**

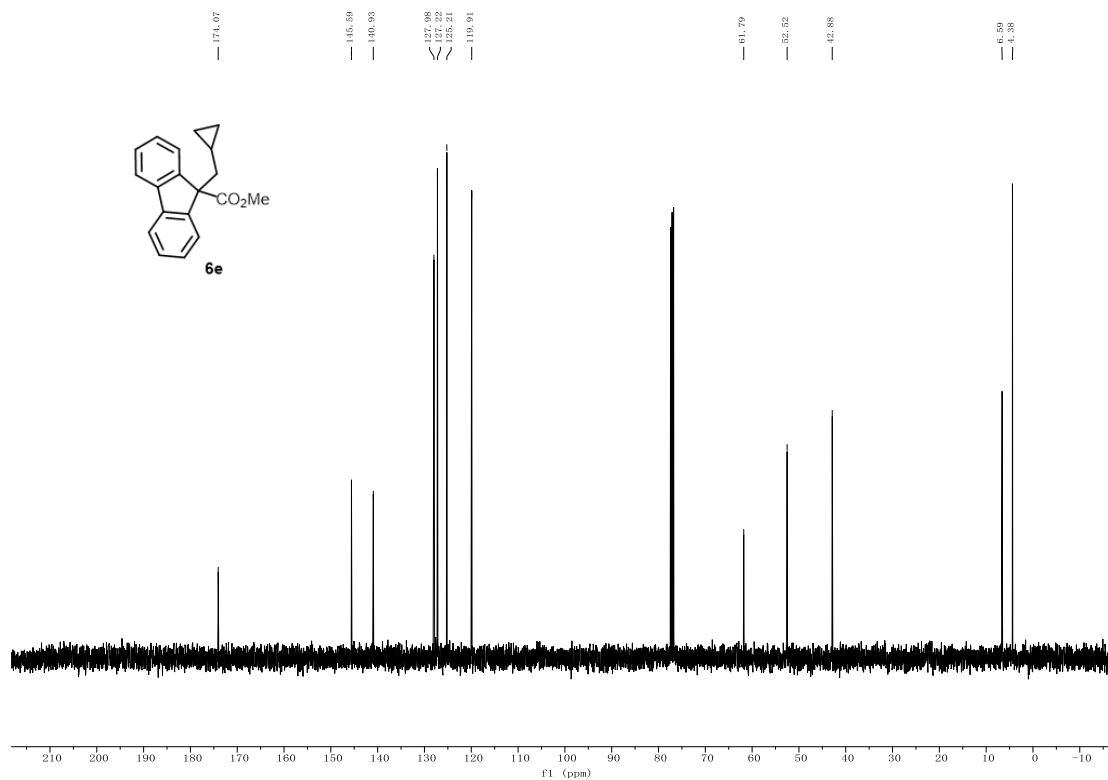

**<sup>1</sup>H NMR of compound 6f (400 MHz in CDCl<sub>3</sub>)**

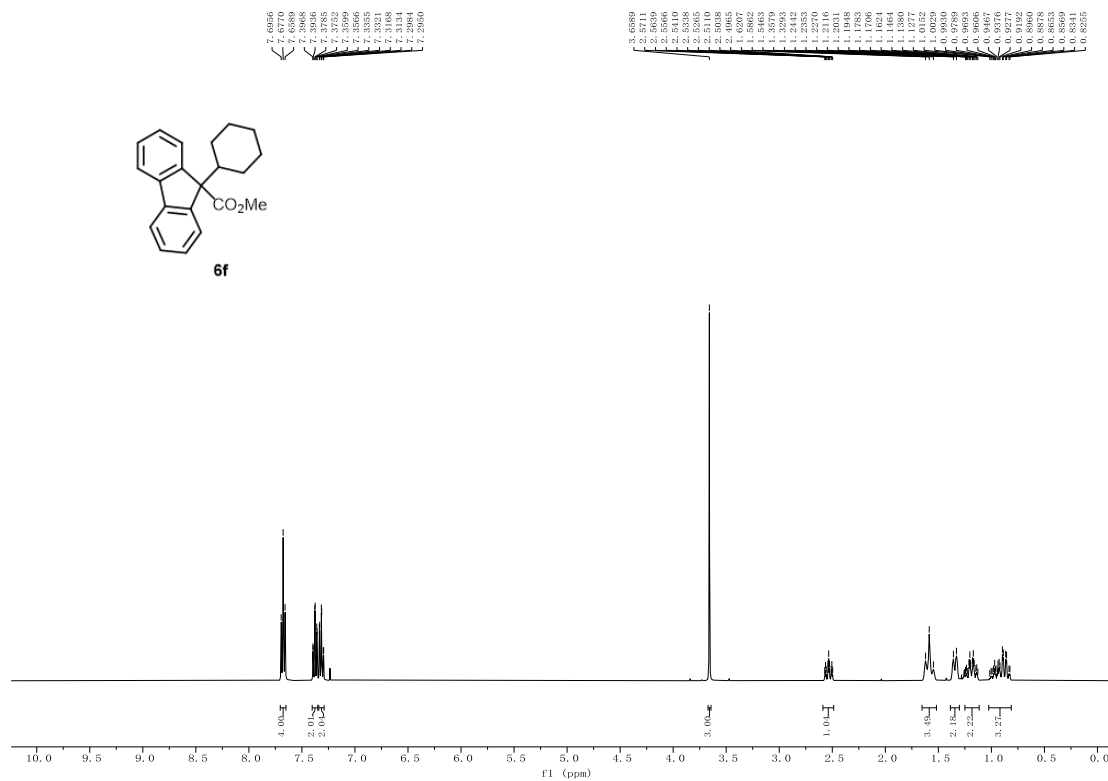

**<sup>13</sup>C NMR of compound 6f (101 MHz in CDCl<sub>3</sub>)**

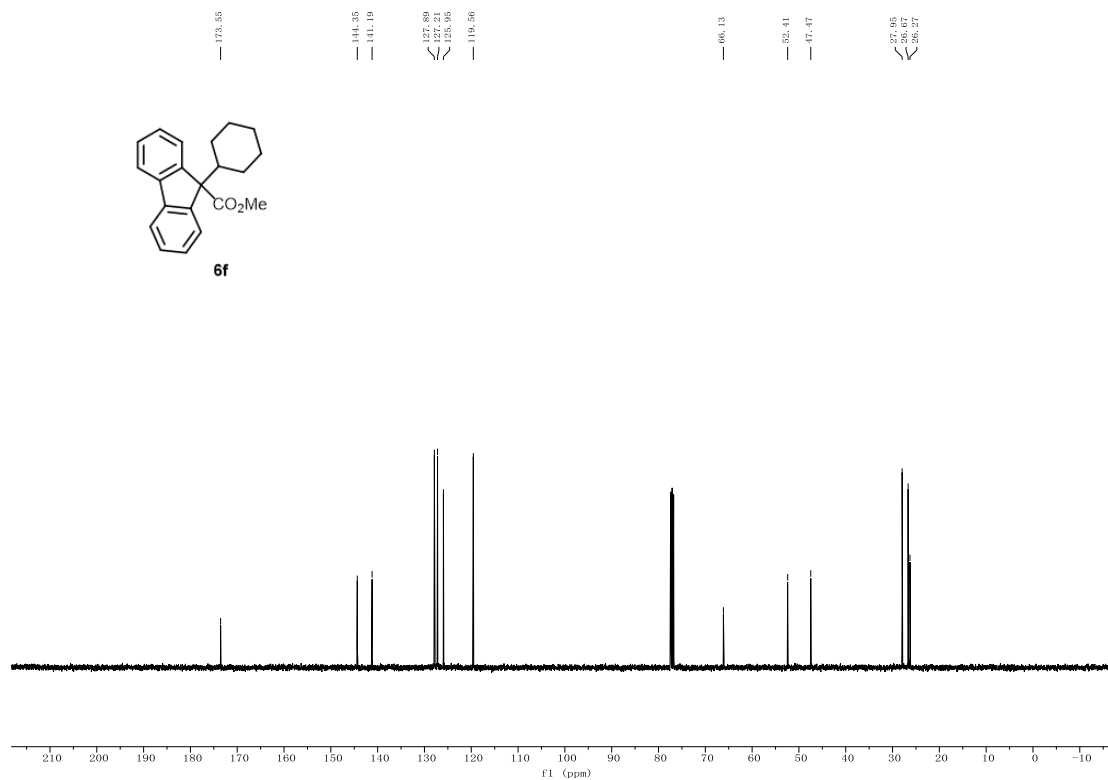

**<sup>1</sup>H NMR of compound 6g (400 MHz in CDCl<sub>3</sub>)**

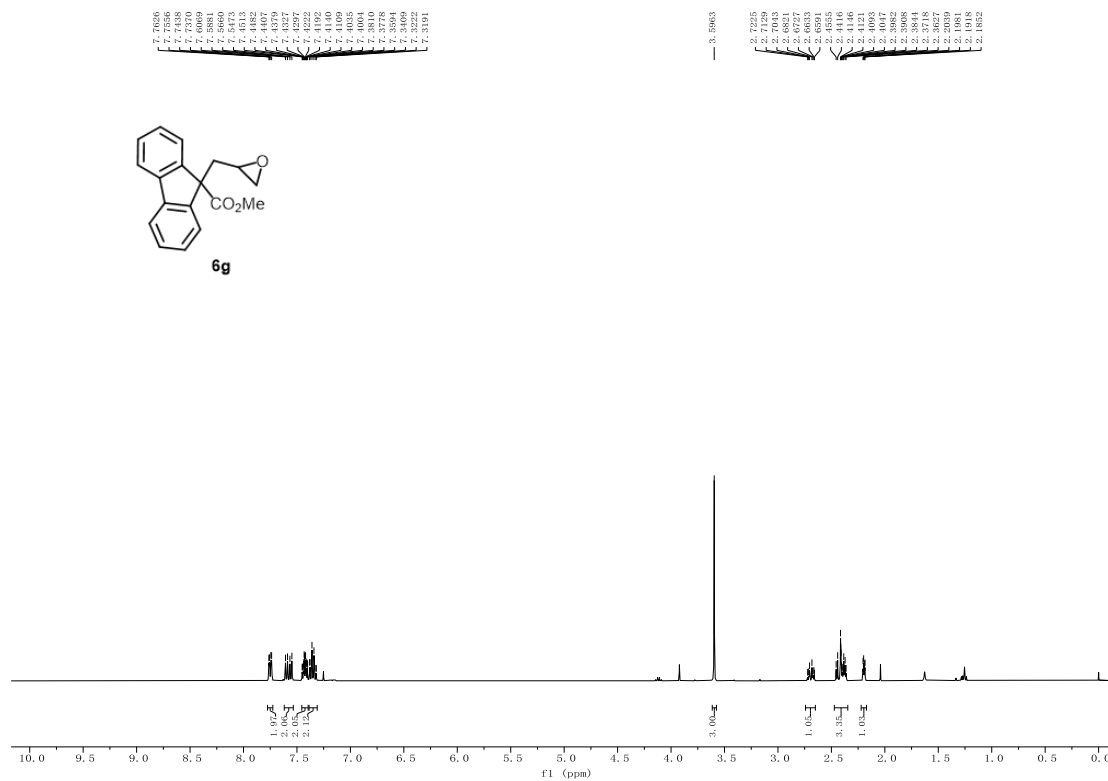

**$^{13}\text{C}$  NMR of compound **6g** (101 MHz in  $\text{CDCl}_3$ )**

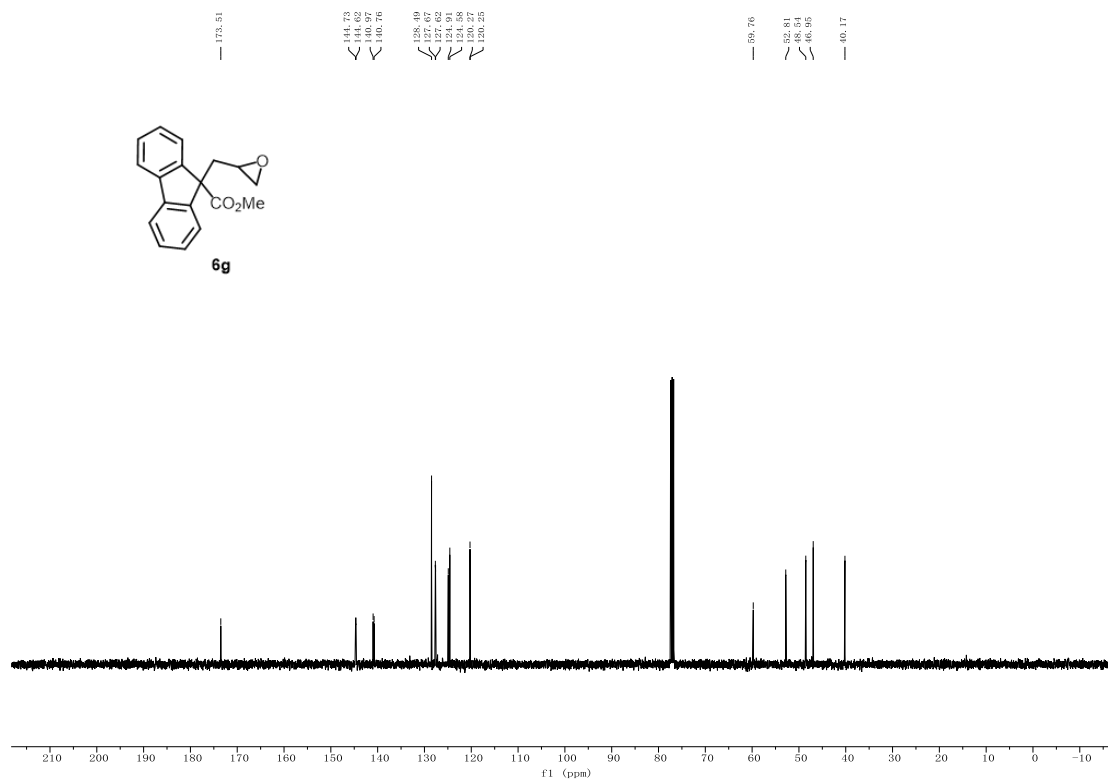

**$^1\text{H}$  NMR of compound **6h** (400 MHz in  $\text{CDCl}_3$ )**

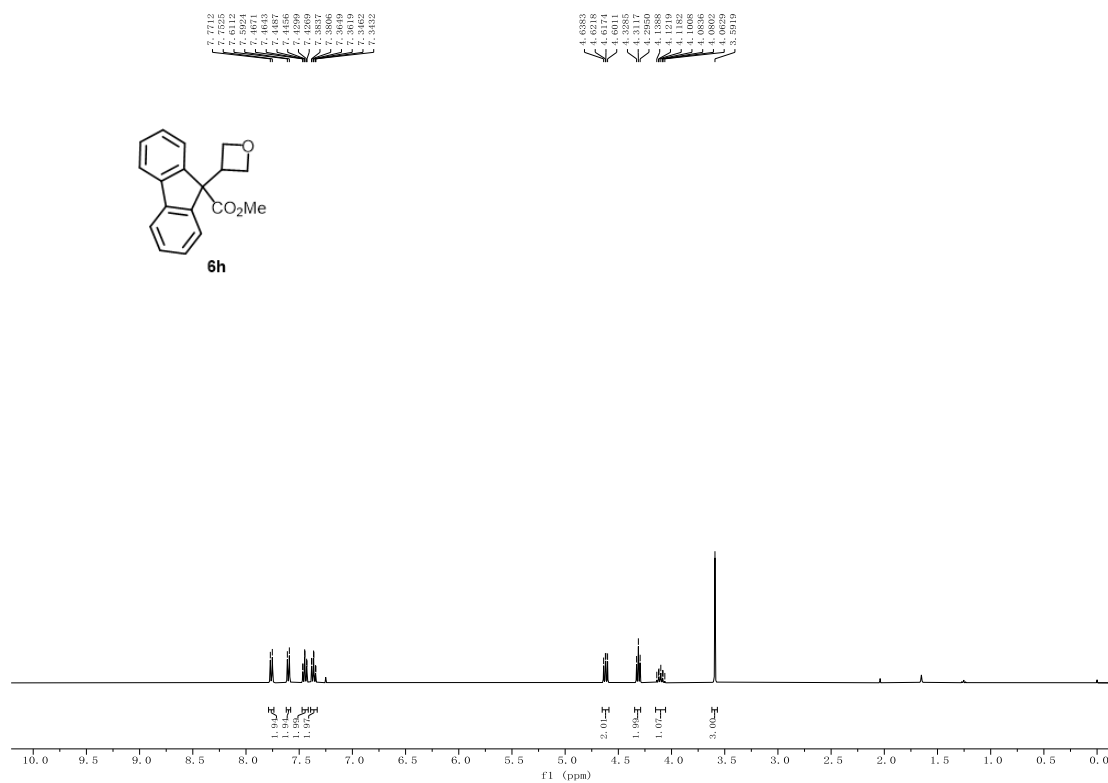

**<sup>13</sup>C NMR of compound 6h (101 MHz in CDCl<sub>3</sub>)**

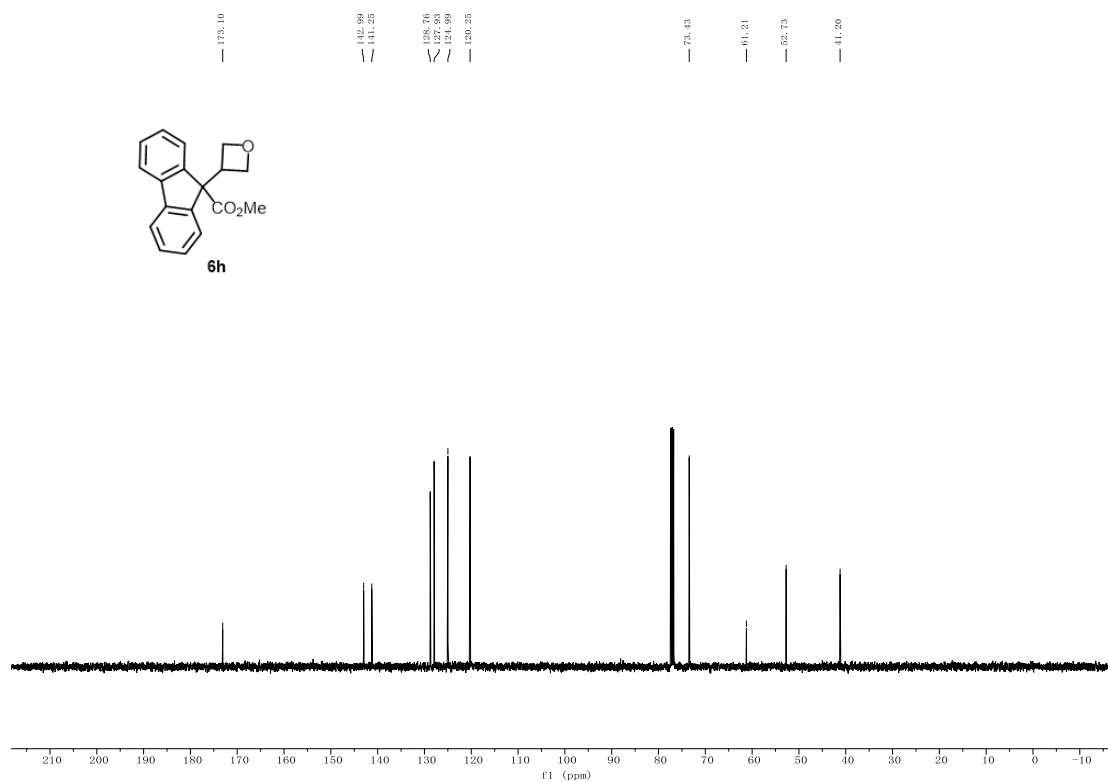

**<sup>1</sup>H NMR of compound 6i (400 MHz in CDCl<sub>3</sub>)**

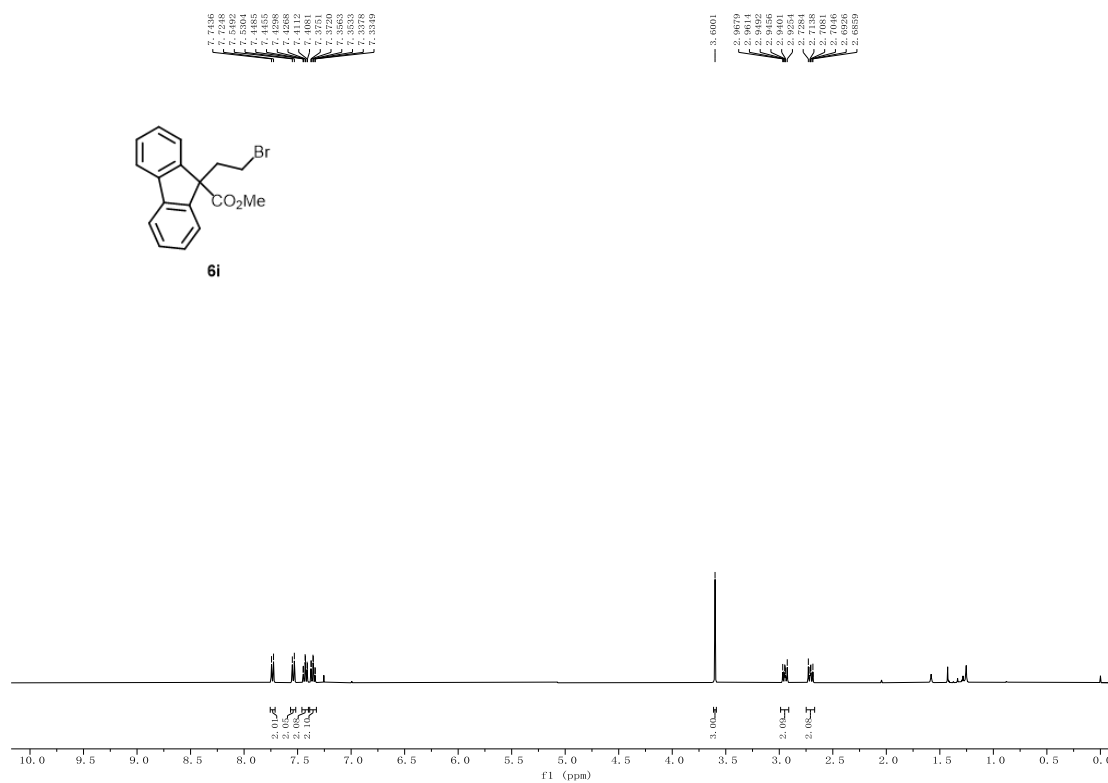

**<sup>13</sup>C NMR of compound 6i (101 MHz in CDCl<sub>3</sub>)**

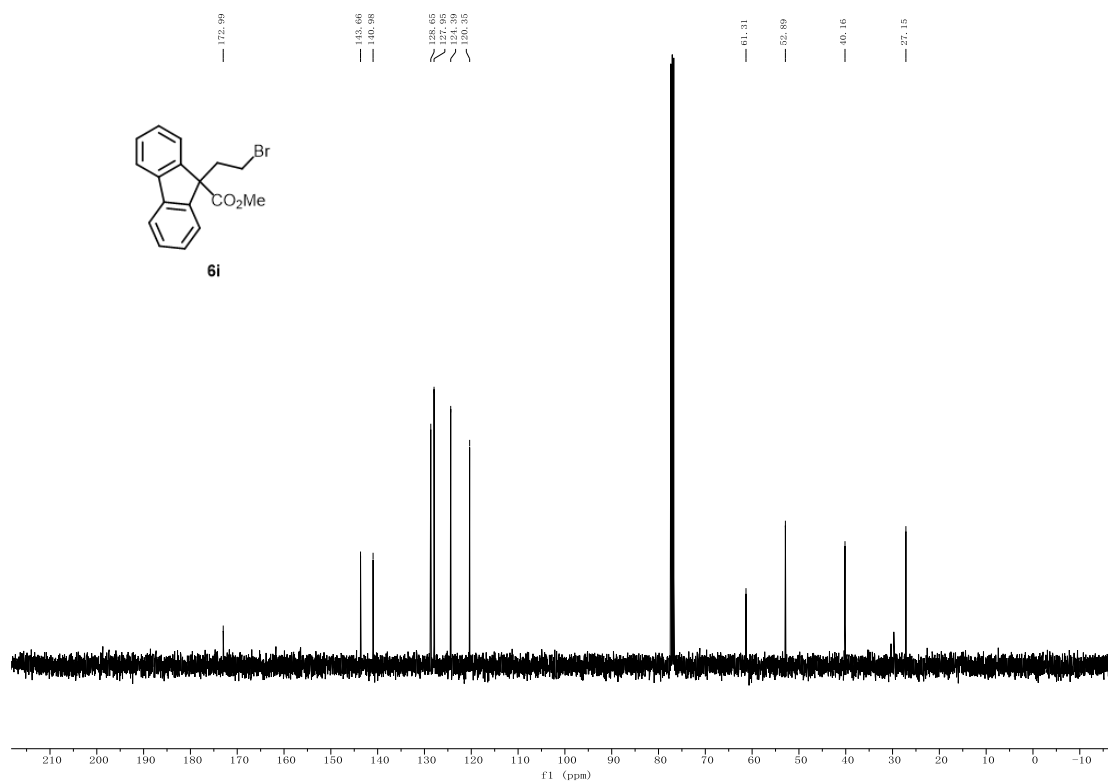

**<sup>1</sup>H NMR of compound 6j (400 MHz in CDCl<sub>3</sub>)**

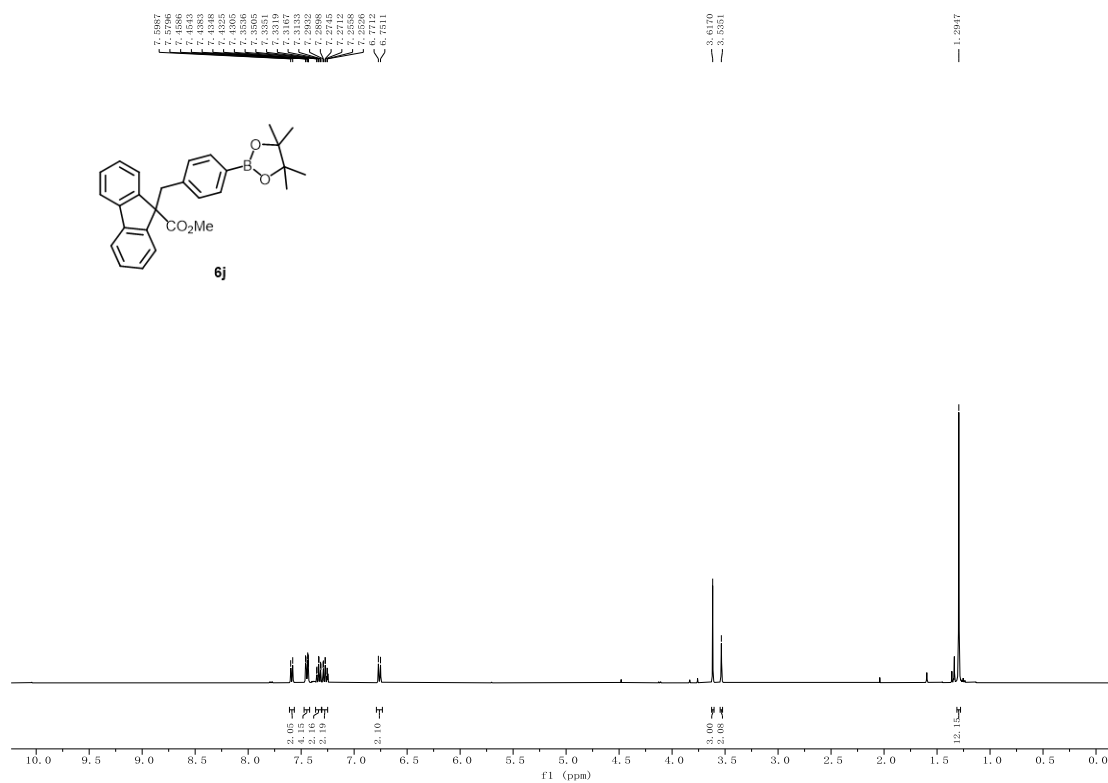

**<sup>13</sup>C NMR of compound 6j (101 MHz in CDCl<sub>3</sub>)**

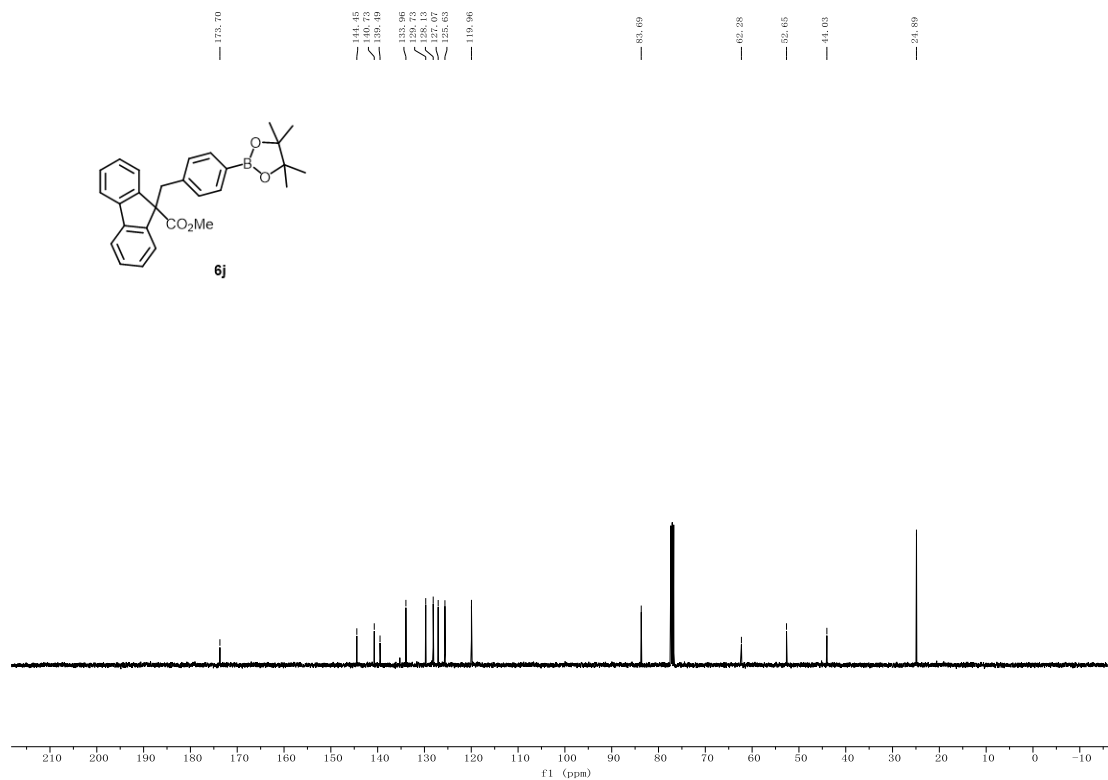

**<sup>1</sup>H NMR of compound 6k (400 MHz in CDCl<sub>3</sub>)**

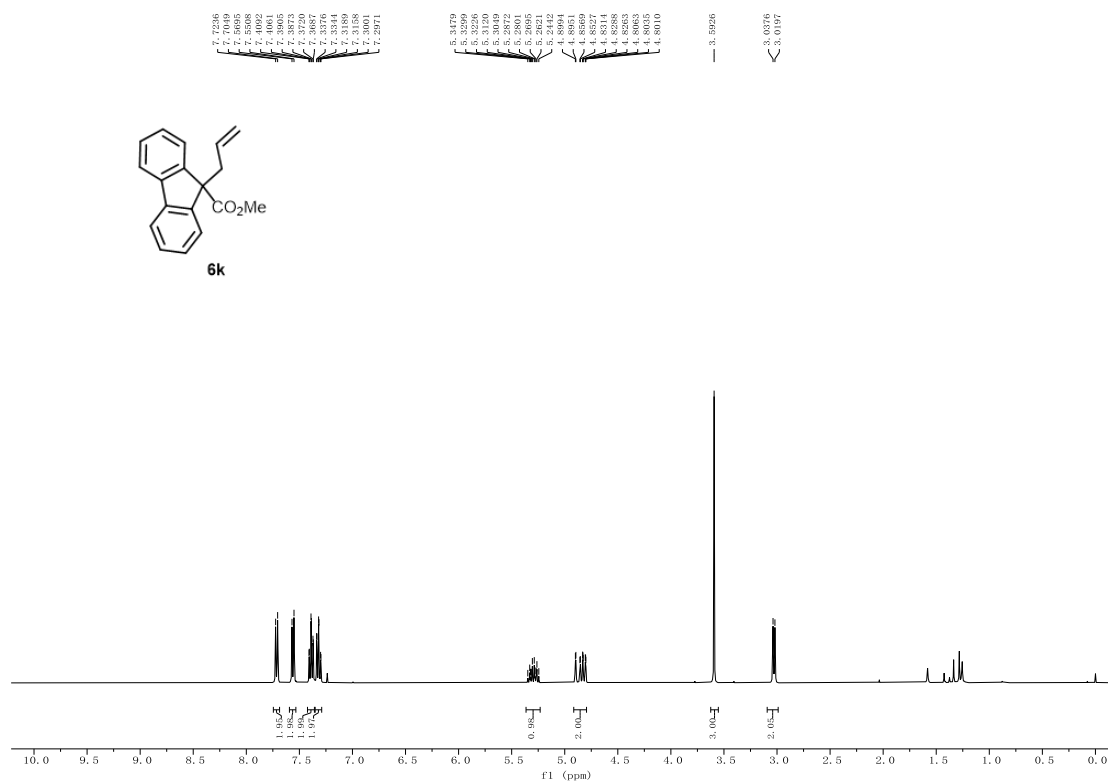

**<sup>13</sup>C NMR of compound 6k (101 MHz in CDCl<sub>3</sub>)**

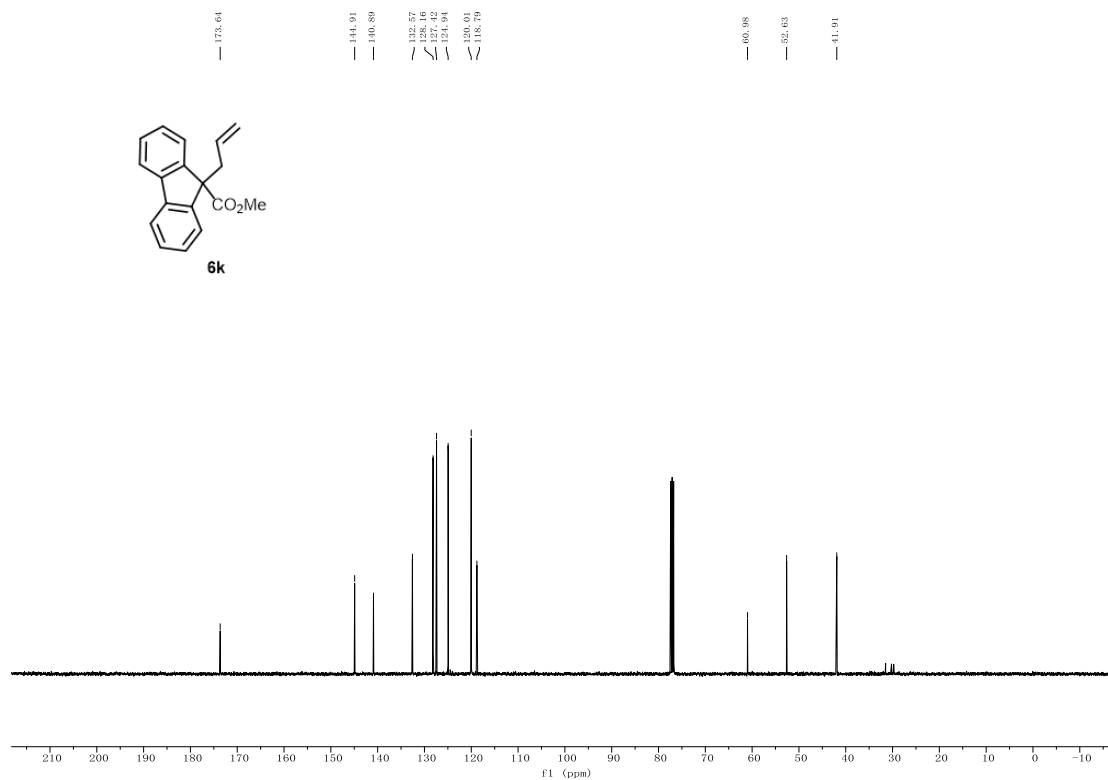

**<sup>1</sup>H NMR of compound 6l (400 MHz in CDCl<sub>3</sub>)**

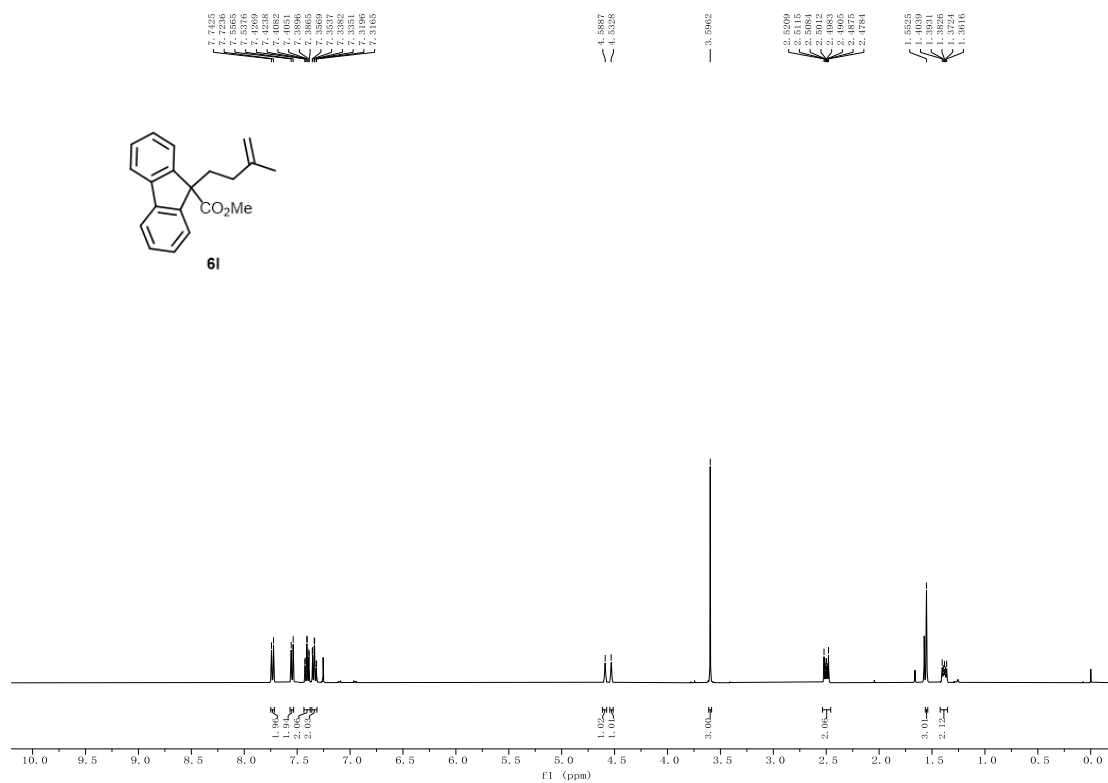

**<sup>13</sup>C NMR of compound 6l (101 MHz in CDCl<sub>3</sub>)**

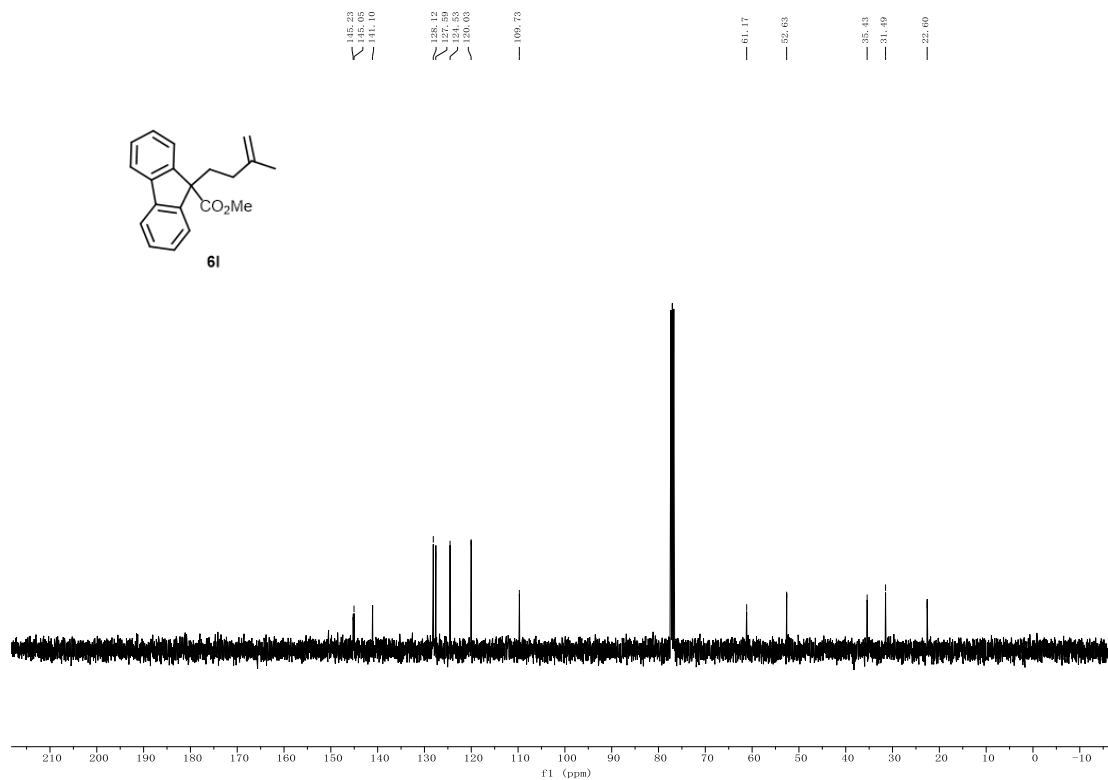

**<sup>1</sup>H NMR of compound 6m (400 MHz in CDCl<sub>3</sub>)**

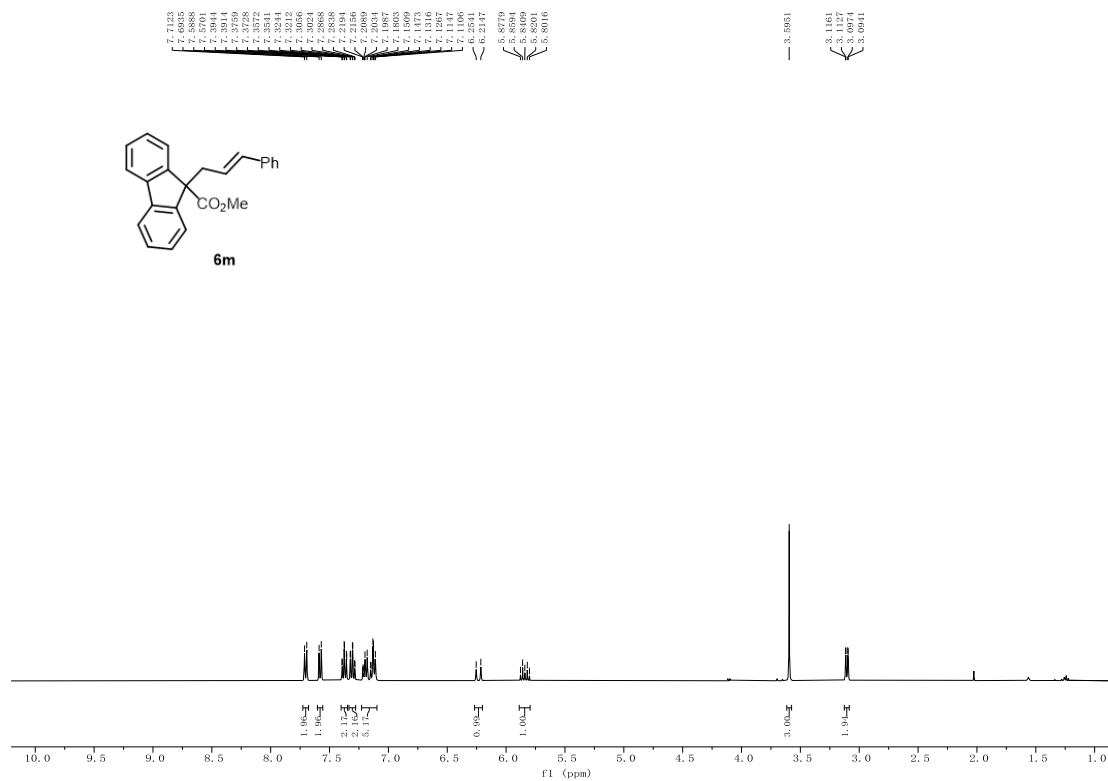

**$^{13}\text{C}$  NMR of compound **6m** (101 MHz in  $\text{CDCl}_3$ )**

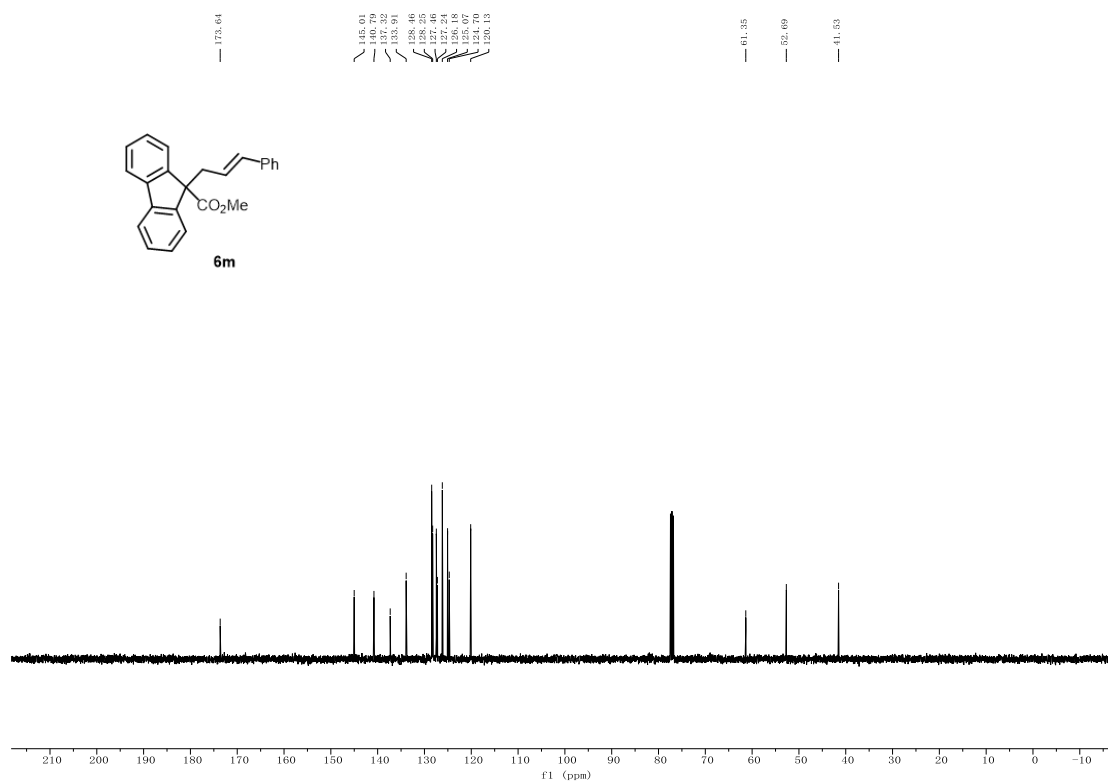

**$^1\text{H}$  NMR of compound **6n** (400 MHz in  $\text{CDCl}_3$ )**

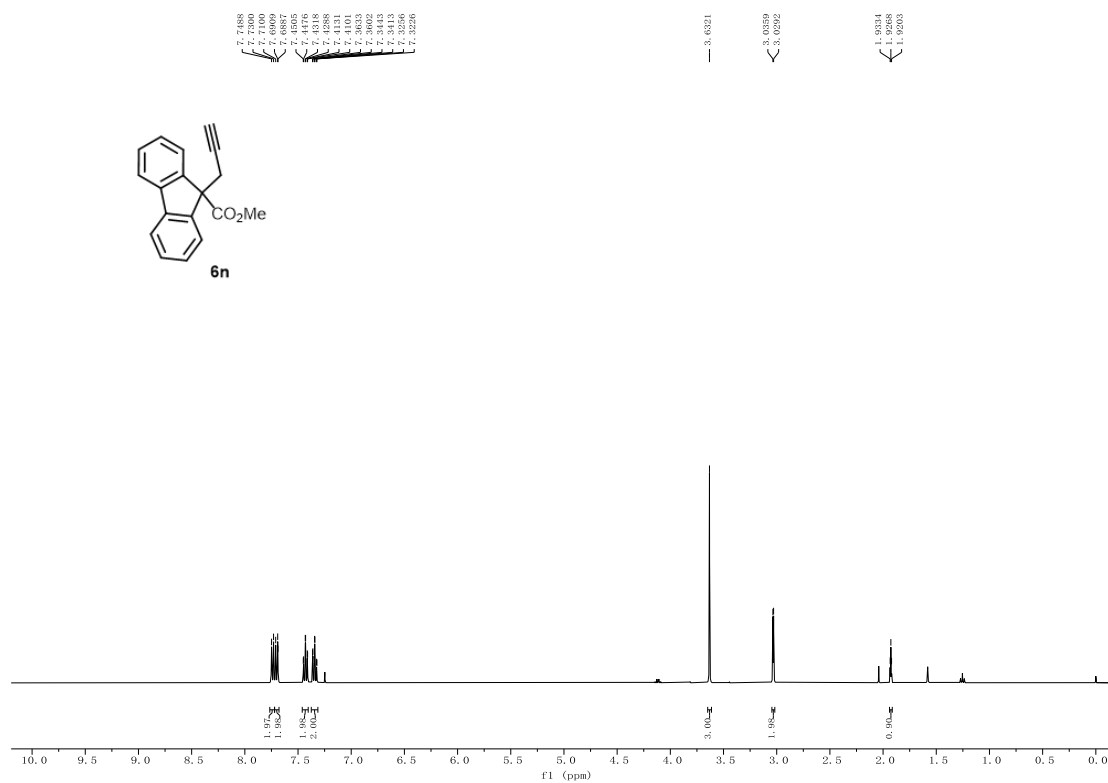

**<sup>13</sup>C NMR of compound 6n (101 MHz in CDCl<sub>3</sub>)**

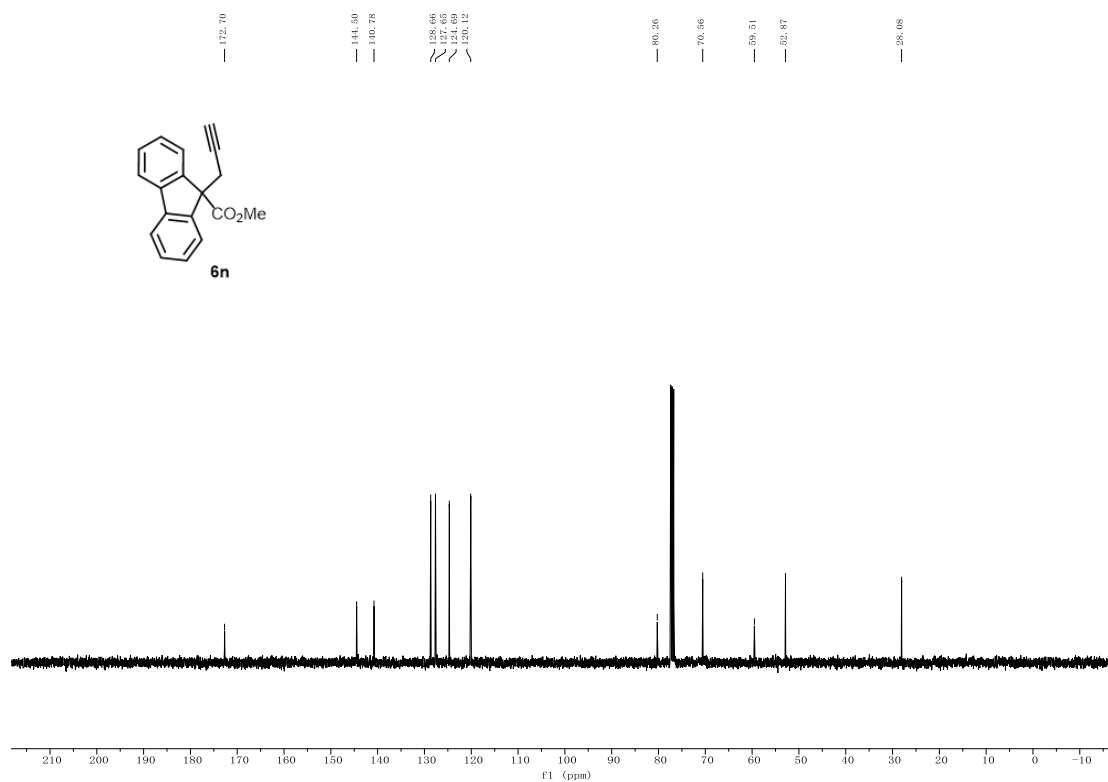

**<sup>1</sup>H NMR of compound 7a (400 MHz in CDCl<sub>3</sub>)**

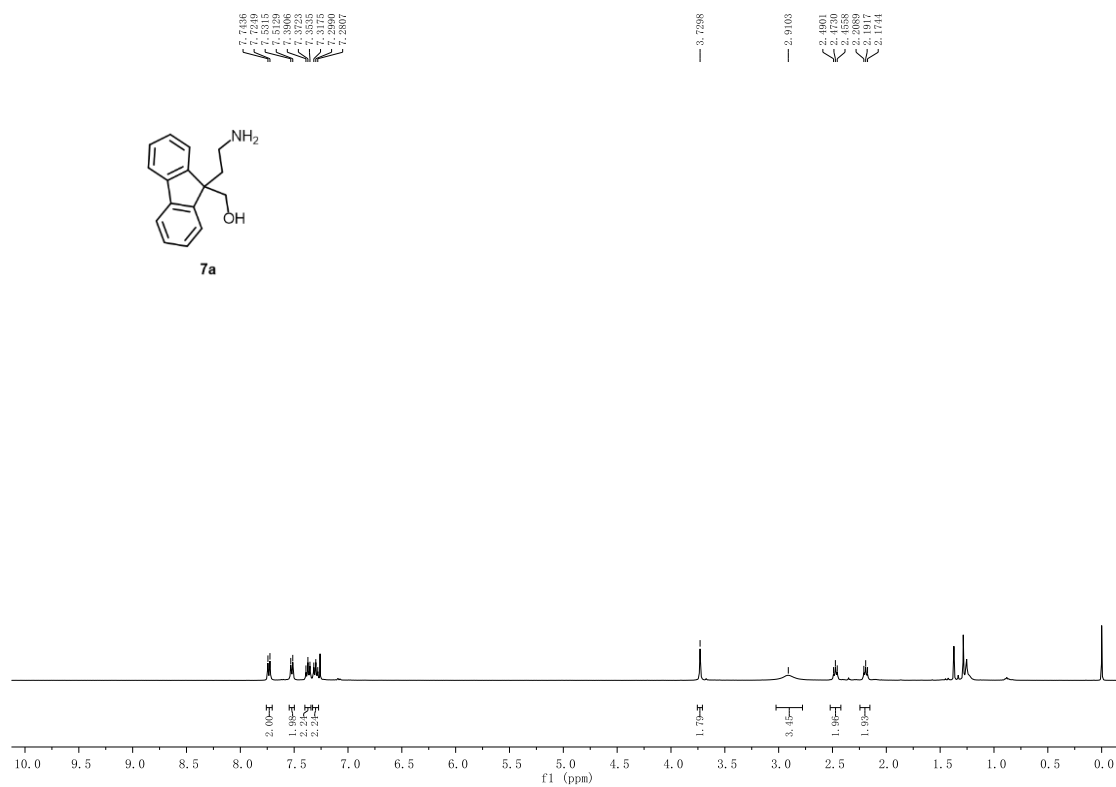

**$^{13}\text{C}$  NMR of compound **7a** (101 MHz in  $\text{CDCl}_3$ )**

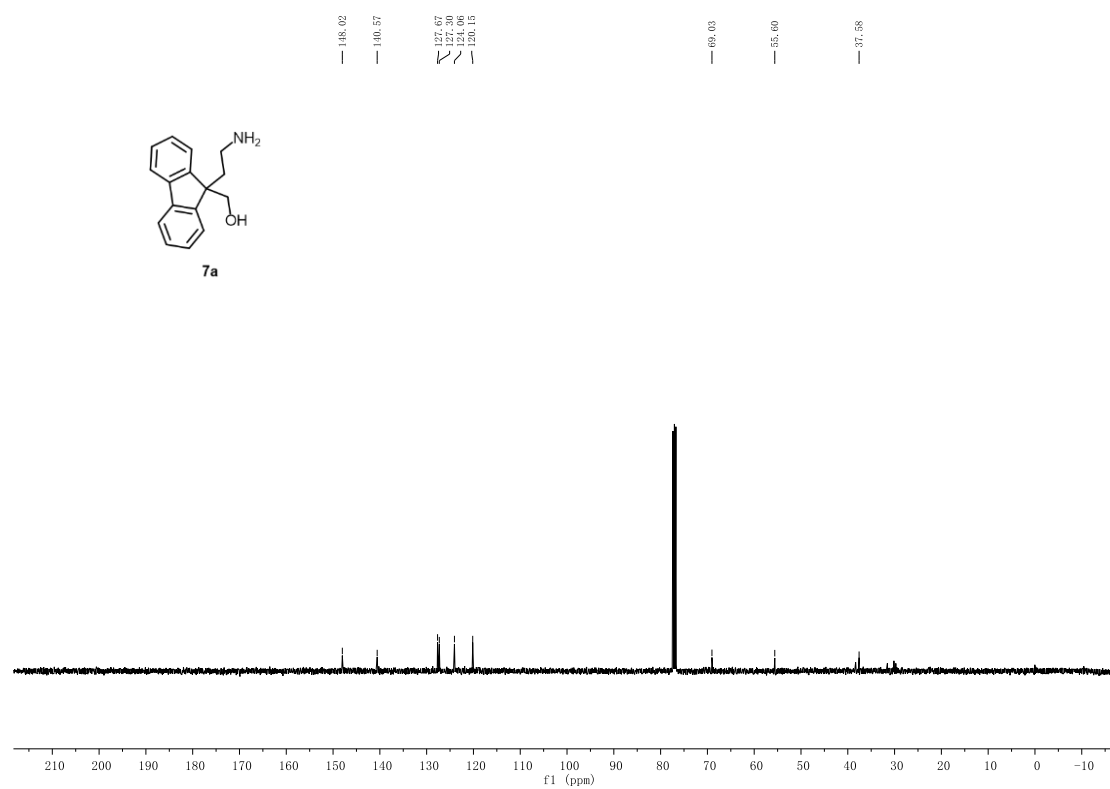

Supplement: Supplementary file 1 [file ed19a88084d53462a0de2a98.pdf]
